# Supplementary material for: A one-pot and two-stage Baeyer–Villiger reaction using 2,2′-diperoxyphenic acid under biomolecule-compatible conditions
Source: Royal Society of Chemistry journal article supplement (doi:10.1039/d1gc04478h), 2022-01-01

# Supporting Information

## A One-Pot and Two-stage Baeyer–Villiger Reaction Using 2,2'-Diperoxyphenic Acid under Biomolecule-Compatible Conditions

Shaoyan Gan,<sup>a,e</sup> Jingru Yin,<sup>a</sup> Zhiyou Yu,<sup>a</sup> Lijuan Song,<sup>a,b\*</sup> and Lei Shi<sup>a,c,d,e\*</sup>

<sup>a</sup> School of Science, Harbin Institute of Technology, Shenzhen, 518055, China

<sup>b</sup> Shenzhen Bay Laboratory, Shenzhen, 518055, China

<sup>c</sup> Guangdong Provincial Key Laboratory of Catalysis, Southern University of Science and Technology, Shenzhen 518055, China

<sup>d</sup> State Key Laboratory of Elemento-Organic Chemistry, Nankai University, Tianjin, 300071, China

<sup>e</sup> School of Chemistry and Chemical Engineering, Harbin Institute of Technology, Harbin, 150001, China

E-mail: [songlijuan@hit.edu.cn](mailto:songlijuan@hit.edu.cn), [lshi@hit.edu.cn](mailto:lshi@hit.edu.cn)

### Table of contents

|                                                                               |     |
|-------------------------------------------------------------------------------|-----|
| 1. General Methods and Materials .....                                        | S2  |
| 2. General procedure for the preparation of the 2,2'-Diperoxyphenic Acid..... | S2  |
| 3. General procedure for the preparation of substrates. ....                  | S3  |
| 4. General experimental procedures for catalyst.....                          | S5  |
| 5. General experimental procedures for lactones.....                          | S6  |
| 6. Procedure and Results of Sensitivity Assessment.....                       | S7  |
| 7. Additive-Based Robustness Screen.....                                      | S8  |
| 8. A catalytic asymmetric version of the BV reaction.....                     | S12 |
| 9. Oxygen Labelling Experiment .....                                          | S14 |
| 10. Green chemistry metrics analysis .....                                    | S16 |
| 11. Biomolecule-Compatibility Experiments .....                               | S28 |
| 12. Physical data .....                                                       | S31 |
| 13. Crystal data and structure refinement .....                               | S41 |
| 14. DFT Computations Methods: .....                                           | S43 |
| 15. References.....                                                           | S88 |
| 16. NMR spectra .....                                                         | S89 |

## 1. General Methods and Materials

All reactions were carried out directly under open air unless otherwise noted. Commercially available reagents, starting materials and solvents were used without further purification. All reactions were monitored by TLC and visualized by UV lamp (254 nm) or by staining with a solution of 10 g phosphomolybdic acid and 100 mL EtOH followed by heating. Flash column chromatography was performed using 200-300 mesh silica gel.  $^1\text{H}$  NMR (400 MHz) and  $^{13}\text{C}$  NMR (100 MHz or 150 MHz) spectra were obtained on Bruker 400M or 600M nuclear resonance spectrometers or Zhongke-Niujin ((Quantum-I Plus 400M)). HRMS (ESI) was recorded using an Agilent 6520 accurate-Mass Q-TOF spectrometer and HRMS (EI) was recorded using waters GTC. Coupling constants are reported in Hertz (Hz). The enantiomeric excesses were determined by HPLC analysis using an Agilent 1260 Infinity II LC system (column Daicel Co. CHIRALCEL AS-H; eluent: hexane/2-propanol). Data for  $^1\text{H}$ -NMR spectra were reported as follows: chemical shift (ppm, referenced to protium; s = singlet, br s = broad singlet, d = doublet, t = triplet, q = quartet, p = quintet, dd = doublet of doublets, td = triplet of doublets, m = multiplet, coupling constant (Hz), and integration). Data for  $^1\text{H}$ -NMR were reported in (ppm) relative to residual solvent peak ( $\text{CDCl}_3$ : 7.26 ppm,  $(\text{CD}_3)_2\text{SO}$ : 2.50 ppm) and  $(\text{CD}_3)_2\text{CO}$ : 2.05 ppm). Data for  $^{13}\text{C}$ -NMR were reported in (ppm) relative to residual solvent peak ( $\text{CDCl}_3$ : 77.16 ppm,  $(\text{CD}_3)_2\text{SO}$ : 39.52 ppm and  $(\text{CD}_3)_2\text{CO}$ : 29.84 ppm).

## 2. General procedure for the preparation of the 2,2'-Diperoxyphenic Acid

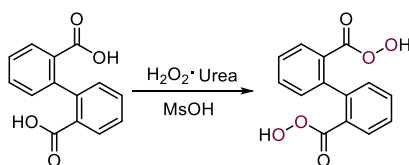

Methane sulfonic acid (30 mL) was placed in a round bottomed flask equipped with a large magnetic stirrer bar and immersed in a bath of water at 22 °C. Urea hydrogen peroxide (9.82 g, 104 mmol) was added in a single portion and stirred for 30 seconds. Diphenic acid (35 mmol) was added in a single portion and the reaction

stirred vigorously for 24 h. The reaction mixture was poured into a mixture of ice (80 g) and ethyl acetate (100 mL) and the layers separated. The aqueous layer was extracted with ethyl acetate (2 × 100 mL) and the combined organics were washed with NaHCO<sub>3</sub> (2 × 50 mL), brine (20 mL) and dried over Na<sub>2</sub>SO<sub>4</sub>. Removal of the solvent under reduced pressure gave the 2,2'-Diperoxyphenic Acid. <sup>1</sup>H NMR (400 MHz, Chloroform-d) δ 11.28 (s, 2H), 8.03 (dd, J = 7.9, 1.3 Hz, 2H), 7.70 (td, J = 7.6, 1.4 Hz, 2H), 7.58 (td, J = 7.7, 1.3 Hz, 2H), 7.32 (dd, J = 7.7, 1.3 Hz, 2H). <sup>13</sup>C NMR (101 MHz, CDCl<sub>3</sub>) δ 168.3, 142.1, 133.3, 130.9, 129.9, 128.39, 124.69. HRMS (ESI), m/z calcd for C<sub>14</sub>H<sub>9</sub>O<sub>6</sub> [M-H]<sup>-</sup>: 273.0404; found: 273.0402

### 3. General procedure for the preparation of substrates.

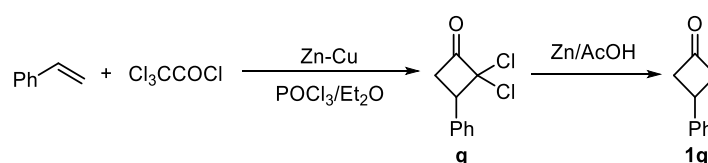

Experimental procedure for the synthesis of the **q**: To a stirred suspension of activated Zn-Cu (1.60 g, 25 mmol) and styrene (10 mmol) in dry Et<sub>2</sub>O (20 mL) was added dropwise through an addition funnel, during 2 h at reflux, a solution of trichloroacetic chloride (2.2 mL, 20 mmol) and phosphorus oxychloride (1.9 mL, 20 mmol) in Et<sub>2</sub>O (10 mL). The suspension was stirred overnight at reflux. The mixture was cooled to room temperature and then filtered through a pad of Celite. The residue was washed with Et<sub>2</sub>O (3 × 15 mL). The organic phase was concentrated in vacuo to give crude products **B**, which were routinely used without further purification to the next step.

Experimental procedure for the synthesis of the cyclobutanones **1q**: The cyclobutanones **1q** were prepared according to the methods reported in the literature with a minor modification.[4] The solution of the previous crude products **q** in acetic acid (10 mL) was added dropwise to a vigorously stirred suspension of zinc dust (2.6 g, 40 mmol) in acetic acid (8 mL) at 0 °C. After the addition, the reaction mixture was heated at 70 °C for 2 h. The mixture was allowed to cool to room temperature and then evacuated to get rid of most of the acetic acid. The residue was dissolved in Et<sub>2</sub>O (20 mL) and then poured into a separation funnel containing water (20 mL) and Et<sub>2</sub>O

(20 mL). The organic layer was washed with water ( $3 \times 10$  mL), saturated sodium bicarbonate solution ( $2 \times 10$  mL), brine (50 mL) and dried over  $\text{Na}_2\text{SO}_4$ . The solution was then filtered and concentrated, followed by purification with flash chromatography (petroleum ether/EtOAc = 8/1) to afford the desired pure sample products **1q** which have been reported previously.<sup>[1]</sup>

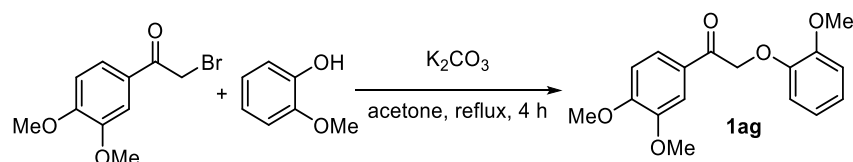

A mixture of 2-methoxyphenol (6.5 g, 25.12 mmol) and  $\text{K}_2\text{CO}_3$  (5.21 g, 37.68 mmol) was dissolved in acetone (250 ml) with stirred at room temperature for 20 min. After addition of 2-Bromo-1-(3,4-dimethoxyphenyl) ethan-1-one in acetone (250 ml), the reaction mixture was reflux for 4 h and cooled to room temperature. The suspension was collected by filtration and washed with acetone and concentrated in vacuo. The solid was dissolved in ethyl acetate and wash with water. The combined organic phases were washed with brine, dried with  $\text{MgSO}_4$ , and concentrated in vacuo. The crude residue was purified by recrystallization from ethanol to give a white solid 1-(3,4-dimethoxyphenyl)-2-(2-methoxyphenoxy) ethan-1-one (**1ag**, 78%).  $^1\text{H}$  NMR (400 MHz, Chloroform- $d$ )  $\delta$  7.70 – 7.64 (m, 1H), 7.59 (d,  $J = 1.9$  Hz, 1H), 6.99 – 6.87 (m, 3H), 6.86 – 6.80 (m, 2H), 5.29 (d,  $J = 0.9$  Hz, 2H), 3.94 (d,  $J = 7.2$  Hz, 6H), 3.88 (d,  $J = 0.9$  Hz, 3H).  $^{13}\text{C}$  NMR (101 MHz,  $\text{CDCl}_3$ )  $\delta$  193.38, 153.90, 149.78, 149.29, 147.64, 127.91, 122.86, 122.43, 120.90, 114.68, 112.19, 110.48, 110.21, 77.48, 77.16, 76.84, 72.05, 56.22, 56.10, 55.98.

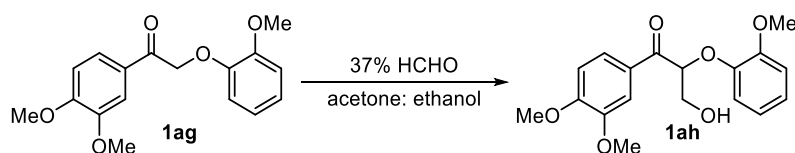

A mixture of 1-(3,4-dimethoxyphenyl)-2-(2-methoxyphenoxy) ethanone (2.0 g, 6.62 mmol), potassium carbonate (1 g, 7.28 mmol) and acetone: ethanol (v/v=1:1, 34 ml) was added a water solution of formaldehyde (37%) (0.4 g, 13.23 mmol) at room temperature for 4 h. After the reaction mixture was filtered and concentrated in vacuo. The syrup product was poured into water and extracted with ethyl acetate. The crude



was purified by column chromatography (petroleum ether/ethyl acetate, 1:1) to give adduct 1-(3,4-dimethoxyphenyl)-3-hydroxy-2-(2-methoxyphenoxy) propan-1-one (**1ah**, 68%) which have been reported previously.<sup>[2]</sup> <sup>1</sup>H NMR (400 MHz, Chloroform-d)  $\delta$  7.70 – 7.64 (m, 1H), 7.59 (d, J = 1.9 Hz, 1H), 6.99 – 6.87 (m, 3H), 6.86 – 6.80 (m, 2H), 5.29 (d, J = 0.9 Hz, 2H), 3.94 (d, J = 7.2 Hz, 6H), 3.88 (d, J = 0.9 Hz, 3H). <sup>13</sup>C NMR (101 MHz, CDCl<sub>3</sub>)  $\delta$  195.11, 154.01, 150.14, 149.25, 146.96, 128.06, 123.67, 123.31, 121.23, 117.49, 112.31, 110.98, 110.20, 84.15, 77.48, 77.16, 76.84, 63.78, 56.17, 56.02, 55.85.

#### 4. General experimental procedures for catalyst

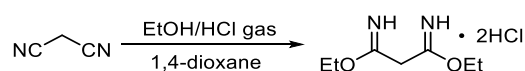

A solution of malonodinitrile (10.00 g, 151 mmol) in dry 1,4-dioxane (200 mL) was added dropwise to a mixture of dry ethanol (18.0 mL, 312 mmol) and 1,4-dioxane (350 mL) over 4.5 h at 0–5 °C, while gaseous HCl was continuously passed through the reaction vessel. The stream of HCl was continued for 1.5 h after addition was completed, whereupon the reaction mixture was allowed to warm up to r.t. and stirred for 12 h. The precipitate formed was filtered off, washed thoroughly with dry 1,4-dioxane and ether, and dried in high vacuum to afford dihydrochloride salt (22.18 g, 93%) as a white powder.

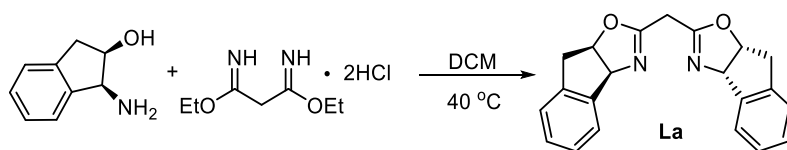

(1*S*,2*R*)-(-)-*cis*-1-Amino-2-indanol (1.08 g, 7.24 mmol, 2.1 equiv) and diethyl malonimidate dihydrochloride (0.80 g, 3.46 mmol, 1.0 equiv) were taken up in CH<sub>2</sub>Cl<sub>2</sub> (80 mL), and the resulting suspension was refluxed for 16 h. Upon completion, the reaction contents were poured into water (160 mL) and extracted with CH<sub>2</sub>Cl<sub>2</sub> (4 × 40 mL). The combined organic layers were dried (MgSO<sub>4</sub>), filtered and concentrated. The resultant crude product was recrystallized from *i*-PrOH (100 mL). The mother liquor was concentrated, and a second recrystallization was performed with *i*-PrOH (30 mL) to provide ligand **Ligand a** (0.853 g from first crop, 0.071 g

from second crop, 81% yield overall) as thin white needles, <sup>1</sup>H NMR (400 MHz, Chloroform-d) δ 7.39 (dd, J = 6.6, 2.1 Hz, 2H), 7.18 (m, J = 5.9, 3.7, 2.8 Hz, 6H), 5.49 (d, J = 8.0 Hz, 2H), 5.27 (m, J = 8.2, 7.0, 1.8 Hz, 2H), 3.31 (dd, J = 18.0, 7.0 Hz, 2H), 3.19 (d, J = 1.1 Hz, 2H), 3.09 (dd, J = 18.0, 1.7 Hz, 2H). <sup>13</sup>C NMR (101 MHz, CDCl<sub>3</sub>) δ 162.2, 141.7, 139.8, 128.6, 127.6, 125.6, 125.4, 83.7, 76.8, 39.8, 28.8.

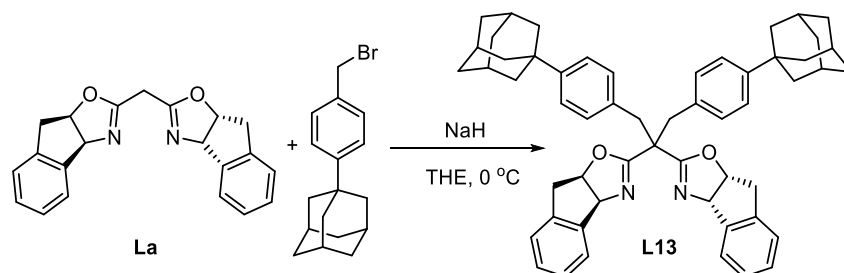

NaH [60 % dispersion in mineral oil] (0.12 g, 3.0 mmol) was added to a solution of **La** (0.20 g, 0.6 mmol) in anhydrous THF (20 mL) at room temperature under N<sub>2</sub> atmosphere. The mixture was then cooled to 0 °C and a solution of 4-AdaMantyl benzyl bromide (0.68 g, 3.0 mmol) in THF (10 mL) was slowly added with stirring. The reaction mixture was slowly warmed to room temperature. When the reaction was complete (monitored by TLC), the reaction mixture was poured into saturated aqueous NH<sub>4</sub>Cl (15 mL) and H<sub>2</sub>O (50 mL), extracted with CH<sub>2</sub>Cl<sub>2</sub> (50 mL×3). The combined organic layers were dried over anhydrous Na<sub>2</sub>SO<sub>4</sub>, filtered, and concentrated. The residue was purified by flash chromatography (hexane/acetone, 10/1) affording **L13** as white solid (336 mg, 90%), <sup>1</sup>H NMR (400 MHz, Chloroform-d) δ 7.47 (d, J = 7.4 Hz, 1H), 7.34 (m, J = 15.7, 7.8 Hz, 3H), 6.81 (d, J = 8.2 Hz, 2H), 6.73 (d, J = 8.2 Hz, 2H), 5.60 (d, J = 7.9 Hz, 1H), 5.31 (t, J = 7.2 Hz, 1H), 3.34 (dd, J = 18.1, 6.8 Hz, 1H), 3.21 (d, J = 14.1 Hz, 1H), 3.10 – 2.96 (m, 2H), 2.11 – 2.03 (m, 3H), 1.85 – 1.71 (m, 12H). <sup>13</sup>C NMR (101 MHz, CDCl<sub>3</sub>) δ 167.6, 149.2, 141.7, 140.0, 133.2, 130.1, 128.5, 127.6, 126.0, 125.2, 124.2, 83.4, 76.6, 47.8, 43.2, 39.5, 38.0, 37.0, 36.9, 36.9, 29.1. HRMS (ESI), m/z calcd for C<sub>55</sub>H<sub>59</sub>N<sub>2</sub>O<sub>2</sub> [M + H]<sup>+</sup>: 779.4572; found: 779.4572.

## 5. General experimental procedures for lactones

A solution of appropriate ketones (0.3 mmol) and **2,2'-DPPA** (0.225 mmol) in 3 mL DCM, H<sub>2</sub>O and 1× PBS, in a standard Schlenk tube at room temperature,

respectively. After the completion of the reaction monitored by TLC, the reaction was concentrated in vacuum and purified by column chromatography using petroleum ether/ethyl acetate to afford corresponding products, partially known compounds date is consistent with literature.

## 6. Procedure and Results of Sensitivity Assessment

**Table S1 General description of experiments included in one sensitivity assessment**

|                       |                                     |               |                 |
|-----------------------|-------------------------------------|---------------|-----------------|
| High <i>c</i>         | 2.7 mL solvent                      | Low <i>T</i>  | 35 °C           |
| Low <i>c</i>          | 3.3 mL solvent                      | High <i>T</i> | 15 °C           |
| High H <sub>2</sub> O | 30 μL H <sub>2</sub> O <sub>2</sub> | Low <i>I</i>  | dark            |
| Low O <sub>2</sub>    | N <sub>2</sub>                      | High <i>I</i> | blue LED        |
| High O <sub>2</sub>   | O <sub>2</sub>                      | Big scale     | 6 mol (1.032 g) |

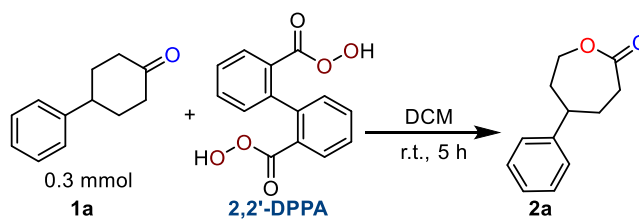

| Number | Experiment               | Yield 1 / % | Yield 2 / % | Average Y. / % | Deviation / % |
|--------|--------------------------|-------------|-------------|----------------|---------------|
| 1      | High <i>c</i>            | 99          | 99          | 99             | 0             |
| 2      | Low <i>c</i>             | 98          | 98          | 98             | -1            |
| 3      | High H <sub>2</sub> O    | 97          | 99          | 98             | -1            |
| 4      | Low O <sub>2</sub>       | 99          | 99          | 99             | 0             |
| 5      | High O <sub>2</sub>      | 98          | 96          | 97             | -2            |
| 6      | Low <i>T</i>             | 91          | 89          | 90             | -9            |
| 7      | High <i>T</i>            | 97          | 99          | 98             | -1            |
| 8      | Low <i>I</i> (dark)      | 99          | 98          | 98.5           | -0.5          |
| 9      | High <i>I</i> (blue LED) | 99          | 99          | 99             | 0             |
| 10     | control                  | 99          | 99          | 99             |               |
| 11     | Big scale                | 92          | 93          | 92.5           | -6.5          |

**Radar diagram:**

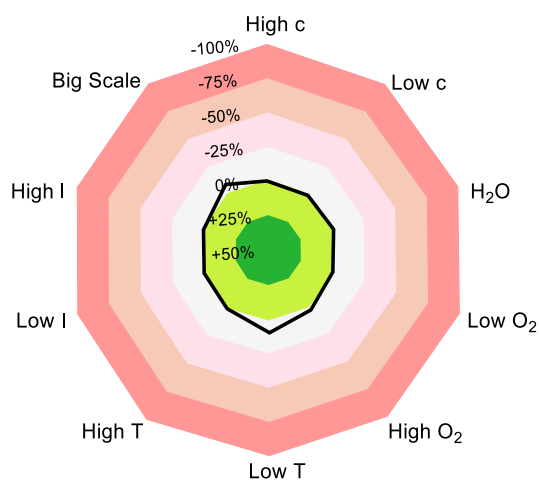

## 7. Additive-Based Robustness Screen

In order to evaluate the robustness and the functional group preservation of the investigated reactions, we decided to apply an intermolecular additive-based screen to these transformations. This screening evaluates the tolerance of a given reaction to a series of additives (robustness), as well as the stability of these additives to the reaction conditions (functional group preservation).

A solution of appropriate **1a** (52.3 mg, 0.3 mmol), **2,2'-DPPA** (62 mg, 0.225 mmol) and additives (0.3 mmol) in DCM, H<sub>2</sub>O and 1XPBS in a standard Schlenk tube at room temperature, After the completion of the reaction monitored by TLC, the reaction was concentrated in vacuum and purified by column chromatography using petroleum ether/ethyl acetate to afford corresponding products.

### Table S2. Robustness Screen in DCM

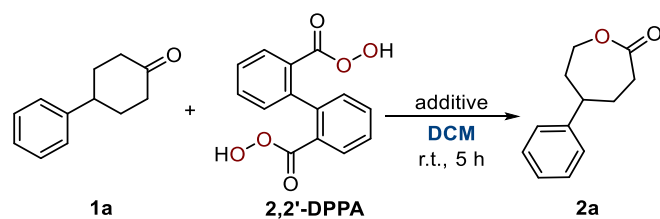

| Entry | Additive                                                                            | yield of <b>C</b> (%)                    | Additive remaining (%)                  | SM remaining (%) |
|-------|-------------------------------------------------------------------------------------|------------------------------------------|-----------------------------------------|------------------|
| 1     | None                                                                                | 99                                       | —                                       |                  |
| 2     | 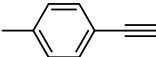   | 99 <span style="color: green;">✓</span>  | 97 <span style="color: green;">✓</span> | 0                |
| 3     |    | 42 <span style="color: yellow;">-</span> | 80 <span style="color: green;">✓</span> | 56               |
| 4     |    | 0 <span style="color: red;">✗</span>     | 0 <span style="color: red;">✗</span>    | 96               |
| 5     |    | 99 <span style="color: green;">✓</span>  | 98 <span style="color: green;">✓</span> | 0                |
| 6     |   | 26 <span style="color: red;">✗</span>    | 10 <span style="color: red;">✗</span>   | 70               |
| 7     |  | 95 <span style="color: green;">✓</span>  | 13 <span style="color: red;">✗</span>   | 0                |
| 8     |  | 97 <span style="color: green;">✓</span>  | 98 <span style="color: green;">✓</span> | 0                |
| 9     |  | 98 <span style="color: green;">✓</span>  | 95 <span style="color: green;">✓</span> | 0                |
| 10    |  | 84 <span style="color: green;">✓</span>  | 0 <span style="color: red;">✗</span>    | 13               |
| 11    |  | 37 <span style="color: yellow;">-</span> | 0 <span style="color: red;">✗</span>    | 61               |
| 12    |  | 76 <span style="color: green;">✓</span>  | 99 <span style="color: green;">✓</span> | 21               |

The standard reaction is undertaken in the presence of one molar equivalent of the given additive. The yield of **2a**, and the additive and starting material remaining after reaction is given. Colour coding should help the ready assessment of the data: green '✓' (above 66%), yellow '-' (34 - 66%), red '✗' (below 34%). Isolated yield. SM is starting material.

**Table S3. Robustness Screen in pure water.**

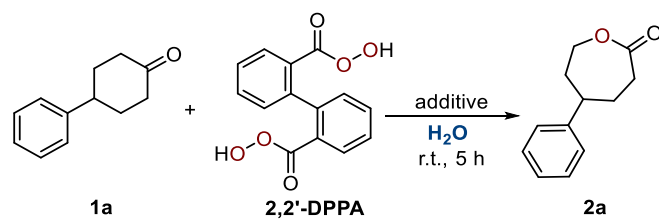

| Entry | Additive                                                                            | yield of <b>C</b> (%)                    | Additive remaining (%)                  | SM remaining (%) |
|-------|-------------------------------------------------------------------------------------|------------------------------------------|-----------------------------------------|------------------|
| 1     | None                                                                                | 99                                       | –                                       |                  |
| 2     | 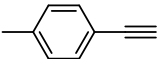   | 99 <span style="color: green;">✓</span>  | 96 <span style="color: green;">✓</span> | 0                |
| 3     |    | 53 <span style="color: yellow;">–</span> | 84 <span style="color: green;">✓</span> | 43               |
| 4     |    | 0 <span style="color: red;">✗</span>     | 0 <span style="color: red;">✗</span>    | 97               |
| 5     |   | 99 <span style="color: green;">✓</span>  | 97 <span style="color: green;">✓</span> | 0                |
| 6     |  | 13 <span style="color: red;">✗</span>    | 18 <span style="color: red;">✗</span>   | 84               |
| 7     |  | 84 <span style="color: green;">✓</span>  | 16 <span style="color: red;">✗</span>   | 13               |
| 8     |  | 97 <span style="color: green;">✓</span>  | 95 <span style="color: green;">✓</span> | 0                |
| 9     |  | 99 <span style="color: green;">✓</span>  | 95 <span style="color: green;">✓</span> | 0                |
| 10    |  | 79 <span style="color: green;">✓</span>  | 0 <span style="color: red;">✗</span>    | 18               |
| 11    |  | 47 <span style="color: yellow;">–</span> | 0 <span style="color: red;">✗</span>    | 50               |
| 12    |  | 84 <span style="color: green;">✓</span>  | 99 <span style="color: green;">✓</span> | 13               |

The standard reaction is undertaken in the presence of one molar equivalent of the given additive. The yield of **2a**, and the additive and starting material remaining after reaction is given. Colour coding should help the ready assessment of the data: green '✓' (above 66%), yellow '–' (34 - 66%), red '✗' (below 34%). Isolated yield. SM is starting material.

**Table S4. Robustness Screen in 1XPBS.**

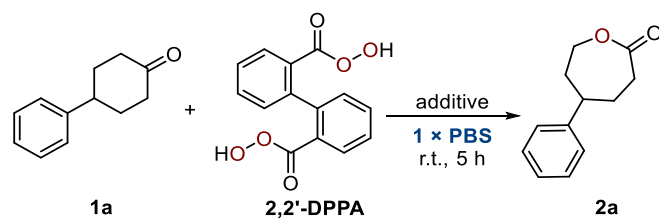

| Entry | Additive                                                                            | yield of <b>C</b> (%)                    | Additive remaining (%)                  | SM remaining (%) |
|-------|-------------------------------------------------------------------------------------|------------------------------------------|-----------------------------------------|------------------|
| 1     | None                                                                                | 99                                       | —                                       |                  |
| 2     | 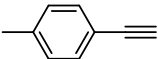   | 97 <span style="color: green;">✓</span>  | 96 <span style="color: green;">✓</span> | 0                |
| 3     |    | 37 <span style="color: yellow;">-</span> | 85 <span style="color: green;">✓</span> | 60               |
| 4     |    | 0 <span style="color: red;">✗</span>     | 0 <span style="color: red;">✗</span>    | 97               |
| 5     |   | 95 <span style="color: green;">✓</span>  | 97 <span style="color: green;">✓</span> | 0                |
| 6     |  | 0 <span style="color: red;">✗</span>     | 0 <span style="color: red;">✗</span>    | 96               |
| 7     |  | 87 <span style="color: green;">✓</span>  | 11 <span style="color: red;">✗</span>   | 10               |
| 8     |  | 97 <span style="color: green;">✓</span>  | 95 <span style="color: green;">✓</span> | 0                |
| 9     |  | 98 <span style="color: green;">✓</span>  | 95 <span style="color: green;">✓</span> | 0                |
| 10    |  | 89 <span style="color: green;">✓</span>  | 0 <span style="color: red;">✗</span>    | 10               |
| 11    |  | 55 <span style="color: yellow;">-</span> | 0 <span style="color: red;">✗</span>    | 41               |
| 12    |  | 71 <span style="color: green;">✓</span>  | 97 <span style="color: green;">✓</span> | 23               |

The standard reaction is undertaken in the presence of one molar equivalent of the given additive. The yield of **2a**, and the additive and starting material remaining after reaction is given. Colour coding should help the ready assessment of the data: green '✓' (above 66%), yellow '-' (34 - 66%), red '✗' (below 34%). Isolated yield. SM is starting material.

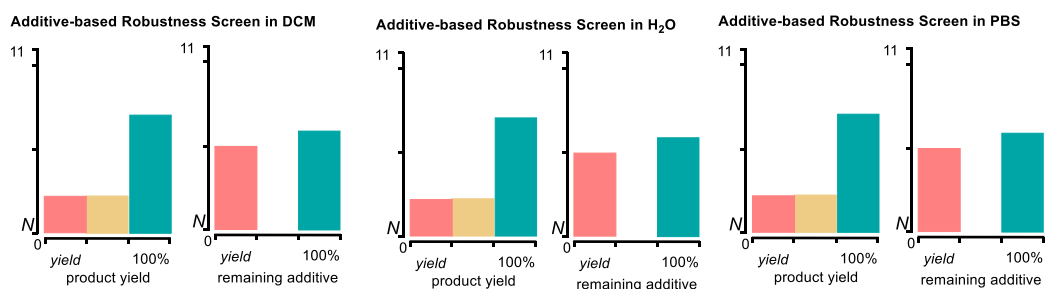

**Scheme S1** Additive-based Robustness screen in DCM, H<sub>2</sub>O and PBS.

## 8. A catalytic asymmetric version of the BV reaction.

**Table S5** Ligand screening

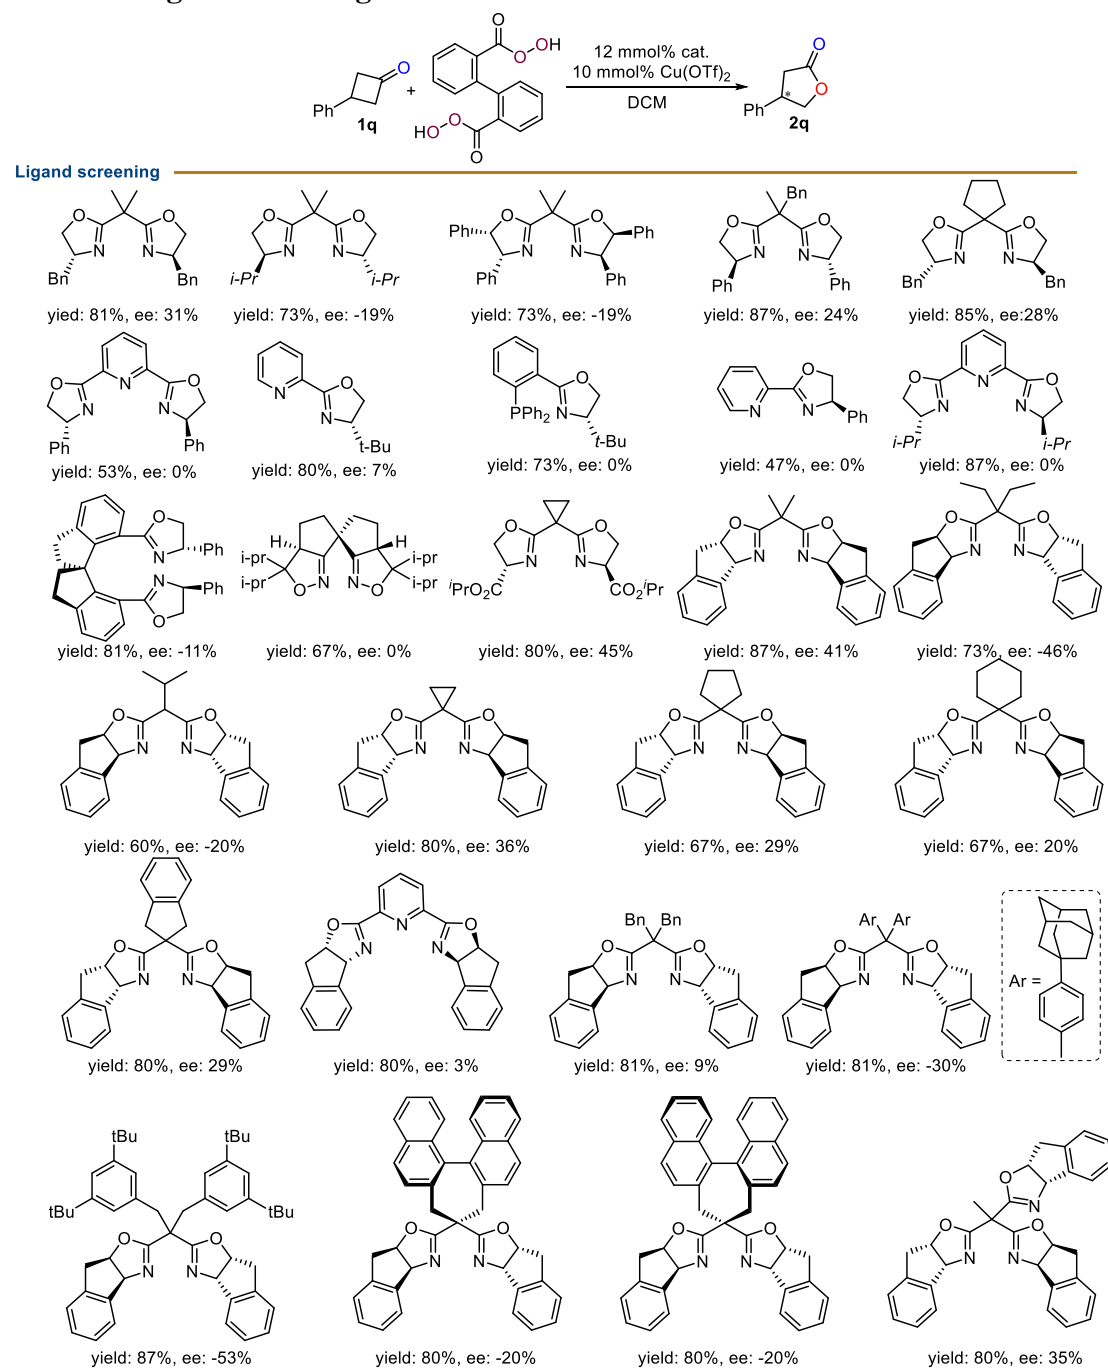



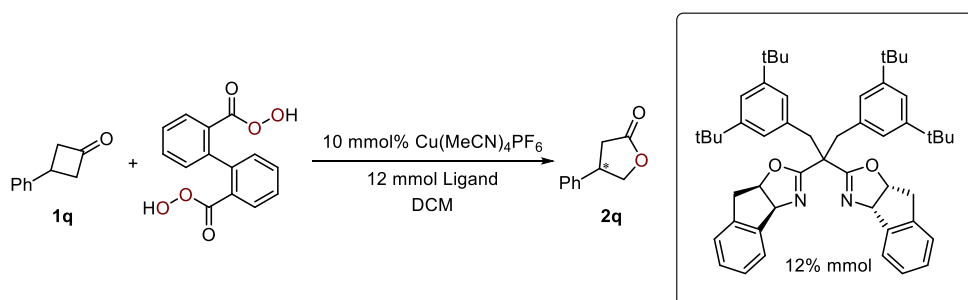

In a dried sealed 25 mL Schlenk tube, **L12** (8.8 mg, 0.012 mmol, 12 mmol %),  $\text{Cu}(\text{CH}_3\text{CN})_4\text{PF}_6$  (3.6 mg, 0.01 mmol, 10 mmol %) were dissolved in dry DCM under  $\text{N}_2$ , and the mixture was stirred for 1 h at room temperature. Then **1q** (14.6 mg, 0.1 mmol) and 2,2'-DPPA (15 mg, 0.055 mmol) were added sequentially at room temperature and stirred for 3 h. According to the same workup procedure, the residue was purified by chromatography (PE/EA = 15:1) to give product **2q** (14 mg, 87% yield, 60% ee) as light-yellow oil.

**HPLC analysis:** DAICEL CHIRALPAK AS-H, n-hexane/isopropanol = 80/20, 1.0 mL/min,  $\lambda = 210$  nm,  $t_R$  (major) = 13.2 min,  $t_R$  (minor) = 14.5 min, ee = 60%.

Chiral HPLC spectrum of (rac)-**2q**

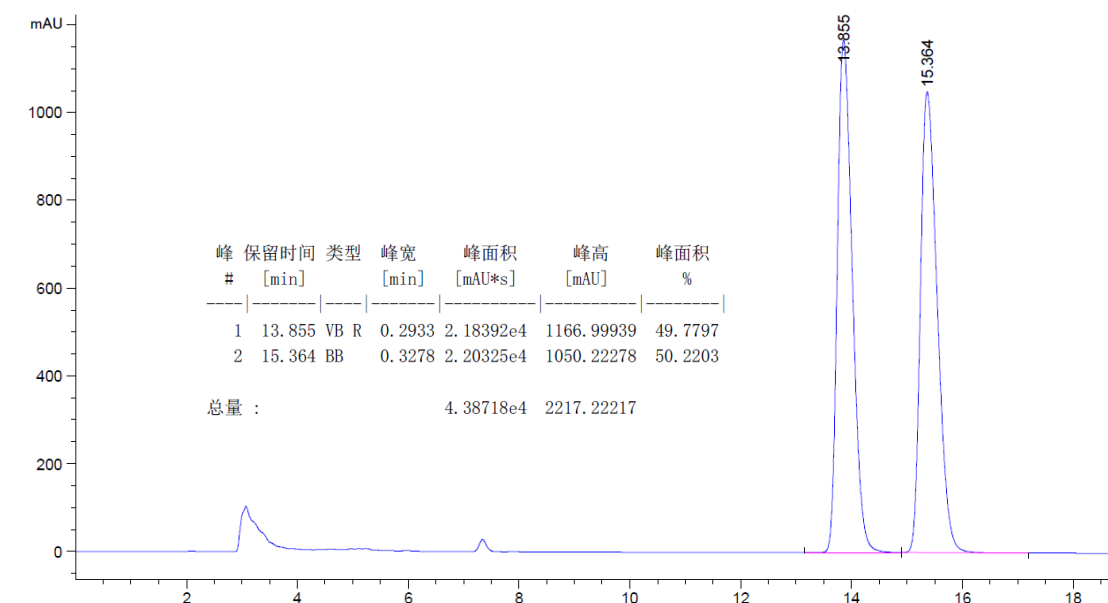

### Chiral HPLC spectrum of (S)-2q

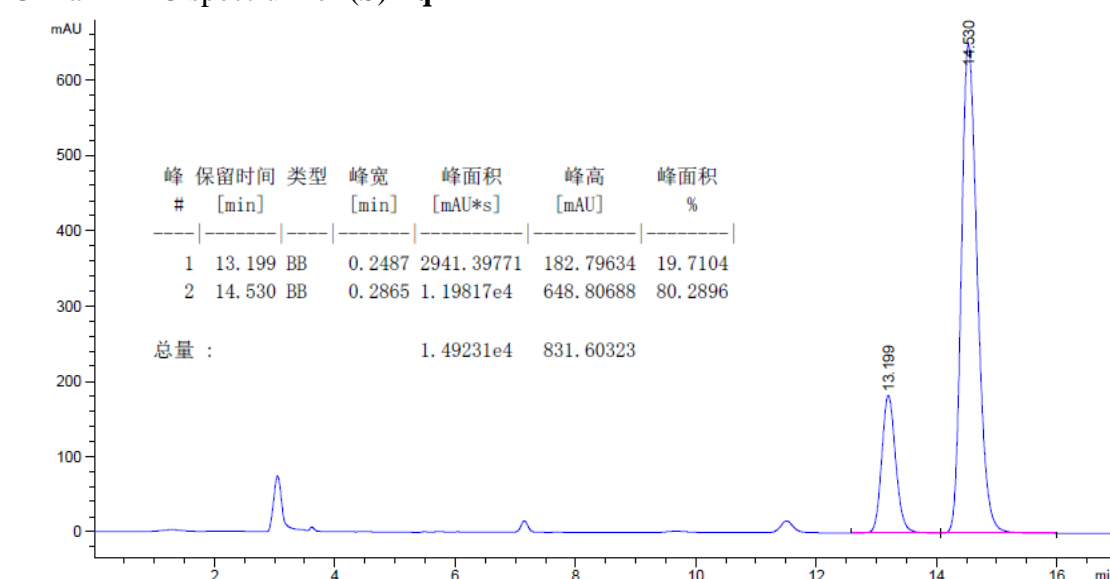

## 9. Oxygen Labelling Experiment

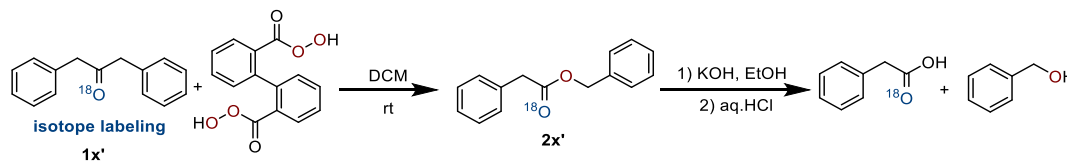

A solution of **1x'** and **2,2'-DPPA** in DCM, after stirred for 16 h, After the completion of the reaction monitored by TLC, the reaction was concentrated in vacuum and purified by column chromatography using petroleum ether/ethyl acetate to afford corresponding products.

A solution of **2x'** (0.4 mmol, 90 mg) and KOH (90 mg, 1.6 mmol, 4 equiv) in a mixture 4 mL EtOH and 2 mL water, reflux for 8 hours, then reduced pressure to remove the solvent. The residue was extracted twice with ethyl acetate and then the combined organic phases were washed with brine and dried over Na<sub>2</sub>SO<sub>4</sub>. After removal of the solvent, the crude mixture was purified by column chromatography on silica gel to afford the compound benzyl alcohol. The water phases were added HCl and extracted twice with ethyl acetate, then the combined organic phases were washed with brine and dried over Na<sub>2</sub>SO<sub>4</sub>. After removal of the solvent, the crude mixture was purified by column chromatography on silica gel to afford the compound phenylacetic acid. The benzyl alcohol was analyzed by GC mass, and the phenylacetic was

analyzed by HR-EI-MS spectra. The result is shown below:

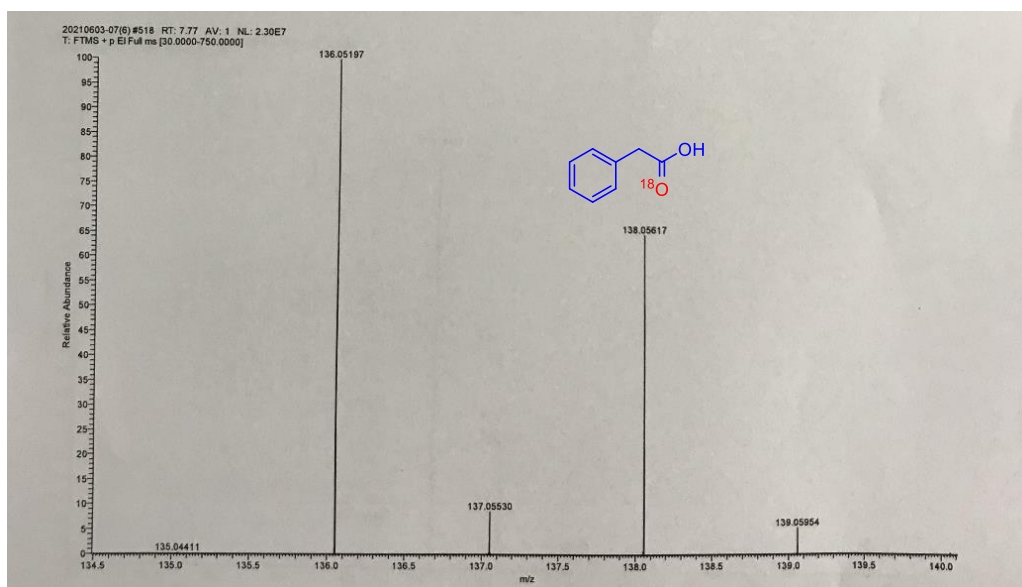

**Figure S1** The  $^{18}\text{O}$ -labeled result.

## 10. Green chemistry metrics analysis

**Table S6. E-Factor, AE, RME, PMI, CE and atom efficiency for 1e, 1ae, 1af and 1ag using 2,2'-DPPA (This Work):**

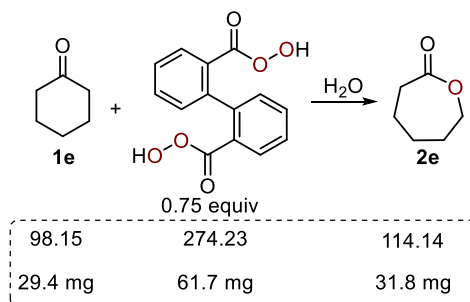

Total amount of reactants: 29.4 mg + 61.7 mg = 91.1 mg

Amount of final product: 31.8 mg

Amount of waste: 91.1 mg - 31.8 mg = 59.3 mg

**E-Factor** = Amount of waste/Amount of product = 59.3/31.8 = 1.86

Molecular weight of product: 114.14

Sum of molecular weight of reagent: 98.15 + 274.23 × 0.75 = 303.82

**Atom economy** = Molecular weight of product/Sum of molecular weight of reagent = 114.14/303.82 = 37.6%

Mass of product: 31.8 mg

Total mass of reagent: 29.4 mg + 61.7 mg = 91.1 mg

**RME** = Mass of product/Total mass of reagent = 31.8 mg/ 91.1 mg = 34.9%

Total mass in process: 29.4 mg + 61.7 mg = 91.1 mg

Mass of product: 31.8 mg

**PMI** = Total mass in process/Mass of product = 91.1/31.8 = 2.86

Amount of carbon in desired product : 6

Total amount of carbon present in all reactants: 6 + 14 × 0.75 = 16.5

**Carbon Efficiency (%)** =  $\frac{\text{amount of carbon in desired product}}{\text{total amount of carbon present in all reactants}} \times 100\% = \frac{6}{16.5} \times 100\% = 36.4\%$

Yield of product: 93%

Atom economy: 37.6%

**Atom Efficiency (%)** = (% yield of product × % atom economy) × 100 = (93% × 37.6%) × 100 = 35.0%

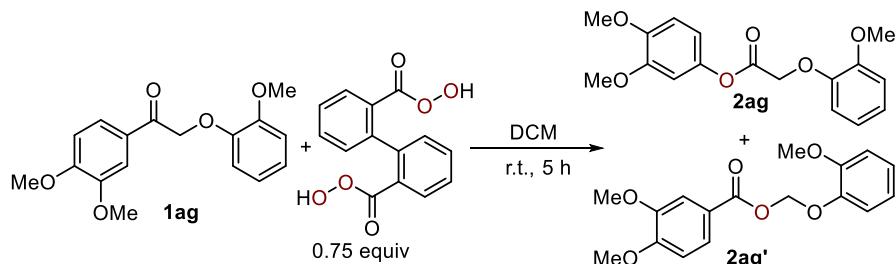

|        |        |        |
|--------|--------|--------|
| 302.33 | 274.23 | 318.33 |
| 151 mg | 103 mg | 150 mg |

Total amount of reactants: 151 mg + 103 mg = 254 mg

Amount of final product: 150 mg

Amount of waste: 254 mg - 150 mg = 104 mg

**E-Factor** = Amount of waste/Amount of product = 104/150 = 0.69

Molecular weight of product: 318.33

Sum of molecular weight of reagent: 302.33 + 274.23 × 0.75 = 508.00

**Atom economy** = Molecular weight of product/Sum of molecular weight of reagent = 318.33/508.00 = 62.7%

Mass of product: 150 mg

Total mass of reagent: 151 mg + 103 mg = 254 mg

**RME** = Mass of product/Total mass of reagent = 150/254 = 59.1%

Total mass in process: 151 mg + 103 mg = 254 mg

Mass of product: 150 mg

**PMI** = Total mass in process/Mass of product = 254/150 = 1.69

Amount of carbon in desired product : 17

Total amount of carbon present in all reactants: 17 + 14 × 0.75 = 28.5

**Carbon Efficiency (%)** =  $\frac{\text{amount of carbon in desired product}}{\text{total amount of carbon present in all reactants}} \times 100\% = \frac{17}{27.5} \times 100\% = 61.8\%$

Yield of product: 94%

Atom economy: 62.7%

**Atom Efficiency (%)** = (% yield of product × % atom economy) × 100 = (94% × 62.7%) × 100 = 58.9%

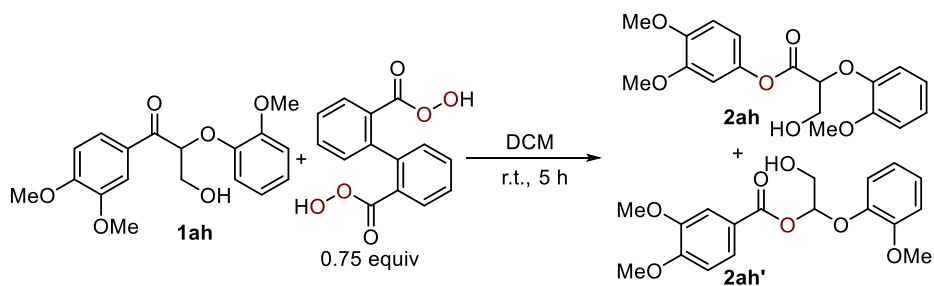

|        |        |        |
|--------|--------|--------|
| 332.35 | 274.23 | 348.35 |
| 166 mg | 103 mg | 152 mg |

Total amount of reactants: 166 mg + 103 mg = 269 mg

Amount of final product: 152 mg

Amount of waste: 269 mg - 152 mg = 117 mg

**E-Factor** = Amount of waste/Amount of product = 117/152 = 0.77

Molecular weight of product: 348.35

Sum of molecular weight of reagent: 332.35 + 274.23 × 0.75 = 538.02

**Atom economy** = Molecular weight of product/Sum of molecular weight of reagent = 348.35/538.02 = 64.7%

Mass of product: 152 mg

Total mass of reagent: 166 mg + 103 mg = 269 mg

**RME** = Mass of product/Total mass of reagent = 152/269 = 57.0 %

Total mass in process: 166 mg + 103 mg = 269 mg

Mass of product: 152 mg

**PMI** = Total mass in process/Mass of product = 269/152 = 1.77

Amount of carbon in desired product : 18

Total amount of carbon presenten in all reactants: 18 + 14 × 0.75 = 28.5

**Carbon Efficiency (%)** =  $\frac{\text{amount of carbon in desired product}}{\text{total amount of carbon presenten in all reactants}} \times 100\% = \frac{18}{28.5} \times 100\% = 63.2\%$

Yield of product: 87%

Atom economy: 64.7%

**Atom Efficiency (%)** = (% yield of product × % atom economy) × 100 = (87% × 64.7%) × 100 = 56.3%

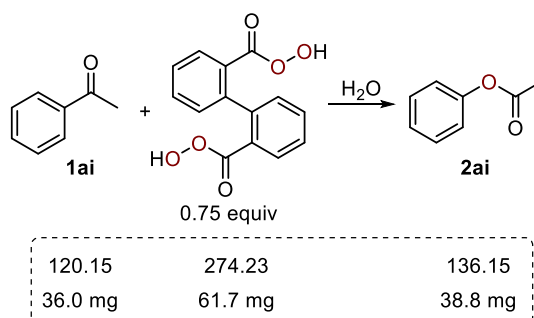

Total amount of reactants: 36.0 mg + 61.7 mg = 97.7 mg

Amount of final product: 38.8 mg

Amount of waste: 97.7 mg - 38.8 mg = 58.9 mg

**E-Factor** = Amount of waste/Amount of product = 58.9/38.8 = 1.52

Molecular weight of product: 136.15

Sum of molecular weight of reagent: 120.15 + 274.23 × 0.75 = 325.8

**Atom economy** = Molecular weight of product/Sum of molecular weight of reagent = 136.15/325.8 = 41.8%

Mass of product:

Total mass of reagent: 36.0 mg + 61.7 mg = 97.7 mg

**RME** = Mass of product/Total mass of reagent = 38.8 mg/ 97.7 mg = 39.7%

Total mass in process: 36.0 mg + 61.7 mg = 97.7 mg

Mass of product: 38.8 mg

**PMI** = Total mass in process/Mass of product = 97.7/38.8 = 2.52

Amount of carbon in desired product : 8

Total amount of carbon present in all reactants: 8 + 14 × 0.75 = 18.5

**Carbon Efficiency (%)** =  $\frac{\text{amount of carbon in desired product}}{\text{total amount of carbon present in all reactants}} \times 100\% = \frac{8}{18.5} \times 100\% = 43.2\%$

Yield of product: 95%

Atom economy: 41.8%

**Atom Efficiency (%)** = (% yield of product × % atom economy) × 100 = (95% × 41.8%) × 100 = 39.7%

**Table S7. E-Factor, AE, RME, PMI, CE and atom efficiency for 1e, 1ae, 1af and 1ag using *m*-CPBA:**

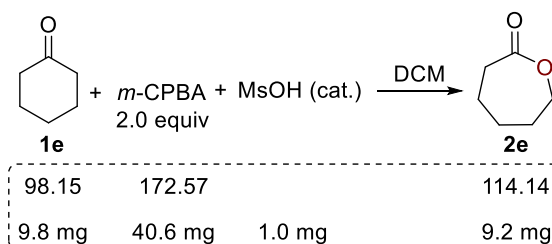

Total amount of reactants: 9.8 mg + 40.6 mg + 1.0 mg = 51.4 mg

Amount of final product: 9.2 mg

Amount of waste: 51.4 - 9.2 mg = 42.2 mg

**E-Factor** = Amount of waste/Amount of product = 42.2/9.2 = 4.59

Molecular weight of product: 114.14

Sum of molecular weight of reagent: 98.15 + 172.57 × 2 = 443.29

**Atom economy** = Molecular weight of product/Sum of molecular weight of reagent = 114.14/443.29 = 25.7%

Mass of product: 9.2 mg

Total mass of reagent: 9.8 mg + 40.6 mg = 50.4 mg

**RME** = Mass of product/Total mass of reagent = 9.2 mg/50.4 mg = 18.3%

Total mass in process: 9.8 mg + 40.6 mg + 1.0 mg = 51.4 mg

Mass of product: 9.2 mg

**PMI** = Total mass in process/Mass of product = 51.4 mg/9.2 mg = 5.59

Amount of carbon in desired product : 6

Total amount of carbon presenten in all reactants: 6 + 7 × 2 = 20

**Carbon Efficiency (%)** =  $\frac{\text{amount of carbon in desired product}}{\text{total amount of carbon presenten in all reactants}} \times 100\% = \frac{6}{20} \times 100\% = 30\%$

Yield of product: 81%

Atom economy: 25.7%

**Atom Efficiency (%)** = (% yield of product × % atom economy) × 100 = (81% × 25.7%) × 100 = 20.8%



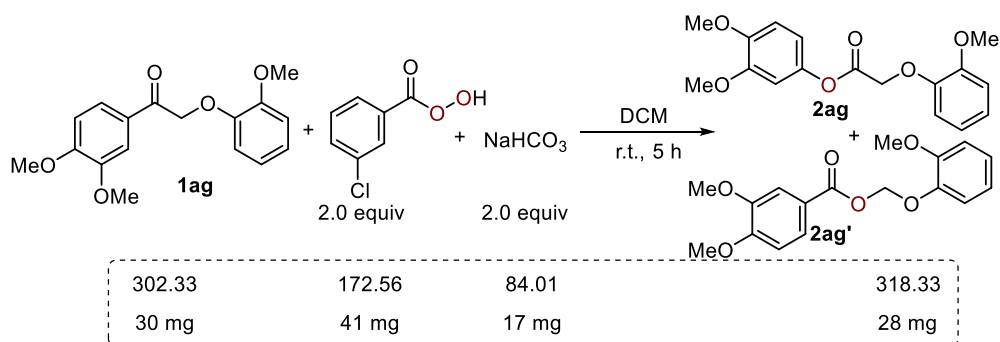

Total amount of reactants: 30mg + 41 mg + 17 mg = 88 mg

Amount of final product: 28mg

Amount of waste: 88mg - 28 mg = 60 mg

E-Factor = Amount of waste/Amount of product = 60/28 = 2.14

Molecular weight of product: 318.33

Sum of molecular weight of reagent: 302.33 + 172.56 × 2 + 84.01 × 2 = 815.47

Atom economy = Molecular weight of product/Sum of molecular weight of reagent = 318.33/815.47 = 39.0%

Mass of product: 28 mg

Total mass of reagent: 30 mg + 41 mg = 71 mg

RME = Mass of product/Total mass of reagent = 28/71 = 39.4%

Total mass in process: 30 mg + 41 mg + 17 mg = 88 mg

Mass of product: 28mg

PMI = Total mass in process/Mass of product = 88/28 = 3.14

Amount of carbon in desired product : 17

Total amount of carbon presenten in all reactants: 17 + 7 × 2 = 28.5

Carbon Efficiency (%) =  $\frac{\text{amount of carbon in desired product}}{\text{total amount of carbon presenten in all reactants}} \times 100\% = \frac{17}{31} \times 100\% = 54.8\%$

Yield of product: 89%

Atom economy: 39.0%

Atom Efficiency (%) = (% yield of product × % atom economy) × 100 = (89% × 39.0%) × 100 = 34.71%

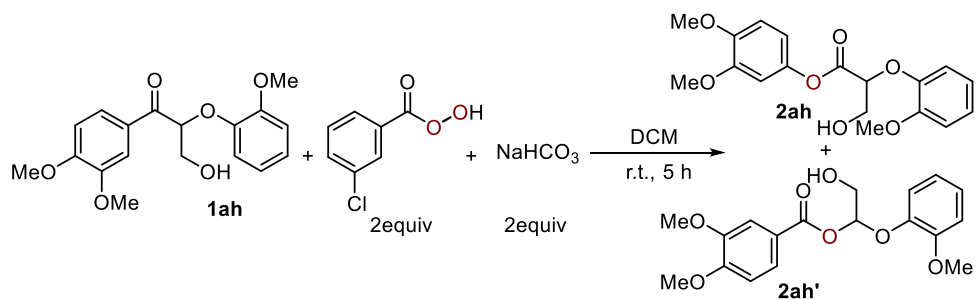

|        |        |       |        |
|--------|--------|-------|--------|
| 332.35 | 172.56 | 84.01 | 348.35 |
| 33 mg  | 41 mg  | 17 mg | 32 mg  |

Total amount of reactants: 33mg + 41 mg + 17 mg = 91 mg

Amount of final product: 32mg

Amount of waste: 91mg - 32 mg = 59 mg

**E-Factor** = Amount of waste/Amount of product = 59/32 = 1.84

Molecular weight of product: 348.35

Sum of molecular weight of reagent:  $332.35 + 172.56 \times 2 + 84.01 \times 2 = 845.49$

**Atom economy** = Molecular weight of product/Sum of molecular weight of reagent = 348.35/845.49 = 41.2%

Mass of product: 32 mg

Total mass of reagent: 33 mg + 41 mg = 74 mg

**RME** = Mass of product/Total mass of reagent = 32/74 = 43.2%

Total mass in process: 33 mg + 41 mg + 17 mg = 91 mg

Mass of product: 32 mg

**PMI** = Total mass in process/Mass of product = 91/32 = 2.84

Amount of carbon in desired product : 18

Total amount of carbon presenten in all reactants:  $18 + 7 \times 2 = 32$

**Carbon Efficiency (%)** =  $\frac{\text{amount of carbon in desired product}}{\text{total amount of carbon presenten in all reactants}} \times 100\% = \frac{18}{32} \times 100\% = 56.3\%$

Yield of product: 92%

Atom economy: 41.2%

**Atom Efficiency (%)** = (% yield of product  $\times$  % atom economy)  $\times$  100 = (92%  $\times$  41.2%)  $\times$  100 = 37.9%

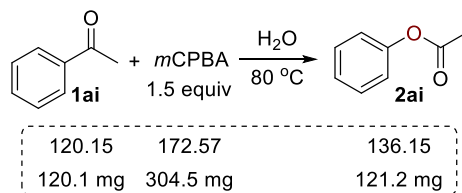

Total amount of reactants: 120.1 mg + 304.5 mg = 424.6 mg

Amount of final product: 121.2 mg

Amount of waste: 424.6 - 121.2 mg = 303.4 mg

**E-Factor** = Amount of waste/Amount of product = 303.4/121.2 = 2.5

Molecular weight of product: 136.15

Sum of molecular weight of reagent: 120.15 + 172.57 × 1.5 = 379.0

**Atom economy** = Molecular weight of product/Sum of molecular weight of reagent = 136.15/379.0 = 35.9%

Mass of product: 121.2 mg

Total mass of reagent: 120.1 mg + 304.5 mg = 424.6 mg

**RME** = Mass of product/Total mass of reagent = 121.2 mg/424.6 mg = 28.5%

Total mass in process: 120.1 mg + 304.5 mg = 424.6 mg

Mass of product: 121.2 mg

**PMI** = Total mass in process/Mass of product = 424.6/121.2 = 3.5

Amount of carbon in desired product : 8

Total amount of carbon present in all reactants: 8 + 7 × 1.5 = 18.5

**Carbon Efficiency (%)** =  $\frac{\text{amount of carbon in desired product}}{\text{total amount of carbon present in all reactants}} \times 100\% = \frac{8}{18.5} \times 100\% = 43.2\%$

Yield of product: 89%

Atom economy: 35.9%

**Atom Efficiency (%)** = (% yield of product × % atom economy) × 100 = (89% × 35.9%) × 100 = 32.0%

**Table S8. E-Factor, AE, RME, PMI, CE and atom efficiency for 1e, 1ae, 1af and 1ag using H<sub>2</sub>O<sub>2</sub>:**

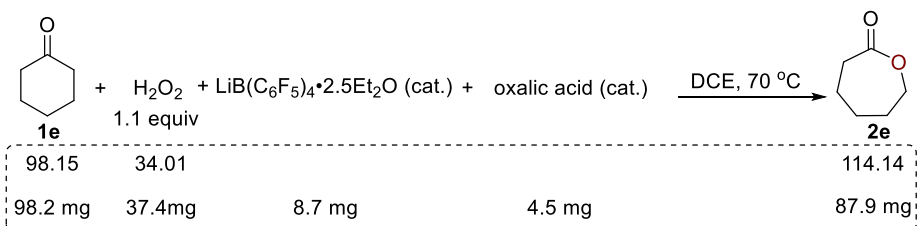

Total amount of reactants: 98.2 mg + 37.4 mg + 8.7 mg + 4.5 mg = 148.8 mg

Amount of final product: 89.7 mg

Amount of waste: 148.8 mg - 89.7 mg = 59.1 mg

**E-Factor** = Amount of waste/Amount of product = 59.1/ 89.7 = **0.66**

Molecular weight of product: 114.14

Sum of molecular weight of reagent: 98.15 + 34.01 × 1.1 = 135.55

**Atom economy** = Molecular weight of product/Sum of molecular weight of reagent = 114.14/135.55 = **84.2%**

Mass of product: 87.9 mg

Total mass of reagent: 98.2 mg + 37.4 mg mg = 135.6 mg

**RME** = Mass of product/Total mass of reagent = 87.9 mg/135.6 mg = **64.8%**

Total mass in process: 98.2 mg + 37.4 mg + 8.7 mg + 4.5 mg = 148.8 mg

Mass of product: 89.7 mg

**PMI** = Total mass in process/Mass of product = 148.8/89.7 = **1.66**

Amount of carbon in desired product : 6

Total amount of carbon presenten in all reactants: 6

**Carbon Efficiency (%)** =  $\frac{\text{amount of carbon in desired product}}{\text{total amount of carbon presenten in all reactants}} \times 100\% = \frac{6}{6} \times 100\% = 100\%$

Yield of product: 77%

Atom economy: 84.2%

**Atom Efficiency (%)** = (% yield of product × % atom economy) × 100 = (77% × 84.2%) × 100 = **64.8%**

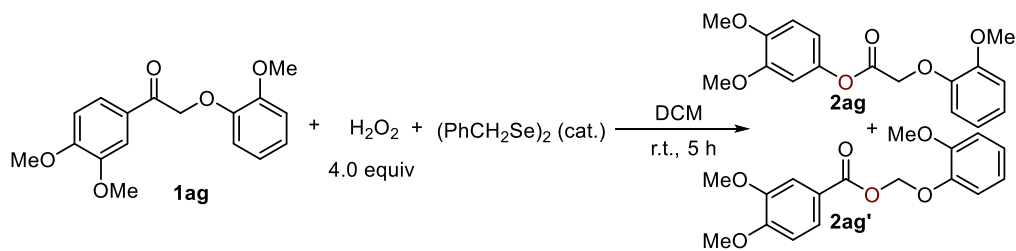

|        |         |        |        |
|--------|---------|--------|--------|
| 302.33 | 34.01   |        | 318.33 |
| 30 mg  | 13.6 mg | 1.7 mg | 29 mg  |

Total amount of reactants: 30 mg + 13.6 mg + 1.7 mg = 45.3 mg

Amount of final product: 29 mg

Amount of waste: 45.3 mg - 29 mg = 16.3 mg

E-Factor = Amount of waste/Amount of product = 16.3/29 = 0.56

Molecular weight of product: 318.33

Sum of molecular weight of reagent: 302.33 + 34.01 × 4 = 438.37

Atom economy = Molecular weight of product/Sum of molecular weight of reagent = 318.33/438.37 = 72.6%

Mass of product: 29 mg

Total mass of reagent: 30 mg + 13.6 mg = 43.6 mg

RME = Mass of product/Total mass of reagent = 29/43.6 = 66.5%

Total mass in process: 30 mg + 13.6 mg + 1.7 mg = 45.3 mg

Mass of product: 29 mg

PMI = Total mass in process/Mass of product = 45.3/29 = 1.56

Amount of carbon in desired product : 17

Total amount of carbon presenten in all reactants: 17

Carbon Efficiency (%) =  $\frac{\text{amount of carbon in desired product}}{\text{total amount of carbon presenten in all reactants}} \times 100\% = \frac{17}{17} \times 100\% = 100\%$

Yield of product: 92%

Atom economy: 41.2%

Atom Efficiency (%) = (% yield of product × % atom economy) × 100 = (91% × 72.6%) × 100 = 66.1%

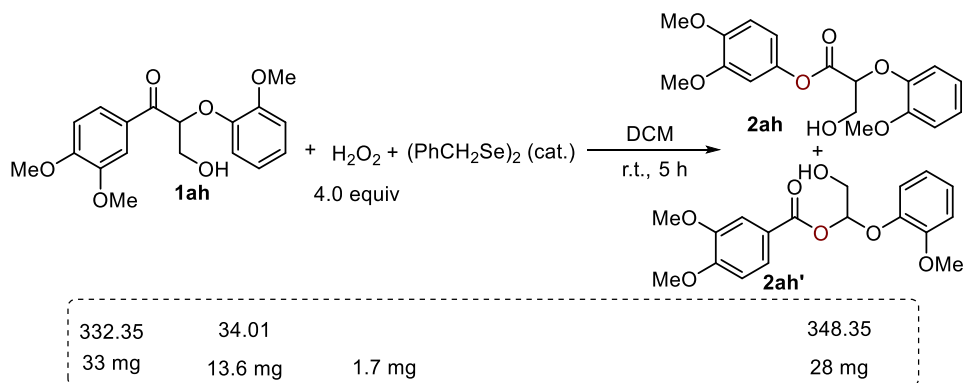

Total amount of reactants: 33mg + 13.6 mg + 1.7 mg = 48.3 mg

Amount of final product: 28 mg

Amount of waste: 48.3 mg - 28 mg = 20.3 mg

**E-Factor** = Amount of waste/Amount of product = 20.3/28 = 0.73

Molecular weight of product: 348.35

Sum of molecular weight of reagent: 332.35 + 34.01 × 4 = 468.39

**Atom economy** = Molecular weight of product/Sum of molecular weight of reagent = 348.35/468.39 = 74.4%

Mass of product: 28 mg

Total mass of reagent: 33 mg + 13.6 mg = 46.6 mg

**RME** = Mass of product/Total mass of reagent = 28/46.6 = 60.1%

Total mass in process: 33 mg + 13.6 mg + 1.7 mg = 48.3 mg

Mass of product: 28 mg

**PMI** = Total mass in process/Mass of product = 48.3/28 = 1.73

Amount of carbon in desired product : 18

Total amount of carbon present in all reactants: 18

**Carbon Efficiency (%)** =  $\frac{\text{amount of carbon in desired product}}{\text{total amount of carbon present in all reactants}} \times 100\% = \frac{18}{18} \times 100\% = 100\%$

Yield of product: 81%

Atom economy: 74.4%

**Atom Efficiency (%)** = (% yield of product × % atom economy) × 100 = (81% × 74.4%) × 100 = 60.3%

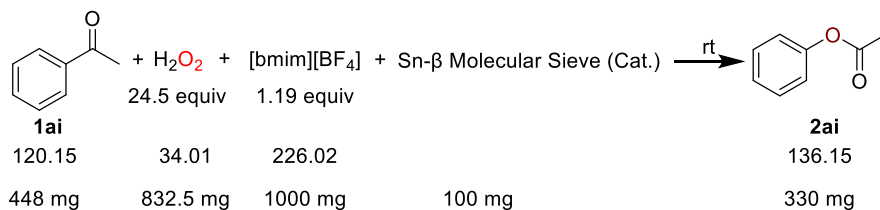

Total amount of reactants: 448 mg + 832.5 mg + 1000 mg + 100 mg = 2380.5 mg

Amount of final product: 330 mg

Amount of waste: 2380.5 mg - 330 mg = 2030.5 mg

**E-Factor** = Amount of waste/Amount of product = 2030.5/330 = **6.21**

Molecular weight of product: 136.15

Sum of molecular weight of reagent: 120.15 + 34.01 × 24.5 + 226.02 × 1.19 = 1,222.34

**Atom economy** = Molecular weight of product/Sum of molecular weight of reagent = 136.15/1,222.34 = **11.1%**

Mass of product: 330 mg

Total mass of reagent: 448 mg + 832.5 mg + 1000 mg = 2280.5 mg

**RME** = Mass of product/Total mass of reagent = 330/2280.5 = **14.5%**

Total mass in process: 448 mg + 832.5 mg + 1000 mg + 100 mg = 2380.5 mg

Mass of product: 330 mg

**PMI** = Total mass in process/Mass of product = 2380.5/330 = **7.21**

Amount of carbon in desired product : 8

Total amount of carbon presenten in all reactants: 8 + 8 × 1.19 = 17.52

**Carbon Efficiency (%)** =  $\frac{\text{amount of carbon in desired product}}{\text{total amount of carbon presenten in all reactants}} \times 100\% = \frac{8}{17.52} \times 100\% = 45.7\%$

Yield of product: 72%

Atom economy: 11.1%

**Atom Efficiency (%)** = (% yield of product × % atom economy) × 100 = (72% × 11.1%) × 100 = **8.0%**

## 11. Biomolecule-Compatibility Experiments

To a solution of 4-Phenylcyclohexanone (34.8 mg, 0.2 mmol), 2,2'-DPPA (0.2 mmol, 55 mg) and additives (0.2 mmol) in 1XPBS, and stirred at room temperature.

**Table S9. Compatibility with Biomolecules in 1× PBS**

Reaction scheme: 4-Phenylcyclohexanone (1a) + 2,2'-DPPA in 1XPBS, r.t., 10 h → 4-Phenyl-2-oxo-1,3-dioxane (2a)

| Entry | Additive | yield of <b>c</b> (%) <sup>a</sup> | Additive remaining (%) |
|-------|----------|------------------------------------|------------------------|
| 1     |          | 97                                 | 99 <sup>b</sup>        |
| 2     |          | 94                                 | 95 <sup>a</sup>        |
| 3     |          | 93                                 | 77 <sup>c</sup>        |
| 4     |          | 94                                 | 69 <sup>c</sup>        |
| 5     |          | 87                                 | 85 <sup>c</sup>        |
| 6     |          | 97                                 | 75 <sup>c</sup>        |

Reaction conditions: 1g (0.2 mmol, 34.8 mg), 2,2'-DPPA (0.2 mmol, 55 mg), additives (0.2 mmol, 1 equiv.) in 2 mL 1× PBS. <sup>a</sup>Isolated yields. <sup>a</sup>additive remaining was determined by LC-MS. <sup>c</sup> additives remaining were determined by <sup>1</sup>H NMR analysis.



### 11.1 The stability of nucleic acids in the oxidation

**1a** (0.004 mmol, 0.7 mg), 2,2'-DPPA (0.0024mol, 0.7 mg) and 20  $\mu$ L pCVD442 were oscillation in 40  $\mu$ L 1XPBS for 10 h. Then a portion of the reaction mixture was extracted with EA then subjected to GC analysis monitored 254 nm, internal standard is naphthalene. The agarose gel electrophoresis was conducted to confirm the pCVD442 was not degraded.

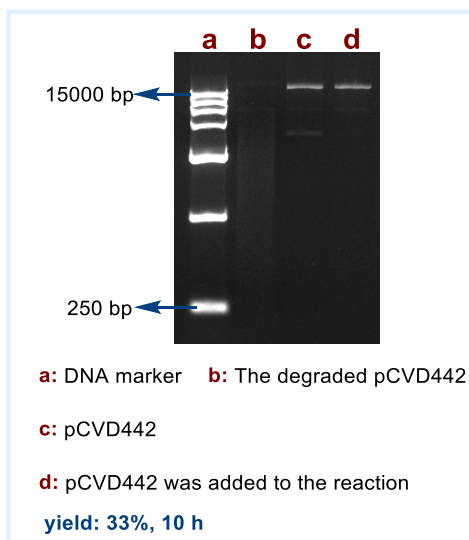

Figure S2. The electrophoretic of pCVD442

### 11.2 The stability of proteins in the oxidation

**1a** (0.001 mmol, 0.17 mg), 2,2'-DPPA (0.0006 mmol, 0.16 mg) and 10 mg (0.15  $\mu$ mol) Bovine serum albumin were oscillation in 10 mL 1XPBS for 10 h. Then a portion of the reaction mixture was extracted with EA then subjected to GC analysis monitored 254 nm, internal standard is naphthalene. The other reaction mixture was diluted four times, and the amount of albumin bovine serum remaining was determined by BCA Protein Assay Ki (Bio TeKe).

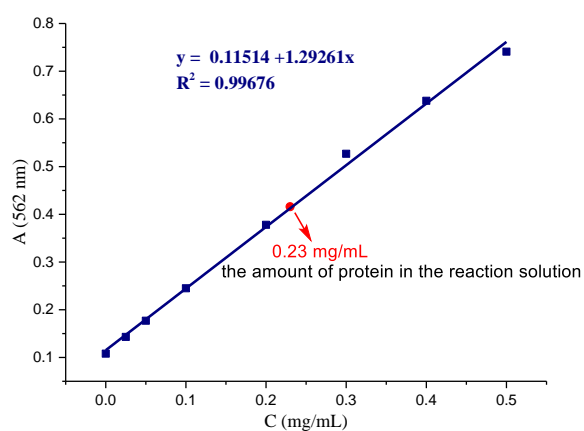

Figure S3. BSA concentration test by BCA Protein Assay Ki

### 11.3 The activity of DNase I in the reaction

We treated 100  $\mu\text{M}$  of **1g**, 55  $\mu\text{M}$  of 2,2'-DPPA and 0.032  $\mu\text{M}$  DNase I were oscillation in 1XPBS for 10 h. Then a portion of the reaction mixture was extracted with EA then subjected to GC analysis monitored 254 nm, internal standard is naphthalene. 10  $\mu\text{L}$  the reaction mixture was added 10  $\mu\text{L}$  pCVD442, incubated at 37  $^{\circ}\text{C}$  for 3 h, then examined by agarose gel electrophoresis.

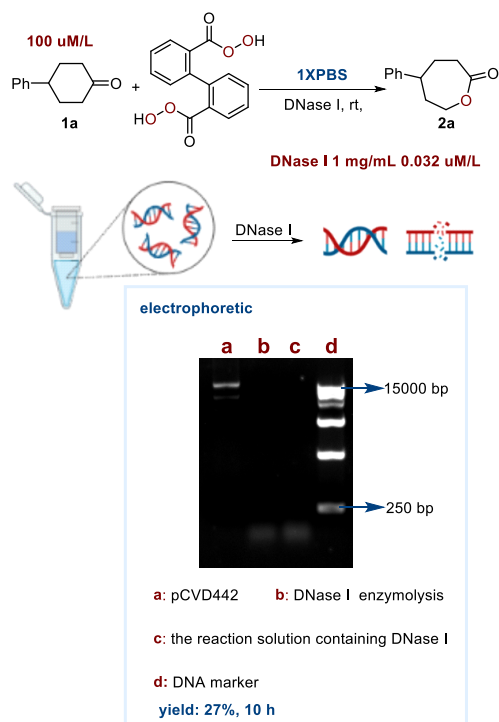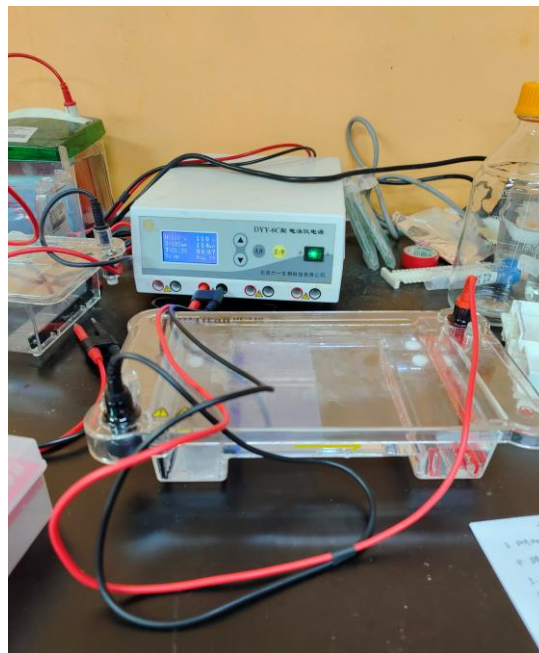

Figure S4. The activity of DNase I

## 12. Physical data

### 5-phenyloxepan-2-one (2a)

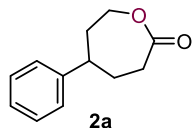

$^1\text{H}$  NMR (400 MHz, Chloroform-*d*)  $\delta$  7.32 (dd,  $J = 8.1, 6.7$  Hz, 2H), 7.25 – 7.21 (m, 1H), 7.20 – 7.16 (m, 2H), 4.42 – 4.26 (m, 2H), 2.90 – 2.72 (m, 3H), 2.15 – 2.01 (m, 3H), 1.89 – 1.82 (m, 1H).  $^{13}\text{C}$  NMR (101 MHz,  $\text{CDCl}_3$ )  $\delta$  174.8, 144.1, 127.9, 126.0, 125.7, 67.4, 46.4, 35.9, 32.8, 29.4.

### 5-(*m*-tolyl) oxepan-2-one (2b)

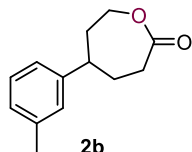

$^1\text{H}$  NMR (400 MHz, Chloroform-*d*)  $\delta$  7.21 (t,  $J = 7.5$  Hz, 1H), 7.10 – 6.92 (m, 3H), 4.42 – 4.24 (m, 2H), 2.87 – 2.65 (m, 3H), 2.34 (s, 3H), 2.18 – 1.94 (m, 3H), 1.83 (d,  $J = 12.3$  Hz, 1H).  $^{13}\text{C}$  NMR (101 MHz,  $\text{CDCl}_3$ )  $\delta$  175.9, 145.0, 138.5, 128.7, 127.7, 127.5, 123.7, 68.4, 47.3, 36.8, 33.8, 30.4, 21.6.

### 5-(3-fluorophenyl)oxepan-2-one (2c)

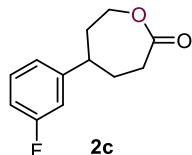

$^1\text{H}$  NMR (400 MHz, Chloroform-*d*)  $\delta$  7.32 – 7.23 (m, 1H), 7.06 – 6.77 (m, 3H), 4.44 – 4.24 (m, 2H), 2.91 – 2.68 (m, 3H), 2.19 – 1.91 (m, 3H), 1.87 – 1.73 (m, 1H).  $^{13}\text{C}$  NMR (101 MHz,  $\text{CDCl}_3$ )  $\delta$  175.6, 164.3, 161.9, 147.5 (d,  $J = 7.0$  Hz), 130.4 (d,  $J = 8.3$  Hz), 122.4 (d,  $J = 2.9$  Hz), 113.8 (dd,  $J = 17.0$  Hz), 68.1, 47.0, 36.7, 33.7, 30.3.

### 5-(4-hydroxyphenyl)oxepan-2-one (2d)

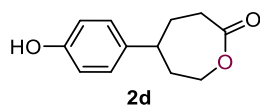

$^1\text{H}$  NMR (400 MHz,  $\text{DMSO-}d_6$ )  $\delta$  9.23 (s, 1H), 7.04 (d,  $J = 8.5$  Hz, 2H), 6.69 (d,  $J = 8.5$  Hz, 2H), 4.40 (dd,  $J = 12.9, 10.4$  Hz, 1H), 4.23 (m,  $J = 12.9, 5.5, 1.9$  Hz, 1H),

2.93 (t,  $J = 12.5$  Hz, 1H), 2.85 – 2.72 (m, 1H), 2.53 (d,  $J = 6.6$  Hz, 1H), 1.98 (dt,  $J = 16.6$ , 4.1 Hz, 1H), 1.92 – 1.73 (m, 2H), 1.61 (q,  $J = 12.6$  Hz, 1H).  $^{13}\text{C}$  NMR (101 MHz, DMSO)  $\delta$  175.5, 155.8, 136.2, 127.5, 115.1, 67.6, 45.0, 36.7, 33.2, 30.2.

**oxepan-2-one (2e)**

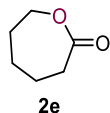

$^1\text{H}$  NMR (400 MHz, Chloroform-*d*)  $\delta$  4.26 – 4.16 (m, 2H), 2.63 (d,  $J = 7.2$  Hz, 2H), 1.85 (s, 2H), 1.75 (d,  $J = 6.0$  Hz, 4H).  $^{13}\text{C}$  NMR (101 MHz,  $\text{CDCl}_3$ )  $\delta$  176.4, 69.4, 34.7, 29.4, 29.1, 23.0.

**5-methyloxepan-2-one (2f)**

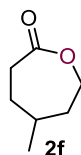

$^1\text{H}$  NMR (400 MHz, Chloroform-*d*)  $\delta$  4.29 – 4.20 (m, 1H), 4.15 (dd,  $J = 12.9$ , 10.3 Hz, 1H), 2.72 – 2.49 (m, 2H), 1.96 – 1.80 (m, 2H), 1.73 (m,  $J = 11.0$ , 7.1, 3.8 Hz, 1H), 1.55 – 1.41 (m, 1H), 1.38 – 1.23 (m, 1H), 0.96 (dd,  $J = 6.6$ , 1.4 Hz, 3H).  $^{13}\text{C}$  NMR (101 MHz,  $\text{CDCl}_3$ )  $\delta$  176.2, 68.2, 37.3, 35.3, 33.3, 30.8, 22.2.

**5-(tert-butyl)oxepan-2-one (2g)**

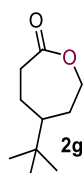

$^1\text{H}$  NMR (400 MHz, Chloroform-*d*)  $\delta$  4.30 (m,  $J = 12.9$ , 5.9, 1.8 Hz, 1H), 4.12 (dd,  $J = 12.9$ , 10.4 Hz, 1H), 2.67 (m,  $J = 14.3$ , 7.5, 1.5 Hz, 1H), 2.54 (m,  $J = 14.0$ , 11.7, 2.1 Hz, 1H), 2.12 – 1.93 (m, 2H), 1.48 (m,  $J = 15.5$ , 12.0, 10.4, 1.9 Hz, 1H), 1.37 – 1.27 (m, 2H), 0.86 (s, 9H).  $^{13}\text{C}$  NMR (101 MHz,  $\text{CDCl}_3$ )  $\delta$  176.4, 68.7, 50.8, 33.5, 33.0, 30.4, 27.5, 23.8.

**ethyl 7-oxooxepane-4-carboxylate (2h)**

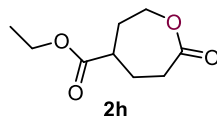

$^1\text{H}$  NMR (400 MHz, Chloroform-*d*)  $\delta$  4.35 (m,  $J = 13.3, 7.1, 1.7$  Hz, 1H), 4.26 – 4.07 (m, 3H), 2.84 – 2.53 (m, 3H), 2.21 – 2.00 (m, 3H), 1.92 (m,  $J = 14.7, 11.2, 9.3, 1.8$  Hz, 1H), 1.24 (t,  $J = 7.1$  Hz, 3H).  $^{13}\text{C}$  NMR (101 MHz,  $\text{CDCl}_3$ )  $\delta$  175.2, 173.7, 66.8, 61.0, 44.1, 32.2, 31.4, 24.9, 14.2.

**N-(7-oxooxepan-4-yl)acetamide (2i)**

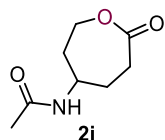

$^1\text{H}$  NMR (400 MHz,  $\text{DMSO-}d_6$ )  $\delta$  7.95 (d,  $J = 7.7$  Hz, 1H), 4.38 – 4.14 (m, 2H), 3.89 (dt,  $J = 8.1, 4.1$  Hz, 1H), 2.74 (m,  $J = 14.0, 11.9, 1.8$  Hz, 1H), 2.57 – 2.48 (m, 1H), 2.01 (m,  $J = 16.0, 4.9$  Hz, 1H), 1.95 – 1.86 (m, 1H), 1.81 (s, 3H), 1.67 – 1.54 (m, 1H), 1.51 – 1.36 (m, 1H).  $^{13}\text{C}$  NMR (101 MHz,  $\text{DMSO}$ )  $\delta$  175.2, 168.4, 65.2, 48.1, 34.8, 30.1, 28.3, 22.7. HRMS (ESI),  $m/z$  calcd for  $\text{C}_8\text{H}_{14}\text{NO}_3$   $[\text{M} + \text{H}]^+$ : 172.0969; found: 172.0969.

**(1R,3r,8S)-4-oxatricyclo[4.3.1.1<sup>3,8</sup>]undecan-5-one (2j)**

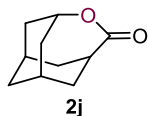

$^1\text{H}$  NMR (400 MHz, Chloroform-*d*)  $\delta$  4.43 (s, 1H), 3.01 (s, 1H), 2.05 (s, 2H), 1.96 (s, 4H), 1.87 (d,  $J = 14.2$  Hz, 2H), 1.79 (s, 2H), 1.68 (s, 2H).  $^{13}\text{C}$  NMR (101 MHz,  $\text{CDCl}_3$ )  $\delta$  179.0, 73.2, 41.2, 35.7, 33.7, 30.9, 25.8.

**7-phenyloxepan-2-one (2k)**

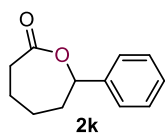

$^1\text{H}$  NMR (400 MHz, Chloroform-*d*)  $\delta$  7.39 (m, 5H), 5.32 (d,  $J = 9.3$  Hz, 1H), 2.78 (t,  $J = 5.9$  Hz, 2H), 2.20 – 1.97 (m, 4H), 1.88 – 1.63 (m, 2H).  $^{13}\text{C}$  NMR (101 MHz,  $\text{CDCl}_3$ )  $\delta$  175.0, 140.8, 128.6, 128.1, 125.9, 82.1, 37.5, 35.0, 28.6, 22.9.

**4,5-dihydrobenzo[b]oxepin-2(3H)-one (2l)**

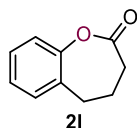

$^1\text{H}$  NMR (400 MHz, Chloroform-*d*)  $\delta$  7.34 – 7.27 (m, 1H), 7.25 – 7.15 (m, 2H), 7.11 (d,  $J = 7.9$  Hz, 1H), 2.86 (t,  $J = 7.3$  Hz, 2H), 2.50 (t,  $J = 7.2$  Hz, 2H), 2.22 (q,  $J = 7.3$  Hz, 2H).  $^{13}\text{C}$  NMR (101 MHz,  $\text{CDCl}_3$ )  $\delta$  171.8, 151.9, 130.2, 129.8, 128.4, 126.0, 119.4, 31.2, 28.4, 26.6.

**(4R,7S)-7-isopropyl-4-methyloxepan-2-one (2m)**

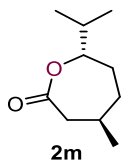

$^1\text{H}$  NMR (400 MHz, Chloroform-*d*)  $\delta$  4.01 (dd,  $J = 9.2, 4.4$  Hz, 1H), 2.59 – 2.37 (m, 2H), 1.95 – 1.72 (m, 4H), 1.62 – 1.48 (m, 1H), 1.33 – 1.18 (m, 1H), 1.03 – 0.97 (m, 3H), 0.93 (t,  $J = 6.2$  Hz, 6H).  $^{13}\text{C}$  NMR (101 MHz,  $\text{CDCl}_3$ )  $\delta$  175.1, 84.8, 42.6, 37.5, 33.3, 31.0, 30.4, 24.0, 18.4, 17.1.

**5-(2-hydroxyethyl)dihydrofuran-2(3H)-one (2n)**

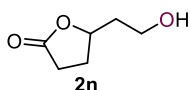

$^1\text{H}$  NMR (400 MHz, Chloroform-*d*)  $\delta$  4.74 – 4.57 (m, 1H), 3.71 (td,  $J = 6.7, 2.2$  Hz, 2H), 2.92 (dd,  $J = 14.2, 8.6$  Hz, 2H), 2.56 – 2.43 (m, 2H), 2.33 (m,  $J = 13.4, 6.7$  Hz, 1H), 1.86 (td,  $J = 12.4, 6.3$  Hz, 3H).  $^{13}\text{C}$  NMR (101 MHz,  $\text{CDCl}_3$ )  $\delta$  177.8, 78.7, 58.7, 38.1, 28.7, 28.0.

**1,4-dioxepan-5-one (2o)**

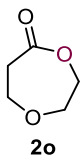

$^1\text{H}$  NMR (400 MHz, Chloroform-*d*)  $\delta$  4.37 – 4.27 (m, 2H), 3.96 – 3.88 (m, 2H), 3.88 – 3.80 (m, 2H), 2.96 – 2.85 (m, 2H).  $^{13}\text{C}$  NMR (101 MHz,  $\text{CDCl}_3$ )  $\delta$  174.2, 70.8, 70.4, 64.8, 39.4.

**dihydrofuran-2(3H)-one (2p)**

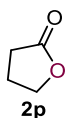

$^1\text{H}$  NMR (400 MHz, Chloroform-*d*)  $\delta$  4.18 (t,  $J = 7.7$  Hz, 2H), 2.32 (t,  $J = 7.9$  Hz, 2H),

2.21 – 2.03 (m, 2H).  $^{13}\text{C}$  NMR (101 MHz,  $\text{CDCl}_3$ )  $\delta$  177.7, 68.3, 27.4, 21.8.

**4-phenyldihydrofuran-2(3H)-one (2q)**

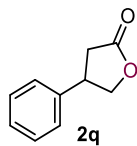

$^1\text{H}$  NMR (400 MHz, Chloroform-*d*)  $\delta$  7.41 (dd,  $J = 8.2, 6.6$  Hz, 2H), 7.37 – 7.31 (m, 1H), 7.27 (dd,  $J = 7.3, 1.7$  Hz, 2H), 4.70 (dd,  $J = 9.0, 7.9$  Hz, 1H), 4.30 (dd,  $J = 9.0, 8.0$  Hz, 1H), 3.83 (p,  $J = 8.4$  Hz, 1H), 2.96 (dd,  $J = 17.5, 8.7$  Hz, 1H), 2.71 (dd,  $J = 17.5, 9.1$  Hz, 1H).  $^{13}\text{C}$  NMR (101 MHz,  $\text{CDCl}_3$ )  $\delta$  176.6, 139.5, 129.2, 127.8, 126.8, 74.1, 41.1, 35.8.

**tetrahydro-2H-pyran-2-one (2r)**

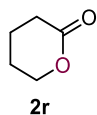

$^1\text{H}$  NMR (400 MHz, Chloroform-*d*)  $\delta$  4.21 – 4.06 (m, 2H), 2.39 – 2.26 (m, 2H), 1.81 – 1.57 (m, 4H).  $^{13}\text{C}$  NMR (101 MHz,  $\text{CDCl}_3$ )  $\delta$  171.1, 69.1, 29.4, 21.8, 18.6.

**isochroman-3-one (2s)**

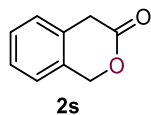

$^1\text{H}$  NMR (400 MHz, Chloroform-*d*)  $\delta$  7.34 – 7.27 (m, 1H), 7.25 – 7.15 (m, 2H), 7.11 (d,  $J = 7.9$  Hz, 1H), 2.86 (t,  $J = 7.3$  Hz, 2H), 2.50 (t,  $J = 7.2$  Hz, 2H), 2.22 (q,  $J = 7.3$  Hz, 2H).  $^{13}\text{C}$  NMR (101 MHz,  $\text{CDCl}_3$ )  $\delta$  171.8, 151.9, 130.2, 129.8, 128.4, 126.0, 119.4, 31.2, 28.4, 26.6.

**oxocan-2-one (2t)**

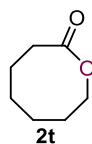

$^1\text{H}$  NMR (400 MHz, Chloroform-*d*)  $\delta$  4.41 – 4.30 (m, 2H), 2.59 – 2.50 (m, 2H), 1.83 (m,  $J = 25.1, 5.7$  Hz, 4H), 1.67 – 1.52 (m, 4H).  $^{13}\text{C}$  NMR (101 MHz,  $\text{CDCl}_3$ )  $\delta$  177.0, 68.0, 31.4, 31.0, 28.5, 25.9, 24.0.

**oxacyclotridecan-2-one (2u)**

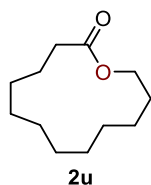

$^1\text{H}$  NMR (400 MHz, Chloroform-*d*)  $\delta$  4.19 – 4.10 (m, 2H), 2.41 – 2.29 (m, 2H), 1.72 – 1.59 (m, 4H), 1.43 – 1.29 (m, 14H).  $^{13}\text{C}$  NMR (101 MHz,  $\text{CDCl}_3$ )  $\delta$  174.4, 64.7, 34.8, 27.5, 26.7, 26.5, 26.5, 25.5, 25.4, 25.0, 24.6, 24.3.

**oxacyclohexadecan-2-one (2v)**

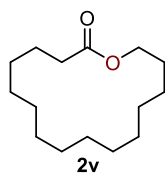

$^1\text{H}$  NMR (400 MHz, Chloroform-*d*)  $\delta$  4.12 (t,  $J = 5.5$  Hz, 2H), 2.31 (t,  $J = 6.8$  Hz, 2H), 1.63 (m, 4H), 1.30 (m, 20H).  $^{13}\text{C}$  NMR (101 MHz,  $\text{CDCl}_3$ )  $\delta$  174.2, 64.1, 34.5, 28.5, 27.8, 27.2, 27.2, 27.0, 26.7, 26.4, 26.1, 26.0, 25.9, 25.2, 25.0.

**phenyl benzoate (2w)**

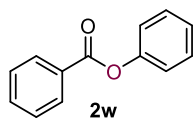

$^1\text{H}$  NMR (400 MHz, Chloroform-*d*)  $\delta$  8.31 – 8.22 (m, 2H), 7.72 – 7.64 (m, 1H), 7.56 (t,  $J = 7.6$  Hz, 2H), 7.48 (t,  $J = 7.8$  Hz, 2H), 7.37 – 7.23 (m, 3H).  $^{13}\text{C}$  NMR (101 MHz,  $\text{CDCl}_3$ )  $\delta$  165.3, 151.1, 133.7, 130.3, 129.67, 129.6, 128.7, 126.0, 121.8.

**benzyl 2-phenylacetate (2x)**

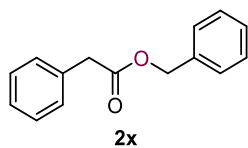

$^1\text{H}$  NMR (400 MHz, Chloroform-*d*)  $\delta$  7.40 (dd,  $J = 9.3, 4.0$  Hz, 10H), 5.22 (s, 2H), 3.76 (s, 2H).  $^{13}\text{C}$  NMR (101 MHz,  $\text{CDCl}_3$ )  $\delta$  171.5, 135.9, 134.0, 130.4, 128.6, 128.6, 128.3, 128.2, 127.2, 66.7, 41.4.

**cyclohexyl benzoate (2y)**



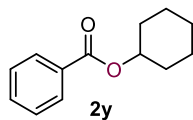

$^1\text{H}$  NMR (400 MHz, Chloroform-*d*)  $\delta$  8.06 (d,  $J = 7.6$  Hz, 2H), 7.54 (t,  $J = 7.4$  Hz, 1H), 7.43 (t,  $J = 7.6$  Hz, 2H), 5.04 (m,  $J = 8.6, 3.8$  Hz, 1H), 1.94 (d,  $J = 12.4$  Hz, 2H), 1.80 (d,  $J = 13.4$  Hz, 2H), 1.60 (q,  $J = 9.3$  Hz, 3H), 1.53 – 1.35 (m, 3H).  $^{13}\text{C}$  NMR (101 MHz,  $\text{CDCl}_3$ )  $\delta$  166.1, 132.8, 131.1, 129.6, 128.4, 77.3, 73.1, 31.7, 25.6, 23.8.

### 3-phenylpropanoic acid (2z)

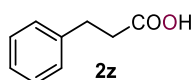

$^1\text{H}$  NMR (400 MHz, Chloroform-*d*)  $\delta$  9.26 (d,  $J = 608.6$  Hz, 1H), 7.41 – 7.32 (m, 2H), 7.32 – 7.21 (m, 3H), 3.02 (t,  $J = 7.8$  Hz, 2H), 2.75 (t,  $J = 7.8$  Hz, 2H).  $^{13}\text{C}$  NMR (101 MHz,  $\text{CDCl}_3$ )  $\delta$  179.49, 140.27, 128.69, 128.39, 126.51, 77.48, 77.16, 76.84, 35.75, 30.67.

### 1-phenylethyl formate (2aa)

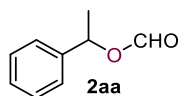

$^1\text{H}$  NMR (400 MHz, Chloroform-*d*)  $\delta$  8.10 (s, 1H), 7.42 – 7.28 (m, 5H), 6.02 (qd,  $J = 6.6, 1.1$  Hz, 1H), 1.60 (d,  $J = 6.6$  Hz, 3H).  $^{13}\text{C}$  NMR (101 MHz,  $\text{CDCl}_3$ )  $\delta$  160.51, 141.01, 128.72, 128.28, 126.28, 77.48, 77.16, 76.84, 72.36, 22.24.

### 4-chlorophenol (2ab)

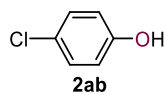

$^1\text{H}$  NMR (400 MHz, Chloroform-*d*)  $\delta$  7.19 (d,  $J = 8.5$  Hz, 2H), 6.77 (d,  $J = 8.7$  Hz, 2H), 5.02 (s, 1H).  $^{13}\text{C}$  NMR (101 MHz,  $\text{CDCl}_3$ )  $\delta$  154.33, 129.65, 125.72, 116.80, 77.48, 77.16, 76.84.

### (E)-styryl benzoate (2ac)

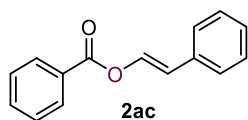

$^1\text{H}$  NMR (400 MHz, Chloroform-*d*)  $\delta$  8.15 (dd,  $J = 8.4, 1.4$  Hz, 2H), 8.10 (d,  $J = 12.7$  Hz, 1H), 7.62 (d,  $J = 7.4$  Hz, 1H), 7.50 (dd,  $J = 8.3, 7.1$  Hz, 2H), 7.42 – 7.38 (m, 2H),

7.37 – 7.31 (m, 2H), 7.29 – 7.23 (m, 1H), 6.60 (d,  $J = 12.7$  Hz, 1H).  $^{13}\text{C}$  NMR (101 MHz,  $\text{CDCl}_3$ )  $\delta$  163.8, 136.6, 134.3, 133.8, 130.2, 129.0, 128.9, 128.7, 127.6, 126.4, 116.0.

**3,3a,6,6a-tetrahydro-2H-cyclopenta[b]furan-2-one (2ad)**

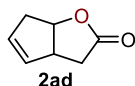

$^1\text{H}$  NMR (400 MHz, Chloroform- $d$ )  $\delta$  5.79 (dd,  $J = 5.6, 2.5$  Hz, 1H), 5.61 – 5.56 (m, 1H), 5.13 (td,  $J = 5.1, 4.1, 2.5$  Hz, 1H), 3.51 (m,  $J = 7.8, 5.9, 2.0$  Hz, 1H), 2.77 (dd,  $J = 18.0, 9.6$  Hz, 1H), 2.71 (q,  $J = 2.2$  Hz, 2H), 2.45 (dd,  $J = 18.0, 1.8$  Hz, 1H).  $^{13}\text{C}$  NMR (101 MHz,  $\text{CDCl}_3$ )  $\delta$  176.9, 131.4, 129.9, 83.2, 45.72, 39.68, 33.43.

**4-((R)-2-((3S,5R,7S)-5,7-dimethyl-2-oxooxepan-3-yl)-2-hydroxyethyl)piperidine-2,6-dione (2ae)**

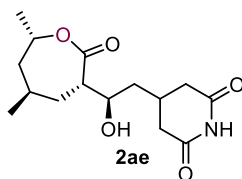

$^1\text{H}$  NMR (400 MHz, Chloroform- $d$ )  $\delta$  8.73 (s, 1H), 4.66 – 4.52 (m, 1H), 4.10 (d,  $J = 8.5$  Hz, 1H), 3.41 (s, 1H), 2.87 – 2.74 (m, 2H), 2.71 (d,  $J = 4.5$  Hz, 1H), 2.45 (dd,  $J = 9.4, 4.8$  Hz, 1H), 2.31 (m,  $J = 17.0, 10.6$  Hz, 2H), 1.93 – 1.72 (m, 3H), 1.66 (m,  $J = 15.7, 10.8, 5.1$  Hz, 1H), 1.47 (dd,  $J = 14.5, 7.6$  Hz, 2H), 1.32 (d,  $J = 6.1$  Hz, 3H), 1.26 – 1.18 (m, 1H), 1.00 (d,  $J = 6.5$  Hz, 3H).  $^{13}\text{C}$  NMR (101 MHz,  $\text{CDCl}_3$ )  $\delta$  177.2, 172.8, 172.7, 72.6, 67.8, 44.2, 42.2, 38.4, 37.9, 37.2, 28.4, 28.1, 27.4, 22.0, 20.4. HRMS (ESI),  $m/z$  calcd for  $\text{C}_{15}\text{H}_{24}\text{NO}_5$   $[\text{M} + \text{H}]^+$ : 298.1649; found: 298.1647.

**(2S,4aS,4bS,5'R,7aS,7bS,8S,9R,10aS,11aS,11bR,13aS)-4a,5',7a,8-tetramethyl-6-oxodocosahydrospiro[furo[2',3':4,5]cyclopenta[1,2-b]naphtho[2,1-d]oxepine-9,2'-pyran]-2-yl acetate (2af)**

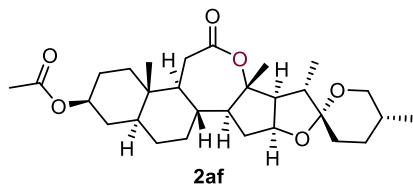

$^1\text{H}$  NMR (400 MHz, Chloroform-*d*)  $\delta$  4.67 (m,  $J = 10.5, 4.6$  Hz, 1H), 4.37 (q,  $J = 7.9$  Hz, 1H), 3.47 (d,  $J = 9.1$  Hz, 1H), 3.31 (t,  $J = 10.9$  Hz, 1H), 2.73 (d,  $J = 13.7$  Hz, 1H), 2.60 – 2.40 (m, 2H), 2.31 (m,  $J = 13.5, 7.1$  Hz, 1H), 2.01 (s, 4H), 1.95 – 1.80 (m, 4H), 1.80 – 1.65 (m, 4H), 1.62 – 1.54 (m, 2H), 1.47 (d,  $J = 11.4$  Hz, 1H), 1.44 (s, 3H), 1.39 – 1.29 (m, 4H), 1.28 – 1.18 (m, 3H), 1.12 (t,  $J = 10.9$  Hz, 2H), 1.04 (d,  $J = 7.0$  Hz, 3H), 0.78 (d,  $J = 7.5$  Hz, 6H).  $^{13}\text{C}$  NMR (101 MHz,  $\text{CDCl}_3$ )  $\delta$  174.8, 170.7, 108.9, 86.4, 75.7, 73.1, 67.1, 63.1, 56.8, 50.3, 43.6, 42.7, 38.3, 36.8, 36.6, 34.5, 34.0, 32.2, 31.5, 30.2, 28.8, 28.2, 27.4, 21.5, 18.7, 17.2, 14.1, 11.6. HRMS (ESI),  $m/z$  calcd for  $\text{C}_{29}\text{H}_{45}\text{O}_6$   $[\text{M} + \text{H}]^+$ : 489.3211; found: 489.3208.

**(2-methoxyphenoxy)methyl 3,4-dimethoxybenzoate (2ag)**

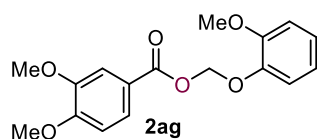

$^1\text{H}$  NMR (400 MHz, Chloroform-*d*)  $\delta$  7.71 (dd,  $J = 8.5, 2.0$  Hz, 1H), 7.55 (d,  $J = 2.0$  Hz, 1H), 7.15 (dd,  $J = 7.9, 1.6$  Hz, 1H), 7.06 (td,  $J = 7.8, 1.6$  Hz, 1H), 6.01 (s, 2H), 3.94 (s, 3H), 3.91 (s, 3H), 3.85 (s, 3H).  $^{13}\text{C}$  NMR (101 MHz,  $\text{CDCl}_3$ )  $\delta$  165.4, 153.5, 150.5, 148.8, 146.2, 124.2, 124.2, 122.1, 120.99, 118.0, 112.4, 112.3, 110.4, 87.7, 56.2, 56.0.

**3,4-dimethoxyphenyl 2-(2-methoxyphenoxy)acetate (2ag')**

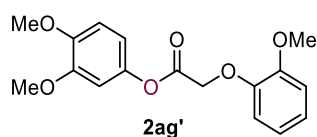

$^1\text{H}$  NMR (400 MHz, Chloroform-*d*)  $\delta$  7.04 – 6.86 (m, 4H), 6.81 (d,  $J = 8.3$  Hz, 1H), 6.68 – 6.61 (m, 2H), 4.90 (s, 2H), 3.88 (s, 3H), 3.84 (s, 3H), 3.82 (s, 3H).  $^{13}\text{C}$  NMR (101 MHz,  $\text{CDCl}_3$ )  $\delta$  168.1, 149.8, 149.4, 147.1, 147.0, 143.8, 123.0, 120.8, 115.1, 112.6, 112.3, 111.1, 105.4, 66.7, 56.2, 56.0, 55.9.

**3,4-dimethoxyphenyl 3-hydroxy-2-(2-methoxyphenoxy)propanoate (2ah)**

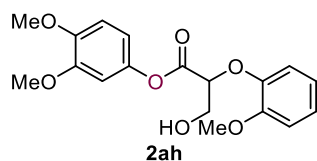

$^1\text{H}$  NMR (400 MHz, Chloroform-*d*)  $\delta$  7.13 – 7.01 (m, 2H), 6.91 (m,  $J = 15.4, 7.9, 1.5$  Hz, 2H), 6.81 (d,  $J = 8.4$  Hz, 1H), 6.67 – 6.59 (m, 2H), 4.89 (t,  $J = 4.4$  Hz, 1H), 4.18 (d,  $J = 4.4$  Hz, 2H), 3.87 (s, 3H), 3.84 (s, 3H), 3.82 (s, 3H).  $^{13}\text{C}$  NMR (101 MHz,  $\text{CDCl}_3$ )  $\delta$  168.7, 150.6, 149.4, 147.1, 146.8, 143.9, 124.1, 121.2, 118.8, 112.7, 112.4, 111.1, 105.5, 80.8, 63.3, 56.2, 56.1, 55.9.

**2-hydroxy-1-(2-methoxyphenoxy)ethyl 3,4-dimethoxybenzoate (2ah')**

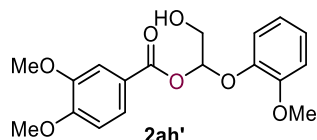

$^1\text{H}$  NMR (400 MHz, Chloroform-*d*)  $\delta$  7.73 (dd,  $J = 8.4, 2.0$  Hz, 1H), 7.53 (d,  $J = 2.0$  Hz, 1H), 7.14 – 7.03 (m, 2H), 6.96 – 6.82 (m, 3H), 6.54 (dd,  $J = 6.3, 3.8$  Hz, 1H), 4.02 (dd,  $J = 11.8, 6.3$  Hz, 1H), 3.95 (d,  $J = 4.0$  Hz, 1H), 3.93 (s, 3H), 3.91 (s, 3H), 3.85 (s, 3H).  $^{13}\text{C}$  NMR (101 MHz,  $\text{CDCl}_3$ )  $\delta$  165.1, 153.6, 151.0, 148.8, 145.3, 125.1, 124.3, 121.7, 121.3, 120.6, 112.3, 112.2, 110.4, 97.7, 63.4, 56.2, 56.2, 55.9.

**phenyl acetate (2ai)**

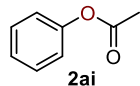

$^1\text{H}$  NMR (400 MHz, Chloroform-*d*)  $\delta$  7.42 – 7.34 (m, 2H), 7.24 (m,  $J = 8.6, 7.1, 1.4$  Hz, 1H), 7.13 – 7.06 (m, 2H), 2.30 (s, 3H).  $^{13}\text{C}$  NMR (101 MHz,  $\text{CDCl}_3$ )  $\delta$  169.6, 150.8, 129.5, 126.0, 121.7, 21.2.

**phenyl propionate (2aj)**

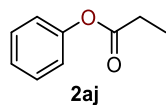

$^1\text{H}$  NMR (400 MHz, Chloroform-*d*)  $\delta$  7.42 (t,  $J = 7.9$  Hz, 2H), 7.26 (td,  $J = 7.3, 1.2$  Hz, 1H), 7.15 – 7.09 (m, 2H), 2.64 (q,  $J = 7.5$  Hz, 2H), 1.31 (t,  $J = 7.5$  Hz, 3H).  $^{13}\text{C}$  NMR (101 MHz,  $\text{CDCl}_3$ )  $\delta$  173.1, 150.9, 129.5, 125.8, 121.7, 27.9, 9.2.

**ethyl benzoate (2aj')**

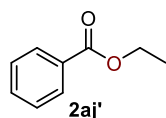

$^1\text{H}$  NMR (400 MHz, Chloroform-*d*)  $\delta$  8.12 – 8.04 (m, 2H), 7.62 – 7.57 (m, 1H), 7.48 (dd,  $J = 8.4, 7.0$  Hz, 2H), 4.43 (q,  $J = 7.1$  Hz, 2H), 1.43 (d,  $J = 7.1$  Hz, 3H).

**isopropyl benzoate (2ak)**

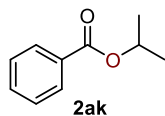

$^1\text{H}$  NMR (400 MHz, Chloroform-*d*)  $\delta$  8.08 – 8.01 (m, 2H), 7.55 – 7.51 (m, 1H), 7.45 – 7.40 (m, 2H), 5.26 (m,  $J = 6.2$  Hz, 1H), 1.37 (d,  $J = 6.3$  Hz, 6H).  $^{13}\text{C}$  NMR (101 MHz,  $\text{CDCl}_3$ )  $\delta$  166.2, 132.8, 131.0, 129.6, 128.4, 68.4, 22.0.

**phenyl isobutyrate (2ak')**

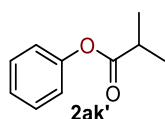

$^1\text{H}$  NMR (400 MHz, Chloroform-*d*)  $\delta$  7.40 – 7.33 (m, 2H), 7.24 – 7.18 (m, 1H), 7.07 (d,  $J = 7.4$  Hz, 2H), 2.80 (m,  $J = 7.0$  Hz, 1H), 1.32 (d,  $J = 7.0$  Hz, 6H).  $^{13}\text{C}$  NMR (101 MHz,  $\text{CDCl}_3$ )  $\delta$  175.8, 151.0, 129.5, 125.8, 121.6, 34.3, 19.0.

**tert-butyl benzoate (2al)**

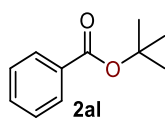

$^1\text{H}$  NMR (400 MHz, Chloroform-*d*)  $\delta$  7.99 (dd,  $J = 7.8, 2.3$  Hz, 2H), 7.56 – 7.48 (m, 1H), 7.41 (td,  $J = 7.8, 2.1$  Hz, 2H), 1.60 (s, 9H).  $^{13}\text{C}$  NMR (101 MHz,  $\text{CDCl}_3$ )  $\delta$  165.9, 132.6, 132.2, 129.5, 128.3, 81.1, 28.3.

### 13. Crystal data and structure refinement

**2,2'-Diperoxyphenic Acid:** The crystal structure of compound **2,2'-Diperoxyphenic Acid** has been deposited at the Cambridge Crystallographic Data Centre (CCDC 2089219).

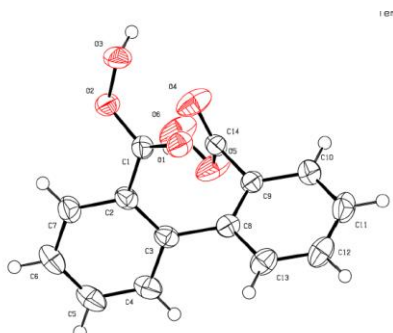

## X-ray crystal structure of **2,2'-Diperoxyphenic Acid**

### Crystal data and structure refinement for **2,2'-Diperoxyphenic Acid**.

|                                    |                                                               |
|------------------------------------|---------------------------------------------------------------|
| Identification code                | GSY2021329-S (2,2'-Diperoxyphenic Acid)                       |
| Empirical formula                  | C <sub>14</sub> H <sub>10</sub> O <sub>6</sub>                |
| Formula weight                     | 274.22                                                        |
| Temperature                        | 230 K                                                         |
| Wavelength                         | 1.54184 Å                                                     |
| Crystal system                     | monoclinic                                                    |
| Space group                        | P2 <sub>1</sub> /c                                            |
| a/Å                                | 13.5207(4)                                                    |
| b/Å                                | 11.7590(3)                                                    |
| c/Å                                | 7.7352(2)                                                     |
| α/°                                | 90                                                            |
| β/°                                | 97.600(2)                                                     |
| γ/°                                | 90                                                            |
| Volume/Å <sup>3</sup>              | 1219.02(6)                                                    |
| Z                                  | 4                                                             |
| ρ <sub>calc</sub> /cm <sup>3</sup> | 1.494                                                         |
| μ/mm <sup>-1</sup>                 | 1.014                                                         |
| F(000)                             | 568.0                                                         |
| Crystal size/mm <sup>3</sup>       | 0.3 × 0.3 × 0.2                                               |
| Radiation                          | CuKα (λ = 1.54184)                                            |
| 2θ range for data collection/°     | 6.596 to 143.558                                              |
| Index ranges                       | -16 ≤ h ≤ 16, -10 ≤ k ≤ 14, -9 ≤ l ≤ 9                        |
| Reflections collected              | 6127                                                          |
| Independent reflections            | 2317 [R <sub>int</sub> = 0.0352, R <sub>sigma</sub> = 0.0369] |
| Data/restraints/parameters         | 2317/0/183                                                    |
| Goodness-of-fit on F <sup>2</sup>  | 1.052                                                         |
| Final R indexes [I >= 2σ (I)]      | R <sub>1</sub> = 0.0522, wR <sub>2</sub> = 0.1475             |
| Final R indexes [all data]         | R <sub>1</sub> = 0.0556, wR <sub>2</sub> = 0.1525             |

Largest diff. peak/hole / e Å<sup>-3</sup>

0.320/ -0.368

## 14. DFT Computations Methods:

All the DFT computations were performed with the Gaussian16 program suite.<sup>[3]</sup> Geometries were optimized with dispersion corrections [DFT-D3(BJ)]<sup>[4]</sup> in conjunction with the B3LYP functional combining a 6-31G(d) basis set.<sup>[5]</sup> Vibrational frequencies were computed for each optimized structure to verify the stationary structures as minima or saddle points. Solvent effects were included by single-point energy computations with the SMD model at the level of B3LYP/6-311G(d,p) for the optimized geometry.<sup>[6]</sup> All energies discussed are Gibbs free relative energies at 298.15 K and 1 atm in kcal mol<sup>-1</sup>. Effects of zero-point vibrational energy (ZPVE) corrections are included.

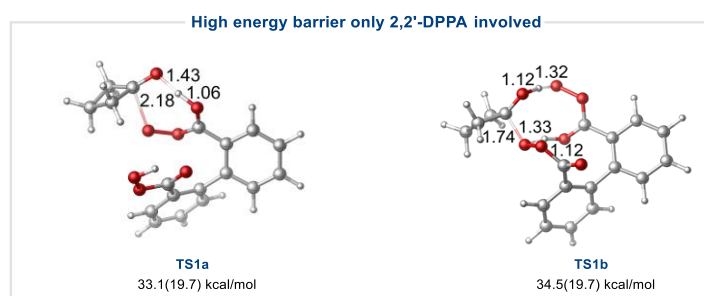

**Figure S5.** Computed geometries and relative free energies of the transition states for the addition step in pathway a and b without external acid.

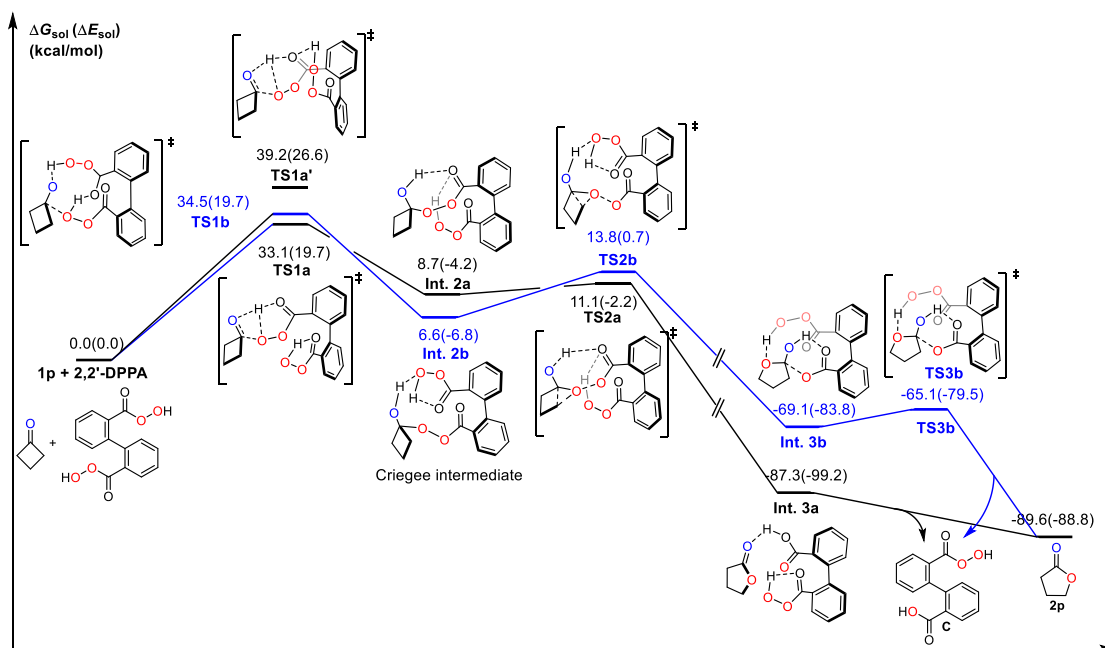

**Figure S6.** Potential energy profiles of the reaction of **1q** and 2,2'-DPPA.

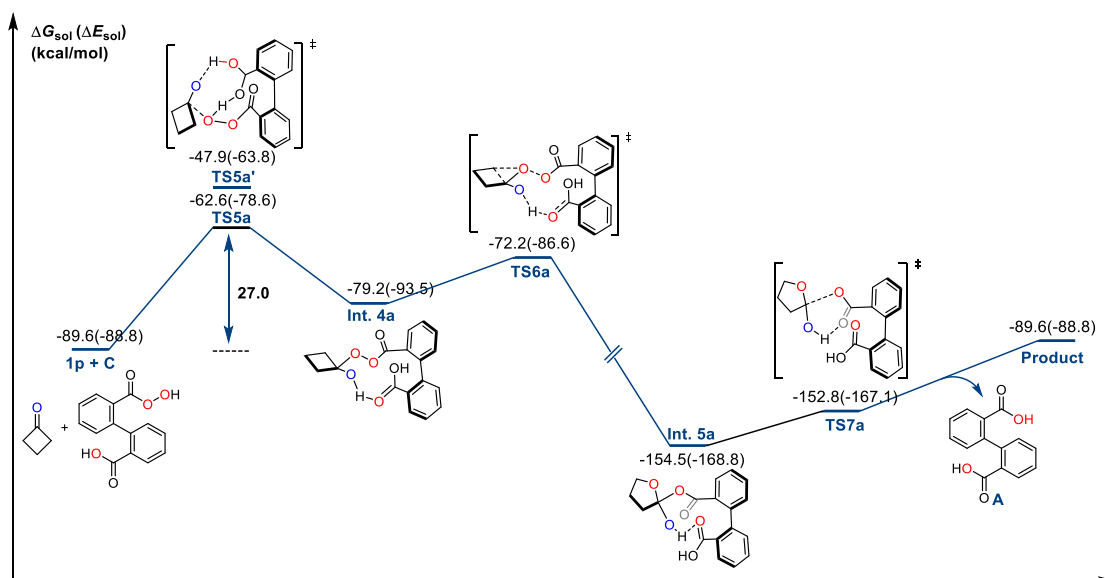

**Figure S7.** Potential energy profiles of the reaction of **1p** and monoperoacid.

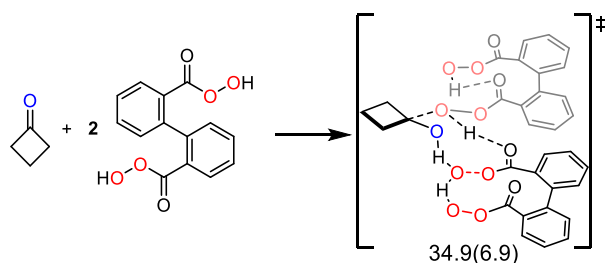

**Figure S8.** Potential energy profiles of two molecular of 2,2'-DPPA in presence.

Energies

| Geometries | E (SCF Done) | E(correction) | G(correction) |
|------------|--------------|---------------|---------------|
|------------|--------------|---------------|---------------|



---

|                    |              |              |              |
|--------------------|--------------|--------------|--------------|
| <b>1p</b>          | -231.241627  | -231.150355  | -231.179533  |
| <b>TS1a</b>        | -1221.969253 | -1221.659764 | -1221.711385 |
| <b>TS1apri</b>     | -1221.950693 | -1221.643180 | -1221.695964 |
| <b>TS1b</b>        | -1221.965222 | -1221.658829 | -1221.708072 |
| <b>Int. 2a</b>     | -1222.013477 | -1221.700134 | -1221.752441 |
| <b>Int. 2b</b>     | -1222.018470 | -1221.704761 | -1221.756280 |
| <b>TS2a</b>        | -1222.005916 | -1221.694822 | -1221.746518 |
| <b>TS2b</b>        | -1221.990969 | -1221.680212 | -1221.732193 |
| <b>Int. 3a</b>     | -1222.166980 | -1221.851187 | -1221.905011 |
| <b>Int. 3b</b>     | -1222.146474 | -1221.828560 | -1221.878063 |
| <b>TS3b</b>        | -1222.131000 | -1221.817990 | -1221.867881 |
| <b>1q</b>          | -306.507981  | -306.408828  | -306.437442  |
| <b>C</b>           | -915.629556  | -915.414921  | -915.460344  |
| <b>TS4a</b>        | -1146.858774 | -1146.555288 | -1146.603160 |
| <b>TS4apri</b>     | -1146.846738 | -1146.538918 | -1146.587048 |
| <b>Int. 4a</b>     | -1146.889565 | -1146.579359 | -1146.630025 |
| <b>TS5a</b>        | -1146.865194 | -1146.557458 | -1146.607962 |
| <b>Int. 5a</b>     | -1147.014932 | -1146.701028 | -1146.751572 |
| <b>TS6a</b>        | -1222.131000 | -1221.817990 | -1221.867881 |
| <b>A</b>           | -840.502263  | -840.290229  | -840.332324  |
| <b>TSI</b>         | -2062.520671 | -2061.999430 | -2062.071981 |
| <b>B</b>           | -2062.546360 | -2062.019115 | -2062.092290 |
| <b>TSII</b>        | -2062.531228 | -2062.006143 | -2062.077243 |
| <b>TSIII</b>       | -1987.393152 | -1986.874460 | -1986.946112 |
| <b>D</b>           | -1987.425815 | -1986.901341 | -1986.973010 |
| <b>TSIV</b>        | -1987.400197 | -1986.878799 | -1986.949557 |
| <b>Me-TS2c-ph</b>  | -2216.205802 | -2215.634857 | -2215.707859 |
| <b>Me-TS2c-R</b>   | -2216.194470 | -2215.624434 | -2215.700234 |
| <b>Me-TS4c-ph</b>  | -2141.072888 | -2140.505846 | -2140.578743 |
| <b>Me-TS4c-R</b>   | -2141.067784 | -2140.501268 | -2140.575131 |
| <b>tBu-TS2c-ph</b> | -2334.159462 | -2333.503643 | -2333.583287 |
| <b>h</b>           |              |              |              |
| <b>tBu-TS2c-R</b>  | -2334.166464 | -2333.511209 | -2333.592880 |
| <b>tBu-TS4c-ph</b> | -2259.038185 | -2258.385682 | -2258.462038 |
| <b>h</b>           |              |              |              |
| <b>tBu-TS4c-R</b>  | -2259.042758 | -2258.390646 | -2258.470793 |

---

Cartesian coordinates (Å)

**1p**

|   |           |           |           |
|---|-----------|-----------|-----------|
| C | -0.040686 | -0.384021 | -1.110488 |
| C | -0.040686 | -1.478826 | -0.000000 |
| C | -0.040686 | -0.384021 | 1.110488  |
| C | 0.025815  | 0.679126  | 0.000000  |
| H | -0.955260 | -0.321213 | -1.711061 |
| H | 0.816533  | -0.375344 | -1.792368 |
| H | 0.854514  | -2.104990 | -0.000000 |
| H | -0.920046 | -2.126599 | 0.000000  |
| H | -0.955260 | -0.321213 | 1.711061  |
| H | 0.816533  | -0.375344 | 1.792368  |
| O | 0.115055  | 1.878894  | -0.000000 |

**TS1a**

|   |           |           |           |
|---|-----------|-----------|-----------|
| O | -0.515595 | -0.007850 | -2.061062 |
| O | 0.911134  | -1.735408 | -2.009640 |
| O | 1.531474  | -1.020728 | -3.093427 |
| H | 0.950663  | -0.215675 | -3.114964 |
| O | 0.534947  | 2.417062  | -0.375965 |
| O | 0.426692  | 0.558002  | 0.934624  |
| O | 1.663387  | 0.068031  | 0.362216  |
| H | 1.765339  | 2.486719  | 0.149225  |
| C | -0.165022 | -1.054450 | -1.539065 |
| C | -0.795322 | -1.731515 | -0.383464 |
| C | -1.764114 | -1.077424 | 0.415554  |
| C | -2.301481 | -1.788493 | 1.497646  |
| H | -3.031027 | -1.292421 | 2.129565  |
| C | -1.907438 | -3.091443 | 1.793343  |
| H | -2.343410 | -3.604421 | 2.645610  |
| C | -0.955797 | -3.725852 | 0.998895  |
| H | -0.639807 | -4.741195 | 1.216551  |
| C | -0.405577 | -3.043149 | -0.079880 |
| H | 0.337130  | -3.526233 | -0.702846 |
| C | -2.323076 | 0.295184  | 0.201804  |
| C | -1.585672 | 1.502345  | 0.172538  |
| C | -2.235415 | 2.731653  | 0.010084  |
| H | -1.631171 | 3.631306  | -0.026401 |
| C | -3.619185 | 2.797426  | -0.104885 |
| H | -4.112468 | 3.757036  | -0.222732 |
| C | -4.358886 | 1.616463  | -0.077869 |

|   |           |           |           |
|---|-----------|-----------|-----------|
| H | -5.439889 | 1.645134  | -0.179644 |
| C | -3.715249 | 0.388587  | 0.071368  |
| H | -4.298543 | -0.526537 | 0.069318  |
| C | -0.112898 | 1.532114  | 0.212710  |
| C | 3.972383  | 0.581290  | -0.371471 |
| C | 4.481038  | -0.501708 | 0.627553  |
| C | 3.870767  | 0.313277  | 1.807211  |
| C | 3.114415  | 1.139183  | 0.774104  |
| H | 3.444535  | 0.248116  | -1.268527 |
| H | 4.745053  | 1.309224  | -0.644604 |
| H | 5.560920  | -0.663344 | 0.659449  |
| H | 3.973658  | -1.457543 | 0.482476  |
| H | 3.261672  | -0.213332 | 2.544367  |
| H | 4.608390  | 0.938506  | 2.323745  |
| O | 2.658978  | 2.336356  | 0.966048  |

**TS1b**

|   |           |           |           |
|---|-----------|-----------|-----------|
| O | 2.824337  | -1.734882 | 0.800958  |
| O | 1.870988  | 0.623235  | 0.313998  |
| H | 2.232441  | -2.265228 | 0.088532  |
| C | -0.146155 | 0.723149  | 1.604536  |
| O | 1.187914  | 0.316836  | 1.561115  |
| O | -0.774765 | 0.297399  | 2.535425  |
| O | 1.468344  | -2.704866 | -1.046613 |
| O | 0.207797  | -0.396412 | -1.273692 |
| H | 1.240400  | 0.203541  | -0.397779 |
| C | -0.644433 | 1.646462  | 0.550416  |
| C | -0.033522 | 2.892619  | 0.393135  |
| C | -1.766139 | 1.289073  | -0.221585 |
| C | -0.552012 | 3.818977  | -0.508968 |
| H | 0.840560  | 3.136021  | 0.988344  |
| C | -2.267915 | 2.231807  | -1.124746 |
| C | -1.673109 | 3.485296  | -1.266826 |
| H | -0.082162 | 4.791507  | -0.618420 |
| H | -3.122819 | 1.962961  | -1.737294 |
| H | -2.081931 | 4.196391  | -1.978703 |
| C | 3.307475  | -0.705216 | 0.246177  |
| C | 4.405160  | 0.207485  | 0.755410  |
| C | 3.644080  | -0.420556 | -1.212383 |
| C | 4.554263  | 0.741412  | -0.705261 |
| H | 5.257000  | -0.396581 | 1.087238  |
| H | 4.135169  | 0.909171  | 1.545919  |

|   |           |           |           |
|---|-----------|-----------|-----------|
| H | 4.208655  | -1.270454 | -1.612069 |
| H | 2.818281  | -0.217649 | -1.895787 |
| H | 5.570074  | 0.760194  | -1.103515 |
| H | 4.093150  | 1.721667  | -0.837925 |
| C | -0.404496 | -1.364853 | -0.789273 |
| O | 0.118316  | -2.549837 | -0.573256 |
| C | -1.827896 | -1.280572 | -0.357279 |
| C | -2.569014 | -2.463736 | -0.221332 |
| C | -2.447651 | -0.032944 | -0.108141 |
| C | -3.908939 | -2.431058 | 0.147861  |
| H | -2.077888 | -3.408615 | -0.420796 |
| C | -3.799397 | -0.023809 | 0.258494  |
| C | -4.527188 | -1.204248 | 0.386631  |
| H | -4.466951 | -3.357327 | 0.244401  |
| H | -4.273343 | 0.930679  | 0.465386  |
| H | -5.572762 | -1.163797 | 0.677794  |

**Int. 2a**

|   |           |           |           |
|---|-----------|-----------|-----------|
| O | 2.027711  | -0.109025 | 2.245426  |
| O | 0.151160  | -1.416221 | 2.132670  |
| O | -0.234382 | -0.799601 | 3.377465  |
| H | -0.595456 | 0.045396  | 3.029764  |
| O | -0.980620 | 1.314628  | 1.372416  |
| O | -0.861745 | 0.137850  | -0.581526 |
| O | -1.968406 | -0.699337 | -0.122143 |
| H | -2.842891 | 1.030823  | 1.333216  |
| C | 1.352942  | -0.931190 | 1.682956  |
| C | 1.611415  | -1.530154 | 0.336800  |
| C | 1.923933  | -0.687683 | -0.750045 |
| C | 2.210213  | -1.279032 | -1.985656 |
| H | 2.433725  | -0.638599 | -2.833530 |
| C | 2.179134  | -2.663476 | -2.146659 |
| H | 2.401710  | -3.097107 | -3.117199 |
| C | 1.847925  | -3.485342 | -1.070443 |
| H | 1.814074  | -4.563596 | -1.192117 |
| C | 1.555128  | -2.915315 | 0.166780  |
| H | 1.292819  | -3.541275 | 1.012998  |
| C | 1.961861  | 0.794831  | -0.629334 |
| C | 0.910915  | 1.564098  | -0.081819 |
| C | 1.053521  | 2.945895  | 0.090094  |
| H | 0.238513  | 3.501323  | 0.541859  |
| C | 2.212486  | 3.593265  | -0.323865 |

|   |           |           |           |
|---|-----------|-----------|-----------|
| H | 2.310838  | 4.666703  | -0.196811 |
| C | 3.244409  | 2.849660  | -0.896361 |
| H | 4.158188  | 3.341211  | -1.217059 |
| C | 3.120158  | 1.468665  | -1.034876 |
| H | 3.946554  | 0.887709  | -1.431847 |
| C | -0.391123 | 0.991622  | 0.352226  |
| C | -4.343933 | -0.909090 | -0.782434 |
| C | -4.776149 | 0.276144  | -1.689792 |
| C | -3.396324 | 0.945871  | -1.438214 |
| C | -3.227242 | -0.001800 | -0.223978 |
| H | -3.926275 | -1.744155 | -1.349051 |
| H | -5.050892 | -1.272063 | -0.034234 |
| H | -5.595901 | 0.847087  | -1.247801 |
| H | -5.021106 | 0.037904  | -2.727612 |
| H | -2.676401 | 0.727283  | -2.229880 |
| H | -3.380951 | 2.013338  | -1.203516 |
| O | -3.608990 | 0.521230  | 1.002012  |

**Int. 2b**

|   |           |           |           |
|---|-----------|-----------|-----------|
| O | 2.914964  | -2.118896 | 0.543320  |
| O | 1.766281  | -0.112579 | 0.219238  |
| H | 2.275105  | -2.484990 | -0.101394 |
| C | -0.021896 | 0.512349  | 1.580482  |
| O | 1.138593  | -0.206009 | 1.555612  |
| O | -0.756760 | 0.333704  | 2.522045  |
| O | 0.939374  | -2.719274 | -1.488574 |
| O | -0.312125 | -0.612354 | -1.993717 |
| H | 0.955657  | -1.890604 | -2.042240 |
| C | -0.283222 | 1.499675  | 0.486490  |
| C | 0.612297  | 2.550671  | 0.269830  |
| C | -1.495273 | 1.445815  | -0.222940 |
| C | 0.296039  | 3.567647  | -0.626789 |
| H | 1.548569  | 2.573179  | 0.817523  |
| C | -1.799053 | 2.471410  | -1.122932 |
| C | -0.913820 | 3.529067  | -1.321335 |
| H | 0.991034  | 4.387271  | -0.782550 |
| H | -2.727549 | 2.420886  | -1.683539 |
| H | -1.163515 | 4.316494  | -2.026370 |
| C | 3.030934  | -0.773344 | 0.296314  |
| C | 4.040476  | -0.015967 | 1.175209  |
| C | 3.753361  | -0.238099 | -0.977896 |
| C | 4.456874  | 0.810035  | -0.073860 |

|   |           |           |           |
|---|-----------|-----------|-----------|
| H | 4.826971  | -0.695658 | 1.511243  |
| H | 3.620966  | 0.511860  | 2.034148  |
| H | 4.437698  | -1.004918 | -1.350466 |
| H | 3.116801  | 0.124404  | -1.790137 |
| H | 5.528290  | 0.952562  | -0.232648 |
| H | 3.958633  | 1.782051  | -0.115907 |
| C | -0.817576 | -1.280124 | -1.112005 |
| O | -0.240282 | -2.448159 | -0.698309 |
| C | -2.074352 | -1.014748 | -0.376928 |
| C | -2.939120 | -2.081305 | -0.097189 |
| C | -2.432921 | 0.306716  | -0.036506 |
| C | -4.177545 | -1.841301 | 0.489773  |
| H | -2.642892 | -3.090148 | -0.362219 |
| C | -3.683772 | 0.525534  | 0.545244  |
| C | -4.552356 | -0.534354 | 0.801818  |
| H | -4.847308 | -2.669649 | 0.697972  |
| H | -3.956459 | 1.537424  | 0.827466  |
| H | -5.516812 | -0.339703 | 1.261516  |

**TS2a**

|   |           |           |           |
|---|-----------|-----------|-----------|
| C | 2.953701  | 0.801364  | -0.317331 |
| O | 2.753233  | 1.759538  | 0.564528  |
| C | 3.663942  | -0.464122 | 0.164966  |
| H | 4.149332  | -0.271910 | 1.122481  |
| H | 2.956592  | -1.288431 | 0.275319  |
| O | 2.250062  | 0.782698  | -1.408198 |
| C | -0.129745 | 1.523784  | -0.446817 |
| O | 0.420678  | 0.431943  | -0.845480 |
| O | 0.464572  | 2.588727  | -0.166585 |
| H | 1.929055  | 2.284585  | 0.235461  |
| C | 4.654177  | -0.566651 | -1.017173 |
| H | 5.686184  | -0.790789 | -0.728917 |
| H | 4.329939  | -1.284213 | -1.772919 |
| C | 4.451412  | 0.854524  | -1.491045 |
| H | 4.298073  | 1.092569  | -2.539344 |
| H | 4.951194  | 1.643979  | -0.929956 |
| C | -1.631630 | 1.486148  | -0.289483 |
| C | -2.267492 | 2.726474  | -0.168567 |
| C | -2.394964 | 0.300745  | -0.229757 |
| C | -3.646291 | 2.820717  | -0.007288 |
| H | -1.647449 | 3.614383  | -0.202172 |
| C | -3.782709 | 0.416262  | -0.055740 |

|   |           |           |           |
|---|-----------|-----------|-----------|
| C | -4.408013 | 1.656104  | 0.053046  |
| H | -4.118523 | 3.795087  | 0.077774  |
| H | -4.374121 | -0.491681 | 0.012993  |
| H | -5.484487 | 1.706742  | 0.190241  |
| C | -1.873152 | -1.091803 | -0.372849 |
| C | -2.441464 | -1.880922 | -1.381347 |
| C | -0.909048 | -1.698415 | 0.463930  |
| C | -2.082266 | -3.215424 | -1.563397 |
| H | -3.170407 | -1.423907 | -2.042796 |
| C | -0.552551 | -3.040213 | 0.280548  |
| C | -1.137839 | -3.803218 | -0.725355 |
| H | -2.543334 | -3.792109 | -2.360164 |
| H | 0.182734  | -3.484482 | 0.941501  |
| H | -0.856598 | -4.844202 | -0.851282 |
| C | -0.238110 | -0.926078 | 1.532219  |
| O | -0.656607 | 0.033422  | 2.151511  |
| O | 1.014842  | -1.418075 | 1.772164  |
| O | 1.669405  | -0.669355 | 2.816085  |
| H | 1.014591  | 0.067567  | 2.928222  |

### TS2b

|   |           |           |           |
|---|-----------|-----------|-----------|
| O | 3.041914  | -2.193611 | 0.420251  |
| O | 1.971046  | -0.182238 | 0.137433  |
| H | 2.183928  | -2.516092 | 0.051675  |
| C | -0.081420 | 0.358771  | 1.652328  |
| O | 1.071009  | -0.269360 | 1.751385  |
| O | -0.984320 | 0.122740  | 2.444184  |
| O | 0.820098  | -2.875595 | -1.138127 |
| O | -0.246345 | -0.747663 | -1.869956 |
| H | 0.893597  | -2.105898 | -1.770417 |
| C | -0.238021 | 1.416637  | 0.590093  |
| C | 0.726030  | 2.421133  | 0.467163  |
| C | -1.403064 | 1.471770  | -0.196377 |
| C | 0.537151  | 3.485975  | -0.410664 |
| H | 1.617921  | 2.365416  | 1.082188  |
| C | -1.580498 | 2.541022  | -1.080783 |
| C | -0.620281 | 3.545363  | -1.187919 |
| H | 1.287182  | 4.268403  | -0.485527 |
| H | -2.472662 | 2.569205  | -1.699634 |
| H | -0.773551 | 4.368165  | -1.880315 |
| C | 3.077564  | -0.862075 | 0.309055  |
| C | 4.264177  | -0.131412 | 0.931330  |

|   |           |           |           |
|---|-----------|-----------|-----------|
| C | 3.572061  | 0.015739  | -1.207024 |
| C | 4.401938  | 0.866380  | -0.245296 |
| H | 5.119916  | -0.804619 | 1.013935  |
| H | 4.023202  | 0.285316  | 1.913283  |
| H | 4.118714  | -0.776151 | -1.726774 |
| H | 2.798225  | 0.466270  | -1.822484 |
| H | 5.427379  | 1.058950  | -0.572386 |
| H | 3.908601  | 1.818292  | -0.040491 |
| C | -0.866174 | -1.318298 | -0.991330 |
| O | -0.397650 | -2.489882 | -0.458399 |
| C | -2.162013 | -0.938865 | -0.393455 |
| C | -3.132407 | -1.929729 | -0.197077 |
| C | -2.441252 | 0.412195  | -0.101196 |
| C | -4.402930 | -1.582589 | 0.251170  |
| H | -2.891415 | -2.963482 | -0.419349 |
| C | -3.726440 | 0.738125  | 0.338675  |
| C | -4.700630 | -0.244346 | 0.508602  |
| H | -5.155744 | -2.351311 | 0.394300  |
| H | -3.944454 | 1.772679  | 0.583868  |
| H | -5.689599 | 0.034939  | 0.860176  |

### Int. 3a

|   |           |           |           |
|---|-----------|-----------|-----------|
| C | -3.213009 | -1.457371 | -0.369318 |
| O | -2.892937 | -2.596089 | -0.083234 |
| C | -3.591305 | -0.328727 | 0.567427  |
| H | -4.635355 | -0.477076 | 0.873518  |
| H | -2.968036 | -0.347813 | 1.461963  |
| O | -3.288060 | -1.047063 | -1.648719 |
| C | 0.195839  | -1.557729 | -0.424750 |
| O | -0.578968 | -0.610236 | -0.428393 |
| O | -0.211428 | -2.825490 | -0.542903 |
| H | -1.203742 | -2.837546 | -0.528484 |
| C | -3.409748 | 0.916415  | -0.306033 |
| H | -4.109488 | 1.722426  | -0.071647 |
| H | -2.391360 | 1.291943  | -0.198356 |
| C | -3.622659 | 0.359300  | -1.722303 |
| H | -2.969346 | 0.805737  | -2.473953 |
| H | -4.663260 | 0.435270  | -2.057449 |
| C | 1.674306  | -1.427565 | -0.280839 |
| C | 2.441893  | -2.592665 | -0.150243 |
| C | 2.313370  | -0.166696 | -0.264627 |
| C | 3.823933  | -2.534417 | -0.001267 |



|   |           |           |           |
|---|-----------|-----------|-----------|
| H | 1.933894  | -3.548788 | -0.167059 |
| C | 3.706686  | -0.130133 | -0.126276 |
| C | 4.459023  | -1.294930 | 0.010856  |
| H | 4.397736  | -3.450142 | 0.104222  |
| H | 4.200704  | 0.836494  | -0.111978 |
| H | 5.537082  | -1.229449 | 0.126987  |
| C | 1.642720  | 1.155552  | -0.459369 |
| C | 2.002422  | 1.895995  | -1.590617 |
| C | 0.729897  | 1.738261  | 0.444935  |
| C | 1.476515  | 3.165942  | -1.831618 |
| H | 2.698092  | 1.455409  | -2.297897 |
| C | 0.205756  | 3.012883  | 0.204162  |
| C | 0.577495  | 3.730457  | -0.930495 |
| H | 1.774035  | 3.710444  | -2.723131 |
| H | -0.489444 | 3.441327  | 0.917159  |
| H | 0.168727  | 4.721064  | -1.104190 |
| C | 0.299102  | 0.992571  | 1.646804  |
| O | 0.917570  | 0.148088  | 2.267610  |
| O | -0.955473 | 1.365181  | 2.032152  |
| O | -1.363635 | 0.635578  | 3.207546  |
| H | -0.570205 | 0.048079  | 3.319232  |

**Int. 3b**

|   |           |           |           |
|---|-----------|-----------|-----------|
| O | 2.662750  | -0.870559 | 2.166551  |
| O | 2.674457  | -1.162793 | -0.107600 |
| H | 1.711766  | -1.111978 | 2.217130  |
| C | 0.543018  | 0.571400  | 0.905049  |
| O | 1.858167  | 0.831543  | 0.752212  |
| O | 0.124412  | -0.422215 | 1.482233  |
| O | 0.952883  | -2.930485 | -1.343762 |
| O | -0.146869 | -0.578891 | -1.718449 |
| H | 1.562600  | -2.408495 | -0.769211 |
| C | -0.302345 | 1.626185  | 0.286170  |
| C | 0.273689  | 2.882455  | 0.052614  |
| C | -1.646744 | 1.387053  | -0.080924 |
| C | -0.454924 | 3.915293  | -0.526854 |
| H | 1.306112  | 3.040928  | 0.338707  |
| C | -2.354292 | 2.439484  | -0.680264 |
| C | -1.776773 | 3.687552  | -0.901174 |
| H | 0.009072  | 4.882984  | -0.691091 |
| H | -3.377114 | 2.259143  | -0.994611 |
| H | -2.360020 | 4.474857  | -1.369985 |

|   |           |           |           |
|---|-----------|-----------|-----------|
| C | 2.823878  | -0.260441 | 0.966715  |
| C | 4.187994  | 0.370540  | 0.748607  |
| C | 3.292252  | -0.591894 | -1.288538 |
| C | 4.232686  | 0.527109  | -0.780218 |
| H | 4.935127  | -0.339767 | 1.113109  |
| H | 4.291473  | 1.308497  | 1.296456  |
| H | 3.824369  | -1.408957 | -1.782165 |
| H | 2.502726  | -0.224121 | -1.947521 |
| H | 5.244695  | 0.425833  | -1.179419 |
| H | 3.849250  | 1.506984  | -1.075113 |
| C | -0.749390 | -1.371355 | -1.033230 |
| O | -0.300782 | -2.621324 | -0.707630 |
| C | -2.054923 | -1.153710 | -0.344211 |
| C | -2.909525 | -2.245016 | -0.150478 |
| C | -2.417346 | 0.124497  | 0.133723  |
| C | -4.125309 | -2.095953 | 0.511547  |
| H | -2.610777 | -3.216125 | -0.527139 |
| C | -3.638622 | 0.246353  | 0.811060  |
| C | -4.485192 | -0.844127 | 1.002831  |
| H | -4.778213 | -2.952711 | 0.647192  |
| H | -3.917670 | 1.218459  | 1.205192  |
| H | -5.422310 | -0.710287 | 1.535475  |

### TS3b

|   |           |           |           |
|---|-----------|-----------|-----------|
| O | 2.398099  | -1.032468 | 2.004850  |
| O | 2.787766  | -1.045396 | -0.219599 |
| H | 1.298813  | -0.907649 | 1.848524  |
| C | 0.550256  | 0.742969  | 0.850233  |
| O | 1.787322  | 1.042616  | 0.688184  |
| O | 0.163265  | -0.301754 | 1.456646  |
| O | 1.074442  | -2.811883 | -1.590743 |
| O | -0.116075 | -0.492002 | -1.737156 |
| H | 1.706272  | -2.300286 | -1.039156 |
| C | -0.439238 | 1.694339  | 0.264571  |
| C | 0.010746  | 2.997516  | 0.019587  |
| C | -1.761687 | 1.331963  | -0.072649 |
| C | -0.822478 | 3.959500  | -0.540672 |
| H | 1.033999  | 3.240876  | 0.280621  |
| C | -2.579510 | 2.313995  | -0.652932 |
| C | -2.126336 | 3.610440  | -0.884512 |
| H | -0.454432 | 4.966345  | -0.713866 |
| H | -3.588670 | 2.039300  | -0.942971 |

|   |           |           |           |
|---|-----------|-----------|-----------|
| H | -2.791452 | 4.340282  | -1.337302 |
| C | 2.923463  | -0.450831 | 0.990611  |
| C | 4.223534  | 0.307173  | 1.010509  |
| C | 3.512952  | -0.292107 | -1.233207 |
| C | 4.390344  | 0.721684  | -0.461944 |
| H | 5.001054  | -0.392675 | 1.339925  |
| H | 4.181075  | 1.139138  | 1.712322  |
| H | 4.088113  | -1.025814 | -1.802081 |
| H | 2.766432  | 0.175280  | -1.876105 |
| H | 5.431383  | 0.688888  | -0.790590 |
| H | 4.010186  | 1.733121  | -0.611366 |
| C | -0.659657 | -1.343492 | -1.075240 |
| O | -0.133679 | -2.589928 | -0.840689 |
| C | -1.951605 | -1.236551 | -0.338072 |
| C | -2.705582 | -2.397634 | -0.125619 |
| C | -2.407781 | 0.004443  | 0.159055  |
| C | -3.906482 | -2.356901 | 0.577193  |
| H | -2.340446 | -3.337832 | -0.520888 |
| C | -3.612941 | 0.017014  | 0.874940  |
| C | -4.355939 | -1.142584 | 1.088145  |
| H | -4.478695 | -3.267299 | 0.727322  |
| H | -3.961905 | 0.960720  | 1.282029  |
| H | -5.283214 | -1.091485 | 1.651655  |

**2p**

|   |           |           |           |
|---|-----------|-----------|-----------|
| C | -0.888603 | -0.001612 | -0.003731 |
| O | -2.087779 | -0.028213 | 0.073404  |
| C | 0.027734  | 1.207769  | -0.172373 |
| H | -0.006101 | 1.512877  | -1.226073 |
| H | -0.335660 | 2.044588  | 0.426867  |
| O | -0.126585 | -1.135099 | 0.044165  |
| C | 1.404071  | 0.668385  | 0.224410  |
| H | 2.237658  | 1.145465  | -0.297102 |
| H | 1.563067  | 0.785701  | 1.301484  |
| C | 1.268922  | -0.820476 | -0.130039 |
| H | 1.841664  | -1.486615 | 0.518371  |
| H | 1.541536  | -1.019915 | -1.173697 |

**C**

|   |           |           |          |
|---|-----------|-----------|----------|
| C | -1.152934 | -0.933433 | 1.552512 |
| O | -0.003033 | -0.877011 | 1.942181 |

|   |           |           |           |
|---|-----------|-----------|-----------|
| O | -2.047926 | -1.776514 | 2.132661  |
| H | -1.545802 | -2.241652 | 2.826713  |
| C | -1.746602 | -0.138142 | 0.447008  |
| C | -3.094868 | -0.327837 | 0.114580  |
| C | -0.975877 | 0.805819  | -0.267414 |
| C | -3.691619 | 0.400788  | -0.909284 |
| H | -3.672008 | -1.054899 | 0.672251  |
| C | -1.597922 | 1.538057  | -1.284728 |
| C | -2.938242 | 1.339355  | -1.610902 |
| H | -4.736563 | 0.236986  | -1.154247 |
| H | -1.008161 | 2.264375  | -1.835239 |
| H | -3.389052 | 1.917748  | -2.412258 |
| C | 0.451593  | 1.143698  | 0.018138  |
| C | 0.719850  | 2.423512  | 0.513166  |
| C | 1.543695  | 0.288743  | -0.241426 |
| C | 2.025040  | 2.849698  | 0.760021  |
| H | -0.115187 | 3.086446  | 0.717530  |
| C | 2.852142  | 0.720975  | 0.004473  |
| C | 3.096285  | 1.997307  | 0.503789  |
| H | 2.200076  | 3.848286  | 1.149899  |
| H | 3.677669  | 0.051028  | -0.205077 |
| H | 4.115945  | 2.321241  | 0.687537  |
| C | 1.311947  | -1.069783 | -0.777142 |
| O | 0.322205  | -1.477716 | -1.362026 |
| O | 2.375782  | -1.887353 | -0.554665 |
| O | 2.156221  | -3.182418 | -1.145636 |
| H | 1.232177  | -3.054004 | -1.483969 |

**TS4a**

|   |           |           |           |
|---|-----------|-----------|-----------|
| O | 2.597489  | -1.940023 | 0.469565  |
| O | 1.979297  | 0.642130  | 0.319441  |
| H | 1.690948  | -2.222146 | -0.041366 |
| C | -0.045696 | 0.577932  | 1.609885  |
| O | 1.314755  | 0.270939  | 1.558500  |
| O | -0.652549 | 0.062764  | 2.510380  |
| C | -0.202686 | -1.408826 | -0.712605 |
| O | 0.419148  | -2.465372 | -0.376096 |
| O | 0.344273  | -0.391480 | -1.238716 |
| H | 1.304139  | 0.278913  | -0.400305 |
| C | -0.595169 | 1.540657  | 0.614809  |
| C | -0.031225 | 2.817036  | 0.547982  |
| C | -1.708225 | 1.199919  | -0.180565 |

|   |           |           |           |
|---|-----------|-----------|-----------|
| C | -0.584254 | 3.790283  | -0.281336 |
| H | 0.837314  | 3.045061  | 1.157246  |
| C | -2.242395 | 2.191853  | -1.011015 |
| C | -1.694710 | 3.473390  | -1.060950 |
| H | -0.148780 | 4.784170  | -0.318100 |
| H | -3.087053 | 1.938838  | -1.644177 |
| H | -2.131348 | 4.219143  | -1.719061 |
| C | -1.672799 | -1.361548 | -0.422502 |
| C | -2.351249 | -0.146247 | -0.175965 |
| C | -2.373108 | -2.571837 | -0.369030 |
| C | -3.726398 | -0.197066 | 0.093350  |
| C | -3.740419 | -2.600829 | -0.115023 |
| H | -1.818378 | -3.488321 | -0.536348 |
| C | -4.419383 | -1.404962 | 0.116883  |
| H | -4.248745 | 0.729853  | 0.309972  |
| H | -4.270197 | -3.548516 | -0.089721 |
| H | -5.484645 | -1.410689 | 0.329660  |
| C | 3.242675  | -0.977763 | -0.019125 |
| C | 4.492005  | -0.318328 | 0.520418  |
| C | 3.529399  | -0.533303 | -1.447187 |
| C | 4.642094  | 0.390954  | -0.862652 |
| H | 5.261208  | -1.075501 | 0.713061  |
| H | 4.365715  | 0.296878  | 1.412449  |
| H | 3.931337  | -1.390581 | -2.001708 |
| H | 2.710991  | -0.105691 | -2.027230 |
| H | 5.622280  | 0.311932  | -1.335426 |
| H | 4.335169  | 1.437093  | -0.825766 |

#### TS4apri

|   |           |           |           |
|---|-----------|-----------|-----------|
| C | -2.932813 | -0.732767 | 0.013599  |
| O | -2.469655 | -1.251211 | 1.116048  |
| C | -3.257611 | 0.753099  | -0.259502 |
| H | -3.741775 | 1.196872  | 0.616040  |
| H | -2.426818 | 1.393025  | -0.561879 |
| O | -1.920973 | -1.166278 | -1.177469 |
| C | 0.145759  | -1.506866 | -0.278884 |
| O | -0.565804 | -0.641947 | -0.955938 |
| O | -0.395968 | -2.498950 | 0.301756  |
| H | -1.419623 | -2.227246 | 0.489265  |
| C | -4.282755 | 0.286957  | -1.331436 |
| H | -5.261559 | 0.772507  | -1.311389 |
| H | -3.874349 | 0.340667  | -2.342846 |

|   |           |           |           |
|---|-----------|-----------|-----------|
| C | -4.215870 | -1.153455 | -0.753117 |
| H | -4.149554 | -2.003943 | -1.437641 |
| H | -5.003026 | -1.347505 | -0.016820 |
| C | 1.601259  | -1.340219 | -0.273235 |
| C | 2.345706  | -2.526749 | -0.258719 |
| C | 2.237464  | -0.076343 | -0.237436 |
| C | 3.735435  | -2.488918 | -0.266427 |
| H | 1.820966  | -3.475435 | -0.252721 |
| C | 3.638054  | -0.074449 | -0.231944 |
| C | 4.380554  | -1.254516 | -0.257296 |
| H | 4.303896  | -3.413188 | -0.266255 |
| H | 4.151357  | 0.879413  | -0.174049 |
| H | 5.465345  | -1.204171 | -0.250492 |
| C | 1.557147  | 1.253066  | -0.176365 |
| C | 1.989774  | 2.220248  | -1.097220 |
| C | 0.551887  | 1.619349  | 0.748316  |
| C | 1.471667  | 3.512839  | -1.100132 |
| H | 2.735120  | 1.940401  | -1.835222 |
| C | 0.024808  | 2.915205  | 0.724947  |
| C | 0.488735  | 3.867294  | -0.178025 |
| H | 1.829648  | 4.234591  | -1.828449 |
| H | -0.761436 | 3.162166  | 1.429006  |
| H | 0.074324  | 4.870880  | -0.171349 |
| C | -0.028239 | 0.620687  | 1.702839  |
| O | 0.581672  | -0.354896 | 2.106226  |
| O | -1.312129 | 0.857960  | 1.983377  |
| H | -1.785417 | -0.043224 | 1.983023  |

**Int. 4a**

|   |           |           |           |
|---|-----------|-----------|-----------|
| O | 2.551490  | -2.219474 | 0.184198  |
| O | 1.881587  | 0.024604  | 0.191798  |
| H | 1.763038  | -2.352900 | -0.382015 |
| C | 0.033420  | 0.379136  | 1.588999  |
| O | 1.284851  | -0.168779 | 1.533422  |
| O | -0.672289 | 0.036458  | 2.506508  |
| C | -0.577484 | -1.298953 | -1.275496 |
| O | 0.111377  | -2.308962 | -1.253244 |
| O | -0.243715 | -0.228160 | -2.016624 |
| H | 0.646331  | -0.405348 | -2.373070 |
| C | -0.339343 | 1.425152  | 0.588154  |
| C | 0.451034  | 2.571715  | 0.470328  |
| C | -1.553045 | 1.325524  | -0.114806 |

|   |           |           |           |
|---|-----------|-----------|-----------|
| C | 0.021746  | 3.642077  | -0.310811 |
| H | 1.393438  | 2.624406  | 1.005390  |
| C | -1.973025 | 2.408124  | -0.891959 |
| C | -1.197016 | 3.562553  | -0.985257 |
| H | 0.633851  | 4.535654  | -0.388332 |
| H | -2.903279 | 2.326893  | -1.446189 |
| H | -1.537878 | 4.393691  | -1.595820 |
| C | -1.866612 | -1.155904 | -0.550751 |
| C | -2.358870 | 0.075996  | -0.067469 |
| C | -2.610268 | -2.329412 | -0.370700 |
| C | -3.619572 | 0.098639  | 0.536761  |
| C | -3.860840 | -2.287660 | 0.235075  |
| H | -2.193147 | -3.264805 | -0.727571 |
| C | -4.370256 | -1.066619 | 0.679411  |
| H | -3.991474 | 1.039795  | 0.929368  |
| H | -4.434231 | -3.200778 | 0.361077  |
| H | -5.344291 | -1.023757 | 1.158025  |
| C | 2.958388  | -0.914754 | 0.085956  |
| C | 4.161111  | -0.533346 | 0.967517  |
| C | 3.727226  | -0.389415 | -1.167040 |
| C | 4.705064  | 0.333426  | -0.201773 |
| H | 4.776363  | -1.415173 | 1.160874  |
| H | 3.919287  | -0.039761 | 1.910882  |
| H | 4.185102  | -1.236127 | -1.684791 |
| H | 3.165050  | 0.222808  | -1.880052 |
| H | 5.769991  | 0.241183  | -0.427349 |
| H | 4.455496  | 1.391048  | -0.085706 |

**TS5a**

|   |           |           |           |
|---|-----------|-----------|-----------|
| O | 2.363316  | -1.700214 | -0.865752 |
| O | 2.592430  | 0.336822  | 0.129079  |
| H | 1.489123  | -1.288129 | -1.147445 |
| C | 0.144724  | 0.126658  | 1.473326  |
| O | 1.410227  | -0.159648 | 1.618909  |
| O | -0.721859 | -0.529535 | 2.053965  |
| C | -0.932338 | -1.589598 | -0.758477 |
| O | -0.090929 | -0.925097 | -1.360059 |
| O | -0.711117 | -2.868023 | -0.409975 |
| H | 0.203662  | -3.092978 | -0.662531 |
| C | -0.225343 | 1.304690  | 0.609317  |
| C | 0.630757  | 2.408423  | 0.575064  |
| C | -1.435627 | 1.341598  | -0.117288 |

|   |           |           |           |
|---|-----------|-----------|-----------|
| C | 0.321705  | 3.543851  | -0.170419 |
| H | 1.547551  | 2.361207  | 1.150653  |
| C | -1.720728 | 2.481870  | -0.881503 |
| C | -0.856052 | 3.574594  | -0.913452 |
| H | 0.997568  | 4.394640  | -0.173499 |
| H | -2.635567 | 2.502253  | -1.466507 |
| H | -1.107394 | 4.444302  | -1.514263 |
| C | -2.267355 | -1.094364 | -0.373638 |
| C | -2.479139 | 0.273337  | -0.086654 |
| C | -3.322027 | -2.011416 | -0.297742 |
| C | -3.780775 | 0.665342  | 0.251362  |
| C | -4.607772 | -1.593081 | 0.028942  |
| H | -3.124089 | -3.056398 | -0.507297 |
| C | -4.833878 | -0.246311 | 0.304449  |
| H | -3.956774 | 1.705968  | 0.503502  |
| H | -5.419651 | -2.312285 | 0.074994  |
| H | -5.828447 | 0.098010  | 0.573702  |
| C | 3.076191  | -0.813826 | -0.187046 |
| C | 4.323111  | -1.326990 | 0.523006  |
| C | 4.406211  | 0.339232  | -1.029137 |
| C | 5.244022  | -0.147424 | 0.135937  |
| H | 4.643676  | -2.271448 | 0.078274  |
| H | 4.137931  | -1.464764 | 1.591911  |
| H | 4.464675  | -0.234173 | -1.955313 |
| H | 4.184283  | 1.391263  | -1.174961 |
| H | 6.262761  | -0.439000 | -0.139298 |
| H | 5.290040  | 0.607567  | 0.922447  |

**Int. 5a**

|   |           |           |           |
|---|-----------|-----------|-----------|
| O | 1.898860  | -2.886730 | -1.075700 |
| O | 2.740528  | -0.823018 | -1.089262 |
| H | 1.199559  | -3.407976 | -0.626466 |
| C | -0.475259 | -1.796013 | -0.049624 |
| O | -0.385387 | -2.973408 | 0.294814  |
| O | 0.574003  | -1.059923 | -0.418506 |
| C | -0.288727 | 1.552936  | 1.783069  |
| O | -1.171109 | 0.845370  | 2.223707  |
| O | 0.607527  | 2.157027  | 2.616655  |
| H | 0.339111  | 1.887632  | 3.514291  |
| C | -1.779628 | -1.080806 | -0.120111 |
| C | -2.918077 | -1.868274 | 0.096084  |
| C | -1.923499 | 0.296910  | -0.386165 |



|   |           |           |           |
|---|-----------|-----------|-----------|
| C | -4.193068 | -1.318083 | 0.039308  |
| H | -2.772162 | -2.921683 | 0.306224  |
| C | -3.214204 | 0.832481  | -0.452660 |
| C | -4.340396 | 0.039937  | -0.240636 |
| H | -5.064168 | -1.943925 | 0.207898  |
| H | -3.327138 | 1.892032  | -0.661326 |
| H | -5.329868 | 0.485311  | -0.293401 |
| C | -0.032100 | 1.857947  | 0.353597  |
| C | -0.789712 | 1.232330  | -0.658025 |
| C | 0.984936  | 2.759737  | 0.006022  |
| C | -0.507851 | 1.540427  | -1.992155 |
| C | 1.260086  | 3.044051  | -1.327258 |
| H | 1.555645  | 3.235124  | 0.794645  |
| C | 0.510084  | 2.428903  | -2.329729 |
| H | -1.087812 | 1.055356  | -2.770828 |
| H | 2.050886  | 3.743284  | -1.581685 |
| H | 0.716751  | 2.639517  | -3.374948 |
| C | 1.938050  | -1.697915 | -0.401005 |
| C | 2.431769  | -1.727192 | 1.051182  |
| C | 3.489063  | 0.014162  | -0.186366 |
| C | 2.991920  | -0.313526 | 1.230309  |
| H | 3.225706  | -2.479511 | 1.103612  |
| H | 1.644113  | -2.001772 | 1.754062  |
| H | 4.551562  | -0.223833 | -0.315563 |
| H | 3.320131  | 1.055901  | -0.469923 |
| H | 3.794513  | -0.260836 | 1.971168  |
| H | 2.207468  | 0.382756  | 1.533542  |

### TS6a

|   |           |           |           |
|---|-----------|-----------|-----------|
| O | 2.601069  | 2.641097  | 0.720598  |
| O | 3.823700  | 0.849359  | 1.136763  |
| H | 1.569971  | 2.801684  | 0.372674  |
| C | -0.149031 | 1.588381  | 0.428003  |
| O | 0.292007  | 2.754363  | 0.074057  |
| O | 0.566100  | 0.668963  | 0.876697  |
| C | -0.237086 | -1.111558 | -1.788480 |
| O | -0.693471 | -0.065975 | -2.204480 |
| O | 0.687119  | -1.800335 | -2.529499 |
| H | 0.775123  | -1.281571 | -3.349933 |
| C | -1.623903 | 1.377151  | 0.241650  |
| C | -2.449588 | 2.491576  | 0.070421  |
| C | -2.187178 | 0.086652  | 0.221713  |

|   |           |           |           |
|---|-----------|-----------|-----------|
| C | -3.824193 | 2.350305  | -0.104845 |
| H | -1.985695 | 3.471144  | 0.076534  |
| C | -3.569905 | -0.043059 | 0.045249  |
| C | -4.386422 | 1.075566  | -0.118912 |
| H | -4.450339 | 3.229076  | -0.230995 |
| H | -4.004096 | -1.038685 | 0.026290  |
| H | -5.456445 | 0.946745  | -0.257265 |
| C | -0.550880 | -1.777067 | -0.502350 |
| C | -1.418705 | -1.177423 | 0.438881  |
| C | 0.044688  | -3.015261 | -0.215282 |
| C | -1.663745 | -1.862750 | 1.635001  |
| C | -0.200796 | -3.669414 | 0.986895  |
| H | 0.700114  | -3.462912 | -0.952509 |
| C | -1.060843 | -3.086333 | 1.916443  |
| H | -2.331893 | -1.408083 | 2.359367  |
| H | 0.268531  | -4.627045 | 1.191566  |
| H | -1.266689 | -3.583735 | 2.860224  |
| C | 2.979308  | 1.501960  | 0.373774  |
| C | 2.729888  | 0.779305  | -0.922894 |
| C | 4.145552  | -0.448514 | 0.536247  |
| C | 3.070551  | -0.662572 | -0.534113 |
| H | 3.452028  | 1.187970  | -1.646741 |
| H | 1.725537  | 0.946427  | -1.303723 |
| H | 5.157921  | -0.365887 | 0.129177  |
| H | 4.133356  | -1.172971 | 1.350370  |
| H | 3.424749  | -1.271666 | -1.367447 |
| H | 2.189351  | -1.131934 | -0.095083 |

## **TSI**

|   |           |           |           |
|---|-----------|-----------|-----------|
| O | -0.393273 | 1.214421  | -3.081028 |
| O | 1.151130  | 0.433829  | -1.164750 |
| H | -1.219718 | 0.712706  | -2.628891 |
| C | 2.956153  | -1.082427 | -1.364414 |
| O | 2.327991  | 0.021281  | -1.896785 |
| O | 3.933871  | -1.451449 | -1.976821 |
| C | -1.736733 | -0.975418 | -1.157982 |
| O | -2.171688 | 0.060273  | -1.772291 |
| O | -0.536278 | -1.358748 | -1.158140 |
| H | 0.435058  | -0.379141 | -1.279740 |
| C | 2.348646  | -1.797405 | -0.207001 |
| C | 2.042954  | -1.227327 | 1.047036  |
| C | 2.060664  | -3.142564 | -0.462483 |

|   |           |           |           |
|---|-----------|-----------|-----------|
| C | 1.394770  | -2.035117 | 1.989576  |
| C | 1.404691  | -3.920815 | 0.485384  |
| C | 1.061156  | -3.358860 | 1.712289  |
| H | 1.180184  | -1.619431 | 2.969057  |
| H | 1.166699  | -4.956703 | 0.265752  |
| H | 0.552680  | -3.954059 | 2.464785  |
| C | -2.746507 | -1.768630 | -0.395999 |
| C | -2.846698 | -3.145903 | -0.605147 |
| C | -3.613885 | -1.117301 | 0.498902  |
| C | -3.850895 | -3.876711 | 0.026142  |
| C | -4.610092 | -1.865023 | 1.133346  |
| C | -4.741047 | -3.231790 | 0.885577  |
| H | -3.940067 | -4.943860 | -0.153799 |
| H | -5.275700 | -1.368822 | 1.833142  |
| H | -5.528746 | -3.794671 | 1.377618  |
| C | 0.226299  | 1.843740  | -2.159595 |
| C | 1.354378  | 2.833647  | -2.321991 |
| C | -0.304807 | 2.513964  | -0.898196 |
| C | 0.974074  | 3.407026  | -0.920332 |
| H | 1.141802  | 3.505331  | -3.160768 |
| H | 2.351896  | 2.410196  | -2.447778 |
| H | -1.235282 | 3.045480  | -1.125390 |
| H | -0.476218 | 1.887184  | -0.022794 |
| H | 0.792611  | 4.482684  | -0.888155 |
| H | 1.689532  | 3.131741  | -0.147370 |
| H | -2.143398 | -3.629117 | -1.275762 |
| H | 2.329092  | -3.560213 | -1.426870 |
| C | -3.382856 | 0.304463  | 0.906679  |
| C | -4.117892 | 1.392789  | 0.406344  |
| C | -2.422892 | 0.539130  | 1.901353  |
| C | -3.899378 | 2.676131  | 0.921389  |
| C | -2.190211 | 1.824313  | 2.390043  |
| C | -2.931595 | 2.899372  | 1.897220  |
| H | -1.872475 | -0.308026 | 2.301496  |
| H | -4.507158 | 3.491696  | 0.543231  |
| H | -1.450674 | 1.980051  | 3.170586  |
| H | -2.767582 | 3.901800  | 2.281607  |
| C | 2.385251  | 0.164756  | 1.438405  |
| C | 3.659604  | 0.733853  | 1.244334  |
| C | 1.397596  | 0.955331  | 2.043199  |
| C | 3.914091  | 2.055854  | 1.628064  |
| C | 1.660057  | 2.259844  | 2.450275  |
| C | 2.923876  | 2.816281  | 2.244380  |

|   |           |           |           |
|---|-----------|-----------|-----------|
| H | 0.402191  | 0.542176  | 2.160903  |
| H | 4.901580  | 2.472058  | 1.459164  |
| H | 0.871410  | 2.849549  | 2.908390  |
| H | 3.134859  | 3.834902  | 2.555057  |
| C | -5.180501 | 1.253750  | -0.654720 |
| O | -6.254041 | 1.806870  | -0.550680 |
| O | -4.867989 | 0.512302  | -1.724950 |
| H | -3.902693 | 0.290753  | -1.734679 |
| C | 4.775611  | -0.092337 | 0.687071  |
| O | 5.099744  | -1.193452 | 1.045250  |
| O | 5.324960  | 0.596777  | -0.363280 |
| O | 6.358873  | -0.168523 | -1.013482 |
| H | 5.800413  | -0.832592 | -1.478016 |

## B

|   |           |           |           |
|---|-----------|-----------|-----------|
| O | -0.051763 | -1.471584 | -2.812527 |
| O | -1.217882 | -0.425215 | -1.080038 |
| H | 0.711699  | -0.871631 | -2.695378 |
| C | -3.178338 | 0.814705  | -1.512518 |
| O | -2.446577 | -0.269769 | -1.871803 |
| O | -4.197471 | 0.986259  | -2.152425 |
| C | 1.735821  | 1.150640  | -0.791579 |
| O | 1.933360  | 0.234275  | -1.593688 |
| O | 0.530583  | 1.606541  | -0.493809 |
| H | -0.154272 | 1.031551  | -0.922469 |
| C | -2.689690 | 1.772352  | -0.474509 |
| C | -2.372681 | 1.460620  | 0.866507  |
| C | -2.614432 | 3.096704  | -0.926290 |
| C | -1.954975 | 2.508758  | 1.698071  |
| C | -2.174458 | 4.114643  | -0.086903 |
| C | -1.842942 | 3.815596  | 1.232773  |
| H | -1.738161 | 2.287963  | 2.738182  |
| H | -2.106108 | 5.132259  | -0.458371 |
| H | -1.513779 | 4.600312  | 1.907360  |
| C | 2.846208  | 1.839109  | -0.089803 |
| C | 2.930157  | 3.234469  | -0.119674 |
| C | 3.848953  | 1.067772  | 0.526169  |
| C | 4.046221  | 3.873079  | 0.415580  |
| C | 4.957580  | 1.726378  | 1.064079  |
| C | 5.065075  | 3.115965  | 0.994772  |
| H | 4.122254  | 4.955227  | 0.376235  |
| H | 5.731398  | 1.140305  | 1.549909  |

|   |           |           |           |
|---|-----------|-----------|-----------|
| H | 5.940063  | 3.607978  | 1.408840  |
| C | -0.592239 | -1.651247 | -1.563793 |
| C | -1.479880 | -2.899337 | -1.431670 |
| C | 0.347831  | -2.165991 | -0.440826 |
| C | -0.443940 | -3.502768 | -0.440558 |
| H | -1.624041 | -3.427543 | -2.375591 |
| H | -2.449147 | -2.676010 | -0.983364 |
| H | 1.392809  | -2.220117 | -0.745857 |
| H | 0.273290  | -1.603817 | 0.488476  |
| H | 0.123259  | -4.339597 | -0.854754 |
| H | -0.851315 | -3.793192 | 0.529956  |
| H | 2.131521  | 3.806284  | -0.581113 |
| H | -2.898262 | 3.313415  | -1.950678 |
| C | 3.673925  | -0.400614 | 0.755833  |
| C | 4.313943  | -1.385559 | -0.015856 |
| C | 2.890455  | -0.798656 | 1.847456  |
| C | 4.186404  | -2.734754 | 0.333289  |
| C | 2.739477  | -2.146660 | 2.168637  |
| C | 3.391935  | -3.119271 | 1.410411  |
| H | 2.412754  | -0.035274 | 2.455397  |
| H | 4.717438  | -3.473193 | -0.258369 |
| H | 2.125674  | -2.434966 | 3.017309  |
| H | 3.287750  | -4.170768 | 1.660223  |
| C | -2.442075 | 0.097141  | 1.454929  |
| C | -3.549066 | -0.761693 | 1.307391  |
| C | -1.342165 | -0.366013 | 2.191195  |
| C | -3.523009 | -2.052779 | 1.845627  |
| C | -1.331457 | -1.639557 | 2.754076  |
| C | -2.421588 | -2.492085 | 2.576329  |
| H | -0.470190 | 0.274493  | 2.281948  |
| H | -4.382273 | -2.699688 | 1.704366  |
| H | -0.462190 | -1.973020 | 3.313360  |
| H | -2.417119 | -3.489159 | 3.005710  |
| C | 5.171649  | -1.058178 | -1.210273 |
| O | 6.264139  | -1.554412 | -1.369747 |
| O | 4.649070  | -0.200583 | -2.102441 |
| H | 3.695846  | -0.034341 | -1.914411 |
| C | -4.786120 | -0.275970 | 0.621313  |
| O | -5.350582 | 0.766226  | 0.824341  |
| O | -5.126272 | -1.194557 | -0.337792 |
| O | -6.263098 | -0.759048 | -1.109136 |
| H | -5.826410 | -0.073317 | -1.665498 |

## TSII

|   |           |           |           |
|---|-----------|-----------|-----------|
| O | 0.006696  | -1.649018 | 2.867777  |
| O | 0.692095  | -0.839170 | 0.840085  |
| H | -0.775371 | -1.080855 | 2.643470  |
| C | 1.766898  | 1.680722  | 0.849487  |
| O | 1.482967  | 0.688977  | 1.658098  |
| O | 2.229999  | 2.724096  | 1.314857  |
| C | -1.961058 | 1.017919  | 1.566559  |
| O | -2.033139 | -0.163124 | 1.926277  |
| O | -0.964159 | 1.822979  | 1.883818  |
| H | -0.178866 | 1.317235  | 2.217812  |
| C | 1.421863  | 1.609192  | -0.615122 |
| C | 1.928190  | 0.678838  | -1.545723 |
| C | 0.551586  | 2.619557  | -1.044493 |
| C | 1.518175  | 0.793594  | -2.884086 |
| C | 0.145141  | 2.706084  | -2.372737 |
| C | 0.634149  | 1.785599  | -3.299355 |
| H | 1.938299  | 0.109888  | -3.615436 |
| H | -0.537311 | 3.492204  | -2.681565 |
| H | 0.344505  | 1.848394  | -4.344175 |
| C | -3.029216 | 1.643896  | 0.758616  |
| C | -3.492983 | 2.922825  | 1.085996  |
| C | -3.618519 | 0.906050  | -0.285937 |
| C | -4.586736 | 3.458709  | 0.412121  |
| C | -4.712121 | 1.464442  | -0.953824 |
| C | -5.203405 | 2.721159  | -0.599121 |
| H | -4.958541 | 4.443043  | 0.678548  |
| H | -5.167174 | 0.909059  | -1.767869 |
| H | -6.060461 | 3.130322  | -1.125664 |
| C | 0.772831  | -1.741115 | 1.772466  |
| C | 2.005316  | -2.627734 | 1.934822  |
| C | 0.228627  | -2.976824 | 0.560791  |
| C | 1.395168  | -3.794628 | 1.118693  |
| H | 2.230240  | -2.849568 | 2.978493  |
| H | 2.860440  | -2.163227 | 1.443409  |
| H | -0.788080 | -3.193802 | 0.882122  |
| H | 0.280646  | -2.652043 | -0.470618 |
| H | 1.039646  | -4.604320 | 1.760522  |
| H | 2.052738  | -4.197397 | 0.347253  |
| H | -3.008016 | 3.475960  | 1.883430  |
| H | 0.191164  | 3.334816  | -0.313695 |
| C | -3.027186 | -0.365180 | -0.813811 |

|   |           |           |           |
|---|-----------|-----------|-----------|
| C | -3.597964 | -1.629751 | -0.583811 |
| C | -1.932380 | -0.263143 | -1.680369 |
| C | -3.110943 | -2.749211 | -1.267963 |
| C | -1.432090 | -1.387636 | -2.334840 |
| C | -2.031220 | -2.633400 | -2.140916 |
| H | -1.485321 | 0.707859  | -1.859720 |
| H | -3.597799 | -3.705148 | -1.103794 |
| H | -0.591055 | -1.273832 | -3.012041 |
| H | -1.662856 | -3.509360 | -2.667550 |
| C | 2.893398  | -0.405429 | -1.218870 |
| C | 4.075799  | -0.200051 | -0.480694 |
| C | 2.642008  | -1.698682 | -1.701556 |
| C | 4.937859  | -1.267209 | -0.203965 |
| C | 3.521402  | -2.751880 | -1.462039 |
| C | 4.670845  | -2.541758 | -0.698903 |
| H | 1.732265  | -1.873770 | -2.267267 |
| H | 5.833194  | -1.081081 | 0.379854  |
| H | 3.305812  | -3.736789 | -1.867103 |
| H | 5.357592  | -3.358530 | -0.498943 |
| C | -4.733263 | -1.849400 | 0.378923  |
| O | -5.683317 | -2.551332 | 0.114644  |
| O | -4.615687 | -1.245808 | 1.575837  |
| H | -3.717155 | -0.858906 | 1.684966  |
| C | 4.470568  | 1.183337  | -0.062595 |
| O | 4.513628  | 2.147998  | -0.778975 |
| O | 4.720677  | 1.163312  | 1.280813  |
| O | 4.980530  | 2.486355  | 1.790646  |
| H | 4.054722  | 2.834364  | 1.778080  |

### TSIII

|   |           |           |           |
|---|-----------|-----------|-----------|
| O | -0.336456 | -1.276503 | 3.139070  |
| O | 1.242207  | -0.490593 | 1.257542  |
| H | -1.137826 | -0.787846 | 2.694701  |
| C | 3.075120  | 1.008952  | 1.534738  |
| O | 2.421349  | -0.121295 | 2.013060  |
| O | 4.054163  | 1.321633  | 2.161542  |
| C | -1.625163 | 0.932770  | 1.170414  |
| O | -2.092119 | -0.109880 | 1.740187  |
| O | -0.422913 | 1.312015  | 1.237183  |
| H | 0.528387  | 0.336558  | 1.372590  |
| C | 2.466748  | 1.783910  | 0.416256  |
| C | 2.215424  | 1.271183  | -0.870773 |

|   |           |           |           |
|---|-----------|-----------|-----------|
| C | 2.127681  | 3.102342  | 0.731234  |
| C | 1.559246  | 2.095265  | -1.791601 |
| C | 1.471504  | 3.904529  | -0.197604 |
| C | 1.175436  | 3.392854  | -1.458632 |
| H | 1.376973  | 1.716066  | -2.792576 |
| H | 1.192012  | 4.920061  | 0.064853  |
| H | 0.662230  | 4.007263  | -2.192356 |
| C | -2.586634 | 1.751651  | 0.372013  |
| C | -2.683121 | 3.126200  | 0.599760  |
| C | -3.411798 | 1.126919  | -0.579784 |
| C | -3.644387 | 3.879747  | -0.070496 |
| C | -4.364758 | 1.897058  | -1.252820 |
| C | -4.494536 | 3.260612  | -0.987481 |
| H | -3.731093 | 4.944729  | 0.123347  |
| H | -4.996833 | 1.420993  | -1.996391 |
| H | -5.248746 | 3.841222  | -1.510516 |
| C | 0.300686  | -1.891611 | 2.210489  |
| C | 1.407751  | -2.900313 | 2.394818  |
| C | -0.226703 | -2.560289 | 0.947244  |
| C | 1.033612  | -3.478705 | 0.993599  |
| H | 1.173096  | -3.560683 | 3.236473  |
| H | 2.410044  | -2.491583 | 2.528604  |
| H | -1.170635 | -3.071798 | 1.163171  |
| H | -0.371517 | -1.934121 | 0.066917  |
| H | 0.830263  | -4.550760 | 0.969380  |
| H | 1.764472  | -3.224957 | 0.227332  |
| H | -2.009824 | 3.589416  | 1.313823  |
| H | 2.354424  | 3.479712  | 1.722768  |
| C | -3.171694 | -0.288729 | -1.003661 |
| C | -3.932365 | -1.382695 | -0.556957 |
| C | -2.169561 | -0.509535 | -1.959131 |
| C | -3.695648 | -2.657274 | -1.085580 |
| C | -1.919136 | -1.786638 | -2.460336 |
| C | -2.685713 | -2.867217 | -2.020827 |
| H | -1.598344 | 0.342286  | -2.317905 |
| H | -4.322757 | -3.476873 | -0.750060 |
| H | -1.144903 | -1.930781 | -3.208900 |
| H | -2.508106 | -3.863375 | -2.415487 |
| C | 2.606044  | -0.098893 | -1.288853 |
| C | 3.905323  | -0.622558 | -1.125803 |
| C | 1.624298  | -0.922291 | -1.856609 |
| C | 4.177135  | -1.948180 | -1.494196 |
| C | 1.908985  | -2.224737 | -2.253466 |



|   |           |           |           |
|---|-----------|-----------|-----------|
| C | 3.190865  | -2.745954 | -2.066047 |
| H | 0.615589  | -0.535894 | -1.947712 |
| H | 5.180370  | -2.333927 | -1.353388 |
| H | 1.123964  | -2.840619 | -2.682868 |
| H | 3.420287  | -3.764839 | -2.363051 |
| C | -5.040683 | -1.258651 | 0.458420  |
| O | -6.111311 | -1.803659 | 0.294269  |
| O | -4.772562 | -0.541551 | 1.555820  |
| H | -3.805656 | -0.327028 | 1.614499  |
| C | 5.040717  | 0.244126  | -0.690789 |
| O | 5.151445  | 1.426119  | -0.931081 |
| O | 5.983051  | -0.454059 | -0.009934 |
| H | 6.671237  | 0.195879  | 0.226247  |

## D

|   |           |           |           |
|---|-----------|-----------|-----------|
| O | 0.117904  | -2.577837 | 1.111800  |
| O | 1.504146  | -1.850727 | -0.619284 |
| H | -0.468205 | -1.799713 | 0.997010  |
| C | 2.715988  | -1.109867 | 1.311881  |
| O | 2.720218  | -1.922306 | 0.187003  |
| O | 3.461861  | -1.445073 | 2.195093  |
| C | -1.224325 | 0.307730  | -0.738026 |
| O | -1.437338 | -0.421574 | 0.233800  |
| O | -0.143919 | 0.197021  | -1.500272 |
| H | 0.501165  | -0.433029 | -1.085374 |
| C | 1.900033  | 0.138921  | 1.304120  |
| C | 2.180770  | 1.179982  | 0.398793  |
| C | 0.923045  | 0.300007  | 2.289190  |
| C | 1.407741  | 2.343807  | 0.464709  |
| C | 0.163280  | 1.465928  | 2.342061  |
| C | 0.397831  | 2.482906  | 1.415740  |
| H | 1.624464  | 3.153263  | -0.226125 |
| H | -0.624374 | 1.570782  | 3.080322  |
| H | -0.199396 | 3.389211  | 1.442023  |
| C | -2.144563 | 1.396707  | -1.127229 |
| C | -1.615655 | 2.594025  | -1.626481 |
| C | -3.526432 | 1.270927  | -0.880858 |
| C | -2.446556 | 3.687586  | -1.847916 |
| C | -4.345215 | 2.379943  | -1.112120 |
| C | -3.811708 | 3.581403  | -1.579121 |
| H | -2.030865 | 4.619185  | -2.219063 |
| H | -5.411276 | 2.289141  | -0.929718 |

|   |           |           |           |
|---|-----------|-----------|-----------|
| H | -4.466643 | 4.432337  | -1.741398 |
| C | 0.601998  | -2.889899 | -0.133499 |
| C | 1.201348  | -4.293608 | -0.298364 |
| C | -0.358726 | -3.157313 | -1.326733 |
| C | 0.513287  | -4.389878 | -1.688397 |
| H | 0.764008  | -4.968482 | 0.440894  |
| H | 2.289139  | -4.354644 | -0.254582 |
| H | -1.347957 | -3.419812 | -0.943273 |
| H | -0.458843 | -2.367847 | -2.075105 |
| H | -0.023036 | -5.316485 | -1.905043 |
| H | 1.203526  | -4.177146 | -2.508289 |
| H | -0.548845 | 2.664302  | -1.803148 |
| H | 0.745716  | -0.509140 | 2.989721  |
| C | -4.168454 | -0.024798 | -0.496455 |
| C | -4.610457 | -0.288902 | 0.811574  |
| C | -4.430907 | -0.961850 | -1.502041 |
| C | -5.338853 | -1.451170 | 1.081366  |
| C | -5.119533 | -2.140792 | -1.217989 |
| C | -5.584290 | -2.382266 | 0.075169  |
| H | -4.102832 | -0.751894 | -2.516120 |
| H | -5.693599 | -1.617364 | 2.093383  |
| H | -5.307329 | -2.859567 | -2.010393 |
| H | -6.135621 | -3.290645 | 0.298696  |
| C | 3.266528  | 1.059321  | -0.613921 |
| C | 4.619954  | 0.880374  | -0.252505 |
| C | 2.935163  | 1.081102  | -1.973586 |
| C | 5.586751  | 0.678370  | -1.245063 |
| C | 3.908197  | 0.903390  | -2.956054 |
| C | 5.236552  | 0.689324  | -2.592331 |
| H | 1.896812  | 1.211032  | -2.258294 |
| H | 6.618631  | 0.532320  | -0.947722 |
| H | 3.623434  | 0.919850  | -4.004233 |
| H | 5.997727  | 0.538677  | -3.351843 |
| C | -4.304520 | 0.625460  | 1.965429  |
| O | -5.139098 | 0.985119  | 2.763445  |
| O | -3.012574 | 0.996288  | 2.080189  |
| H | -2.453858 | 0.484575  | 1.450590  |
| C | 5.054086  | 1.011515  | 1.169052  |
| O | 4.481415  | 1.657515  | 2.019999  |
| O | 6.211841  | 0.350654  | 1.416090  |
| H | 6.398265  | 0.498148  | 2.361807  |

**TSIV**

|   |           |           |           |
|---|-----------|-----------|-----------|
| O | 0.058267  | 1.881064  | -2.761971 |
| O | 0.790789  | 0.851369  | -0.851495 |
| H | -0.736360 | 1.322050  | -2.560339 |
| C | 1.837121  | -1.676308 | -1.162104 |
| O | 1.499817  | -0.601751 | -1.859254 |
| O | 2.322117  | -2.631717 | -1.749418 |
| C | -1.941361 | -0.825830 | -1.637141 |
| O | -1.998129 | 0.386422  | -1.878085 |
| O | -0.971744 | -1.615446 | -2.052899 |
| H | -0.163767 | -1.101850 | -2.330664 |
| C | 1.504193  | -1.763324 | 0.305685  |
| C | 2.083342  | -0.978623 | 1.320527  |
| C | 0.584532  | -2.763538 | 0.641638  |
| C | 1.694285  | -1.209858 | 2.648562  |
| C | 0.205009  | -2.976574 | 1.964522  |
| C | 0.763831  | -2.193442 | 2.974599  |
| H | 2.164995  | -0.630278 | 3.437252  |
| H | -0.515654 | -3.753101 | 2.203494  |
| H | 0.489766  | -2.356122 | 4.012911  |
| C | -3.006742 | -1.503098 | -0.865426 |
| C | -3.520580 | -2.726925 | -1.307061 |
| C | -3.539682 | -0.862135 | 0.269192  |
| C | -4.609720 | -3.298896 | -0.655403 |
| C | -4.629336 | -1.455612 | 0.912927  |
| C | -5.171172 | -2.653899 | 0.447151  |
| H | -5.020597 | -4.239234 | -1.009263 |
| H | -5.040843 | -0.975435 | 1.795176  |
| H | -6.024040 | -3.091446 | 0.957501  |
| C | 0.864651  | 1.842184  | -1.691779 |
| C | 2.120615  | 2.702925  | -1.814699 |
| C | 0.408200  | 2.961700  | -0.339143 |
| C | 1.580779  | 3.797784  | -0.861081 |
| H | 2.314999  | 3.023510  | -2.838878 |
| H | 2.977338  | 2.165049  | -1.407819 |
| H | -0.611767 | 3.249912  | -0.585974 |
| H | 0.491233  | 2.529753  | 0.649999  |
| H | 1.228382  | 4.678292  | -1.403946 |
| H | 2.280402  | 4.104721  | -0.082187 |
| H | -3.077334 | -3.207761 | -2.172798 |
| H | 0.163004  | -3.369009 | -0.153023 |
| C | -2.889797 | 0.329554  | 0.903144  |
| C | -3.424398 | 1.627838  | 0.824549  |

|   |           |           |           |
|---|-----------|-----------|-----------|
| C | -1.768477 | 0.105960  | 1.710853  |
| C | -2.874317 | 2.655958  | 1.598366  |
| C | -1.205174 | 1.141873  | 2.454202  |
| C | -1.767602 | 2.418691  | 2.410837  |
| H | -1.348551 | -0.891271 | 1.772549  |
| H | -3.332729 | 3.638480  | 1.550239  |
| H | -0.342761 | 0.934132  | 3.080554  |
| H | -1.349153 | 3.225086  | 3.006654  |
| C | 3.094382  | 0.078846  | 1.061932  |
| C | 4.254598  | -0.128625 | 0.288090  |
| C | 2.895502  | 1.347959  | 1.624001  |
| C | 5.135673  | 0.932982  | 0.042336  |
| C | 3.802955  | 2.385131  | 1.423945  |
| C | 4.920263  | 2.185472  | 0.611750  |
| H | 2.003196  | 1.515544  | 2.219028  |
| H | 6.011793  | 0.752928  | -0.570734 |
| H | 3.632415  | 3.350072  | 1.893405  |
| H | 5.624838  | 2.992411  | 0.434754  |
| C | -4.583349 | 1.979815  | -0.067982 |
| O | -5.499954 | 2.679207  | 0.301495  |
| O | -4.526498 | 1.500048  | -1.323604 |
| H | -3.645541 | 1.098867  | -1.505255 |
| C | 4.655187  | -1.500882 | -0.148136 |
| O | 4.497261  | -2.505241 | 0.508686  |
| O | 5.270272  | -1.493746 | -1.353690 |
| H | 5.448683  | -2.429596 | -1.563866 |

### Me-TS2c-ph

|   |           |           |           |
|---|-----------|-----------|-----------|
| O | -0.067486 | 1.067499  | -2.911891 |
| O | 0.445573  | 0.827871  | -0.682897 |
| H | -0.789249 | 0.471979  | -2.587508 |
| C | 1.615082  | -1.894935 | -0.430574 |
| O | 1.150577  | -0.969706 | -1.213109 |
| O | 1.842404  | -3.025751 | -0.887850 |
| C | -2.073031 | -1.571537 | -1.480514 |
| O | -2.075794 | -0.389198 | -1.845575 |
| O | -1.070767 | -2.400212 | -1.662300 |
| H | -0.233456 | -1.898048 | -1.879814 |
| C | 1.792125  | -1.671175 | 1.046654  |
| C | 2.568915  | -0.665970 | 1.656573  |
| C | 1.144046  | -2.624971 | 1.843524  |
| C | 2.628069  | -0.637540 | 3.060821  |

|   |           |           |           |
|---|-----------|-----------|-----------|
| C | 1.203063  | -2.571738 | 3.232026  |
| C | 1.950098  | -1.565973 | 3.845202  |
| H | 3.259315  | 0.105235  | 3.538335  |
| H | 0.683906  | -3.316343 | 3.827906  |
| H | 2.026280  | -1.517353 | 4.927502  |
| C | -3.263909 | -2.132891 | -0.794537 |
| C | -3.926716 | -3.252701 | -1.300871 |
| C | -3.768121 | -1.429599 | 0.315522  |
| C | -5.135965 | -3.652133 | -0.734554 |
| C | -4.981865 | -1.844781 | 0.869328  |
| C | -5.668571 | -2.938053 | 0.339412  |
| H | -5.662528 | -4.512900 | -1.134822 |
| H | -5.374172 | -1.315708 | 1.732326  |
| H | -6.613796 | -3.242631 | 0.778762  |
| C | 0.654291  | 1.476049  | -1.840468 |
| H | -3.506968 | -3.787120 | -2.147166 |
| H | 0.592244  | -3.415835 | 1.346591  |
| C | -2.952982 | -0.373748 | 0.992653  |
| C | -3.285890 | 0.992514  | 0.986855  |
| C | -1.840382 | -0.791406 | 1.733669  |
| C | -2.563095 | 1.886036  | 1.786242  |
| C | -1.080493 | 0.116356  | 2.468486  |
| C | -1.458306 | 1.457708  | 2.513655  |
| H | -1.574820 | -1.843278 | 1.738998  |
| H | -2.865886 | 2.925847  | 1.791951  |
| H | -0.209899 | -0.231042 | 3.012220  |
| H | -0.887864 | 2.169701  | 3.102799  |
| C | 3.403942  | 0.331055  | 0.932793  |
| C | 4.304861  | -0.009944 | -0.096005 |
| C | 3.373868  | 1.669454  | 1.354022  |
| C | 5.115238  | 0.964385  | -0.687575 |
| C | 4.204962  | 2.634034  | 0.786736  |
| C | 5.079476  | 2.283629  | -0.242699 |
| H | 2.678217  | 1.948419  | 2.139728  |
| H | 5.790317  | 0.672436  | -1.485387 |
| H | 4.165778  | 3.658892  | 1.145966  |
| H | 5.727752  | 3.028673  | -0.693534 |
| C | -4.320421 | 1.598743  | 0.084939  |
| O | -5.022812 | 2.528788  | 0.419648  |
| O | -4.373390 | 1.116476  | -1.174109 |
| H | -3.630189 | 0.496215  | -1.354318 |
| C | 4.473178  | -1.440418 | -0.511887 |
| O | 4.745566  | -2.358267 | 0.214534  |

|   |           |           |           |
|---|-----------|-----------|-----------|
| O | 4.214556  | -1.519331 | -1.852187 |
| O | 4.224936  | -2.884139 | -2.318257 |
| H | 3.357307  | -3.178688 | -1.938961 |
| C | 2.065789  | 1.828304  | -2.248916 |
| C | -0.116250 | 2.611060  | -0.923738 |
| C | 0.575497  | 3.411396  | -0.003588 |
| C | -1.459584 | 2.866164  | -1.243752 |
| C | -0.048828 | 4.542982  | 0.508193  |
| H | 1.581578  | 3.145436  | 0.291438  |
| C | -2.070306 | 4.002553  | -0.728932 |
| H | -1.992204 | 2.222890  | -1.929084 |
| C | -1.366541 | 4.840957  | 0.143183  |
| H | 0.484383  | 5.185977  | 1.201686  |
| H | -3.103364 | 4.214921  | -0.983265 |
| H | -1.854380 | 5.720502  | 0.552701  |
| H | 2.040741  | 2.493965  | -3.114298 |
| H | 2.557141  | 0.891618  | -2.524661 |
| H | 2.619463  | 2.290800  | -1.435404 |

### Me-TS2c-R

|   |           |           |           |
|---|-----------|-----------|-----------|
| O | 0.198712  | 2.487289  | -1.933650 |
| O | 0.753495  | 0.919355  | -0.333779 |
| H | -0.737520 | 2.208915  | -1.772975 |
| C | 1.375729  | -1.536336 | -1.321672 |
| O | 1.610821  | -0.269480 | -1.547693 |
| O | 1.754715  | -2.348432 | -2.169691 |
| C | -2.097843 | 0.121845  | -1.796801 |
| O | -2.187321 | 1.328969  | -1.541198 |
| O | -1.100610 | -0.397010 | -2.501951 |
| H | -0.394587 | 0.266918  | -2.654033 |
| C | 0.626444  | -2.013023 | -0.109367 |
| C | 1.013284  | -1.794231 | 1.228085  |
| C | -0.486790 | -2.814916 | -0.387338 |
| C | 0.247217  | -2.382527 | 2.245780  |
| C | -1.249562 | -3.371099 | 0.634788  |
| C | -0.874159 | -3.158972 | 1.960775  |
| H | 0.563961  | -2.248052 | 3.275537  |
| H | -2.125010 | -3.965821 | 0.393767  |
| H | -1.446728 | -3.598521 | 2.772192  |
| C | -3.109008 | -0.856943 | -1.359529 |
| C | -3.411411 | -1.953068 | -2.177932 |
| C | -3.783630 | -0.660422 | -0.138054 |

|   |           |           |           |
|---|-----------|-----------|-----------|
| C | -4.411075 | -2.846271 | -1.808504 |
| C | -4.782254 | -1.572664 | 0.216062  |
| C | -5.102344 | -2.648409 | -0.612047 |
| H | -4.652882 | -3.686780 | -2.451139 |
| H | -5.299252 | -1.438334 | 1.160750  |
| H | -5.887071 | -3.338314 | -0.316219 |
| C | 0.957465  | 2.117710  | -0.859907 |
| H | -2.868103 | -2.085522 | -3.107164 |
| H | -0.749389 | -2.991008 | -1.423389 |
| C | -3.389399 | 0.374138  | 0.872266  |
| C | -4.109750 | 1.565243  | 1.069573  |
| C | -2.339593 | 0.064514  | 1.744025  |
| C | -3.803375 | 2.394681  | 2.153766  |
| C | -2.020416 | 0.910895  | 2.804696  |
| C | -2.758639 | 2.076034  | 3.018259  |
| H | -1.784426 | -0.852037 | 1.596267  |
| H | -4.396204 | 3.291487  | 2.301799  |
| H | -1.208027 | 0.643679  | 3.474908  |
| H | -2.525655 | 2.730243  | 3.853208  |
| C | 2.223463  | -1.032994 | 1.642513  |
| C | 3.518564  | -1.360929 | 1.197877  |
| C | 2.087441  | 0.018939  | 2.559006  |
| C | 4.630663  | -0.645583 | 1.656203  |
| C | 3.196055  | 0.720740  | 3.026715  |
| C | 4.474730  | 0.385706  | 2.578806  |
| H | 1.089906  | 0.293142  | 2.887930  |
| H | 5.616456  | -0.913483 | 1.290427  |
| H | 3.061905  | 1.532399  | 3.735956  |
| H | 5.342649  | 0.929276  | 2.938976  |
| C | -5.213797 | 2.005005  | 0.148027  |
| O | -6.283648 | 2.403311  | 0.547447  |
| O | -4.922974 | 1.958910  | -1.167014 |
| H | -3.965393 | 1.776388  | -1.294338 |
| C | 3.706552  | -2.509633 | 0.254719  |
| O | 3.281271  | -3.624607 | 0.402051  |
| O | 4.383583  | -2.042218 | -0.837349 |
| O | 4.474478  | -3.042680 | -1.871642 |
| H | 3.550866  | -2.981941 | -2.217723 |
| C | 0.184485  | 2.790393  | 0.685426  |
| H | 0.852459  | 2.557176  | 1.508003  |
| H | 0.182785  | 3.843310  | 0.403752  |
| H | -0.807083 | 2.359187  | 0.781330  |
| C | 2.342001  | 2.675325  | -0.931882 |

|   |          |          |           |
|---|----------|----------|-----------|
| C | 3.401977 | 1.980810 | -0.345173 |
| C | 2.568712 | 3.903730 | -1.564114 |
| C | 4.688874 | 2.509741 | -0.398051 |
| H | 3.218786 | 1.023079 | 0.117324  |
| C | 3.856967 | 4.431018 | -1.607980 |
| H | 1.740243 | 4.429436 | -2.026056 |
| C | 4.918987 | 3.735499 | -1.024393 |
| H | 5.510356 | 1.955803 | 0.045367  |
| H | 4.033694 | 5.381650 | -2.102579 |
| H | 5.923697 | 4.146779 | -1.063858 |

### Me-TS4c-ph

|   |           |           |           |
|---|-----------|-----------|-----------|
| O | -0.441139 | 1.148098  | 3.029914  |
| O | -1.429802 | 0.606919  | 0.968766  |
| H | 0.429791  | 1.344189  | 2.618871  |
| C | -1.455679 | -2.184188 | 0.955242  |
| O | -1.935850 | -1.141832 | 1.604221  |
| O | -1.458563 | -3.244910 | 1.568692  |
| C | 1.803868  | -0.611982 | 1.833170  |
| O | 1.981784  | 0.613618  | 1.904448  |
| O | 0.832887  | -1.238325 | 2.472519  |
| H | 0.217915  | -0.577220 | 2.886507  |
| C | -0.969563 | -2.113553 | -0.458221 |
| C | -1.580574 | -1.388958 | -1.504924 |
| C | 0.111428  | -2.958951 | -0.737121 |
| C | -1.064207 | -1.546615 | -2.801198 |
| C | 0.621514  | -3.086302 | -2.025126 |
| C | 0.020876  | -2.380003 | -3.065998 |
| H | -1.548301 | -1.020123 | -3.617888 |
| H | 1.474791  | -3.731322 | -2.209377 |
| H | 0.391934  | -2.474493 | -4.082415 |
| C | 2.676958  | -1.497436 | 1.038111  |
| C | 2.917341  | -2.804068 | 1.483262  |
| C | 3.276910  | -1.017484 | -0.141270 |
| C | 3.784781  | -3.634155 | 0.781789  |
| C | 4.144447  | -1.869092 | -0.833378 |
| C | 4.405958  | -3.159694 | -0.374642 |
| H | 3.976954  | -4.642050 | 1.135755  |
| H | 4.602226  | -1.512557 | -1.750558 |
| H | 5.088157  | -3.798271 | -0.928143 |
| C | -1.481532 | 1.357953  | 2.109129  |
| H | 2.422547  | -3.152904 | 2.382845  |



|   |           |           |           |
|---|-----------|-----------|-----------|
| H | 0.543005  | -3.520701 | 0.082200  |
| C | 2.932436  | 0.288903  | -0.790186 |
| C | 3.781920  | 1.408022  | -0.741575 |
| C | 1.801449  | 0.332005  | -1.613513 |
| C | 3.533394  | 2.509259  | -1.568556 |
| C | 1.538074  | 1.448091  | -2.404594 |
| C | 2.417556  | 2.531662  | -2.401785 |
| H | 1.141058  | -0.523175 | -1.646664 |
| H | 4.230229  | 3.340951  | -1.542620 |
| H | 0.659347  | 1.454243  | -3.042894 |
| H | 2.232529  | 3.390979  | -3.040038 |
| C | -2.726982 | -0.448895 | -1.349393 |
| C | -3.949250 | -0.760067 | -0.717616 |
| C | -2.568192 | 0.841361  | -1.873367 |
| C | -4.944615 | 0.218640  | -0.595165 |
| C | -3.573355 | 1.798487  | -1.780356 |
| C | -4.767070 | 1.491544  | -1.128686 |
| H | -1.616665 | 1.105343  | -2.322503 |
| H | -5.872355 | -0.042412 | -0.099409 |
| H | -3.411642 | 2.788320  | -2.195066 |
| H | -5.556429 | 2.232676  | -1.042370 |
| C | 4.963902  | 1.486547  | 0.183888  |
| O | 6.049554  | 1.889598  | -0.167869 |
| O | 4.727870  | 1.113875  | 1.456326  |
| H | 3.763541  | 0.976803  | 1.601187  |
| C | -4.248141 | -2.141707 | -0.252674 |
| O | -3.755321 | -3.156566 | -0.698005 |
| O | -5.184138 | -2.168867 | 0.730102  |
| H | -5.299240 | -3.112581 | 0.947973  |
| C | -2.790544 | 1.289931  | 2.877467  |
| H | -2.774799 | 0.382126  | 3.481550  |
| H | -2.891873 | 2.158338  | 3.533190  |
| H | -3.633747 | 1.226711  | 2.188696  |
| C | -1.290463 | 2.546713  | 1.148952  |
| C | -2.385193 | 3.366000  | 0.810226  |
| C | -0.023877 | 2.831051  | 0.601524  |
| C | -2.199901 | 4.482361  | 0.006599  |
| H | -3.370868 | 3.137114  | 1.193337  |
| C | 0.149591  | 3.945895  | -0.212446 |
| H | 0.820124  | 2.179574  | 0.793308  |
| C | -0.931830 | 4.777202  | -0.506555 |
| H | -3.044875 | 5.124410  | -0.223984 |
| H | 1.131177  | 4.152824  | -0.622081 |

|   |           |          |           |
|---|-----------|----------|-----------|
| H | -0.791394 | 5.649460 | -1.138396 |
|---|-----------|----------|-----------|

**Me-TS4c-R**

|   |           |           |           |
|---|-----------|-----------|-----------|
| O | -0.106088 | 2.871625  | -1.480195 |
| O | 0.568617  | 0.944564  | -0.461922 |
| H | -0.949171 | 2.340216  | -1.476991 |
| C | 1.716855  | -0.977433 | -1.648078 |
| O | 0.951079  | 0.013447  | -2.112268 |
| O | 2.901977  | -1.050912 | -1.929950 |
| C | -2.444680 | 0.202580  | -1.705305 |
| O | -2.268232 | 1.336266  | -1.229411 |
| O | -1.587276 | -0.435741 | -2.456852 |
| H | -0.621613 | -0.112293 | -2.373290 |
| C | 1.045923  | -1.998055 | -0.765845 |
| C | 1.490577  | -2.237134 | 0.548786  |
| C | -0.021270 | -2.744176 | -1.276768 |
| C | 0.831388  | -3.197221 | 1.324467  |
| C | -0.644131 | -3.724937 | -0.507538 |
| C | -0.220789 | -3.947595 | 0.802543  |
| H | 1.174373  | -3.372080 | 2.340191  |
| H | -1.458465 | -4.306652 | -0.929553 |
| H | -0.702574 | -4.704180 | 1.415262  |
| C | -3.715281 | -0.517883 | -1.441794 |
| C | -4.443360 | -1.081383 | -2.492998 |
| C | -4.203776 | -0.556254 | -0.122858 |
| C | -5.695453 | -1.640320 | -2.247753 |
| C | -5.458713 | -1.127199 | 0.105505  |
| C | -6.206707 | -1.650780 | -0.949542 |
| H | -6.270609 | -2.061160 | -3.066642 |
| H | -5.838992 | -1.170403 | 1.121379  |
| H | -7.184169 | -2.081172 | -0.753158 |
| C | 0.784296  | 2.214227  | -0.724698 |
| H | -4.034355 | -1.055847 | -3.497837 |
| H | -0.364707 | -2.558569 | -2.287373 |
| C | -3.357299 | -0.147012 | 1.042003  |
| C | -3.572653 | 1.038027  | 1.768221  |
| C | -2.364814 | -1.035675 | 1.473461  |
| C | -2.843520 | 1.280925  | 2.938053  |
| C | -1.617910 | -0.771095 | 2.620392  |
| C | -1.864863 | 0.384533  | 3.363626  |
| H | -2.185392 | -1.946819 | 0.912973  |
| H | -3.056987 | 2.184583  | 3.499888  |

|   |           |           |           |
|---|-----------|-----------|-----------|
| H | -0.860805 | -1.482600 | 2.934000  |
| H | -1.301403 | 0.585652  | 4.270380  |
| C | 2.576136  | -1.434095 | 1.181747  |
| C | 3.933735  | -1.540696 | 0.821585  |
| C | 2.219939  | -0.518127 | 2.179516  |
| C | 4.886505  | -0.717879 | 1.436220  |
| C | 3.175051  | 0.285057  | 2.801670  |
| C | 4.513882  | 0.191658  | 2.422655  |
| H | 1.172309  | -0.427311 | 2.446855  |
| H | 5.924677  | -0.809433 | 1.138467  |
| H | 2.873016  | 0.985804  | 3.575416  |
| H | 5.263714  | 0.819986  | 2.893554  |
| C | -4.558802 | 2.090992  | 1.338862  |
| O | -5.311698 | 2.630977  | 2.118372  |
| O | -4.529931 | 2.431148  | 0.038178  |
| H | -3.758400 | 2.020005  | -0.416978 |
| C | 4.375150  | -2.580119 | -0.154031 |
| O | 3.804780  | -3.627831 | -0.364664 |
| O | 5.550939  | -2.258094 | -0.746265 |
| H | 5.742560  | -2.993124 | -1.357096 |
| C | 0.287777  | 2.327508  | 1.021744  |
| H | 1.078511  | 1.926492  | 1.644883  |
| H | 0.252818  | 3.417481  | 1.004424  |
| H | -0.686508 | 1.875859  | 1.179789  |
| C | 2.172380  | 2.756453  | -0.811401 |
| C | 3.257060  | 1.951464  | -0.451169 |
| C | 2.379400  | 4.075562  | -1.232177 |
| C | 4.549397  | 2.462763  | -0.526932 |
| H | 3.095127  | 0.929085  | -0.143086 |
| C | 3.674476  | 4.582916  | -1.297353 |
| H | 1.530205  | 4.687134  | -1.515820 |
| C | 4.760576  | 3.777448  | -0.945359 |
| H | 5.387397  | 1.825169  | -0.264880 |
| H | 3.836935  | 5.604242  | -1.628748 |
| H | 5.770304  | 4.174074  | -1.002937 |

**tBu-TS2c-ph**

|   |           |           |           |
|---|-----------|-----------|-----------|
| O | -0.146853 | 1.657989  | -2.699450 |
| O | 0.635176  | 0.839584  | -0.713730 |
| H | -0.866098 | 1.039539  | -2.415870 |
| C | 1.804800  | -1.839626 | -1.085218 |
| O | 1.364214  | -0.748087 | -1.654588 |

|   |           |           |           |
|---|-----------|-----------|-----------|
| O | 2.488689  | -2.633447 | -1.736073 |
| C | -2.055822 | -1.147625 | -1.678879 |
| O | -2.074926 | 0.088877  | -1.723343 |
| O | -1.047204 | -1.874213 | -2.110174 |
| H | -0.226034 | -1.314756 | -2.225798 |
| C | 1.335067  | -2.246228 | 0.292834  |
| C | 1.724650  | -1.678509 | 1.520516  |
| C | 0.483029  | -3.360899 | 0.288030  |
| C | 1.224963  | -2.247994 | 2.704538  |
| C | -0.012137 | -3.901062 | 1.470107  |
| C | 0.364355  | -3.340455 | 2.690423  |
| H | 1.558343  | -1.838178 | 3.653224  |
| H | -0.672307 | -4.762784 | 1.437300  |
| H | 0.006127  | -3.760504 | 3.625739  |
| C | -3.225075 | -1.889013 | -1.158995 |
| C | -3.753240 | -2.963702 | -1.880563 |
| C | -3.862883 | -1.409692 | 0.002657  |
| C | -4.958199 | -3.538708 | -1.483860 |
| C | -5.070192 | -2.001368 | 0.383473  |
| C | -5.623020 | -3.044280 | -0.361297 |
| H | -5.379005 | -4.362060 | -2.052405 |
| H | -5.563574 | -1.650920 | 1.284656  |
| H | -6.566444 | -3.483569 | -0.051041 |
| C | 0.719453  | 1.790941  | -1.661643 |
| H | -3.231439 | -3.321105 | -2.762366 |
| H | 0.210723  | -3.801399 | -0.664246 |
| C | -3.197798 | -0.444058 | 0.936215  |
| C | -3.605305 | 0.890258  | 1.119615  |
| C | -2.187796 | -0.958617 | 1.759119  |
| C | -3.055450 | 1.645570  | 2.161760  |
| C | -1.610894 | -0.180775 | 2.761013  |
| C | -2.056692 | 1.122586  | 2.975581  |
| H | -1.864130 | -1.984312 | 1.622808  |
| H | -3.417510 | 2.656979  | 2.301849  |
| H | -0.831378 | -0.610847 | 3.380078  |
| H | -1.627554 | 1.729455  | 3.767381  |
| C | 2.673727  | -0.542755 | 1.685437  |
| C | 3.976117  | -0.536794 | 1.148979  |
| C | 2.294362  | 0.537952  | 2.494702  |
| C | 4.848986  | 0.525771  | 1.404860  |
| C | 3.175672  | 1.580861  | 2.774495  |
| C | 4.458808  | 1.579616  | 2.226969  |
| H | 1.283364  | 0.562571  | 2.888361  |

|   |           |           |           |
|---|-----------|-----------|-----------|
| H | 5.840592  | 0.509689  | 0.964940  |
| H | 2.855330  | 2.398565  | 3.415017  |
| H | 5.149486  | 2.390413  | 2.437523  |
| C | -4.562925 | 1.616112  | 0.217790  |
| O | -5.346263 | 2.444564  | 0.630372  |
| O | -4.458898 | 1.358307  | -1.099613 |
| H | -3.657667 | 0.818618  | -1.292739 |
| C | 4.459872  | -1.699413 | 0.338803  |
| O | 4.444480  | -2.853603 | 0.672718  |
| O | 4.871551  | -1.213078 | -0.872247 |
| O | 5.234315  | -2.275832 | -1.775731 |
| H | 4.326424  | -2.612089 | -1.978691 |
| C | 2.072481  | 2.358755  | -2.181869 |
| C | 0.019584  | 2.628215  | -0.401064 |
| C | 0.709343  | 3.027406  | 0.750204  |
| C | -1.297183 | 3.061035  | -0.635870 |
| C | 0.131838  | 3.967970  | 1.598407  |
| H | 1.663908  | 2.587295  | 0.989017  |
| C | -1.859113 | 4.002250  | 0.217173  |
| H | -1.840328 | 2.730045  | -1.508825 |
| C | -1.145738 | 4.463007  | 1.329487  |
| H | 0.673472  | 4.295344  | 2.480694  |
| H | -2.863790 | 4.363133  | 0.019855  |
| H | -1.598139 | 5.191051  | 1.996338  |
| C | 2.465812  | 1.560953  | -3.449953 |
| H | 1.711374  | 1.664448  | -4.231633 |
| H | 3.415807  | 1.955939  | -3.825892 |
| H | 2.590615  | 0.501692  | -3.218812 |
| C | 3.200973  | 2.212941  | -1.158079 |
| H | 4.151795  | 2.448235  | -1.647139 |
| H | 3.103483  | 2.898336  | -0.313673 |
| H | 3.265103  | 1.192148  | -0.782410 |
| C | 1.865117  | 3.835682  | -2.559548 |
| H | 1.640091  | 4.448388  | -1.680045 |
| H | 2.779795  | 4.225954  | -3.017973 |
| H | 1.048038  | 3.948325  | -3.278453 |

**tBu-TS2c-R**

|   |           |           |           |
|---|-----------|-----------|-----------|
| O | -0.677101 | 2.358732  | -1.571428 |
| O | 0.436034  | 0.927465  | -0.170396 |
| H | -1.364315 | 1.670607  | -1.409568 |
| C | 1.682451  | -1.238280 | -0.786124 |

|   |           |           |           |
|---|-----------|-----------|-----------|
| O | 0.934319  | -0.306951 | -1.384651 |
| O | 2.334792  | -1.990562 | -1.490977 |
| C | -2.521968 | -0.812422 | -1.484630 |
| O | -2.553961 | 0.396610  | -1.226104 |
| O | -1.436224 | -1.454018 | -1.871517 |
| H | -0.623526 | -0.872930 | -1.844432 |
| C | 1.572431  | -1.348782 | 0.709752  |
| C | 2.651646  | -1.180163 | 1.599324  |
| C | 0.298277  | -1.643792 | 1.211755  |
| C | 2.403861  | -1.300245 | 2.974852  |
| C | 0.080565  | -1.793005 | 2.577024  |
| C | 1.139508  | -1.612844 | 3.465320  |
| H | 3.233189  | -1.163850 | 3.661950  |
| H | -0.910419 | -2.041633 | 2.941808  |
| H | 0.985409  | -1.718072 | 4.535251  |
| C | -3.740032 | -1.651070 | -1.411997 |
| C | -3.985086 | -2.592413 | -2.418945 |
| C | -4.686317 | -1.425241 | -0.393195 |
| C | -5.194432 | -3.280653 | -2.451358 |
| C | -5.892346 | -2.130134 | -0.440461 |
| C | -6.152934 | -3.038013 | -1.467267 |
| H | -5.389302 | -3.997106 | -3.243101 |
| H | -6.622950 | -1.969528 | 0.346048  |
| H | -7.101378 | -3.566425 | -1.488546 |
| C | 0.372368  | 2.114504  | -0.735942 |
| H | -3.233169 | -2.757739 | -3.182964 |
| H | -0.527319 | -1.760480 | 0.518785  |
| C | -4.397329 | -0.583568 | 0.810971  |
| C | -4.944071 | 0.697985  | 0.997329  |
| C | -3.650707 | -1.156620 | 1.848427  |
| C | -4.778975 | 1.356345  | 2.220413  |
| C | -3.455928 | -0.477707 | 3.050663  |
| C | -4.030746 | 0.778906  | 3.242442  |
| H | -3.244274 | -2.155077 | 1.712901  |
| H | -5.242233 | 2.329194  | 2.348518  |
| H | -2.873041 | -0.937477 | 3.843183  |
| H | -3.898715 | 1.304092  | 4.183685  |
| C | 4.027661  | -0.771389 | 1.189950  |
| C | 4.875298  | -1.553071 | 0.380944  |
| C | 4.514764  | 0.454512  | 1.665955  |
| C | 6.149854  | -1.089364 | 0.036478  |
| C | 5.792129  | 0.905739  | 1.337549  |
| C | 6.612108  | 0.134391  | 0.514017  |

|   |           |           |           |
|---|-----------|-----------|-----------|
| H | 3.868000  | 1.064314  | 2.289176  |
| H | 6.780027  | -1.703992 | -0.596603 |
| H | 6.140779  | 1.860596  | 1.720296  |
| H | 7.607407  | 0.478843  | 0.250001  |
| C | -5.715191 | 1.420652  | -0.073866 |
| O | -6.754441 | 1.998640  | 0.152059  |
| O | -5.160139 | 1.420946  | -1.298904 |
| H | -4.248880 | 1.048219  | -1.266757 |
| C | 4.416285  | -2.901115 | -0.065888 |
| O | 3.726412  | -3.658980 | 0.566377  |
| O | 4.869200  | -3.118790 | -1.339248 |
| O | 4.258349  | -4.292904 | -1.902297 |
| H | 3.327991  | -3.980534 | -1.934193 |
| C | -0.053386 | 2.813158  | 0.943463  |
| C | 1.640128  | 2.736258  | -1.241626 |
| C | 2.874642  | 2.221666  | -0.836458 |
| C | 1.598084  | 3.810527  | -2.137708 |
| C | 4.058884  | 2.778821  | -1.313196 |
| H | 2.908707  | 1.374840  | -0.165261 |
| C | 2.784005  | 4.371368  | -2.607591 |
| H | 0.639145  | 4.190183  | -2.470203 |
| C | 4.016123  | 3.858880  | -2.195798 |
| H | 5.008421  | 2.356954  | -0.999365 |
| H | 2.745258  | 5.203925  | -3.304095 |
| H | 4.938502  | 4.294096  | -2.569889 |
| C | -0.178032 | 4.294688  | 0.607602  |
| H | -0.888597 | 4.461753  | -0.204782 |
| H | -0.558937 | 4.801171  | 1.504906  |
| H | 0.782774  | 4.741299  | 0.344550  |
| C | 1.060340  | 2.531992  | 1.934775  |
| H | 1.125240  | 1.471190  | 2.185165  |
| H | 2.028673  | 2.871954  | 1.558201  |
| H | 0.849923  | 3.092133  | 2.855877  |
| C | -1.387432 | 2.218080  | 1.362587  |
| H | -1.312757 | 1.156594  | 1.600363  |
| H | -1.731982 | 2.745536  | 2.261017  |
| H | -2.154577 | 2.354363  | 0.597489  |

**tBu-TS4c-ph**

|   |           |          |          |
|---|-----------|----------|----------|
| O | -0.083792 | 1.659418 | 2.490933 |
| O | -1.035677 | 0.735066 | 0.590730 |
| H | 0.825271  | 1.527344 | 2.132679 |

|   |           |           |           |
|---|-----------|-----------|-----------|
| C | -1.741999 | -1.847781 | 1.187216  |
| O | -2.003854 | -0.599800 | 1.544254  |
| O | -2.081339 | -2.694382 | 2.002589  |
| C | 1.916879  | -0.606088 | 1.851206  |
| O | 2.266433  | 0.579127  | 1.803063  |
| O | 0.818770  | -1.014477 | 2.472978  |
| H | 0.287037  | -0.229192 | 2.758825  |
| C | -1.106219 | -2.205281 | -0.113199 |
| C | -1.579285 | -1.790241 | -1.374780 |
| C | -0.040351 | -3.106057 | -0.026641 |
| C | -0.918127 | -2.265298 | -2.516062 |
| C | 0.612142  | -3.557939 | -1.169709 |
| C | 0.170537  | -3.130742 | -2.420952 |
| H | -1.290963 | -1.972422 | -3.492671 |
| H | 1.458882  | -4.230083 | -1.078232 |
| H | 0.663637  | -3.476330 | -3.324681 |
| C | 2.706730  | -1.678580 | 1.215140  |
| C | 2.869543  | -2.911952 | 1.855365  |
| C | 3.325062  | -1.416905 | -0.021722 |
| C | 3.683139  | -3.887790 | 1.287553  |
| C | 4.138127  | -2.410007 | -0.576062 |
| C | 4.325038  | -3.629700 | 0.074600  |
| H | 3.821511  | -4.839607 | 1.790652  |
| H | 4.613232  | -2.221771 | -1.533557 |
| H | 4.966701  | -4.383644 | -0.371914 |
| C | -0.986257 | 1.830734  | 1.427606  |
| H | 2.368882  | -3.088920 | 2.801552  |
| H | 0.277356  | -3.436425 | 0.954185  |
| C | 3.046664  | -0.182916 | -0.821260 |
| C | 4.000959  | 0.837316  | -0.976681 |
| C | 1.836409  | -0.092319 | -1.516135 |
| C | 3.769344  | 1.879410  | -1.878690 |
| C | 1.593383  | 0.974708  | -2.378312 |
| C | 2.568230  | 1.950810  | -2.579249 |
| H | 1.089556  | -0.863327 | -1.384266 |
| H | 4.535603  | 2.638040  | -2.002333 |
| H | 0.644095  | 1.035724  | -2.900648 |
| H | 2.385782  | 2.773728  | -3.262547 |
| C | -2.762345 | -0.910420 | -1.567608 |
| C | -4.025757 | -1.170118 | -0.996299 |
| C | -2.626431 | 0.222402  | -2.379155 |
| C | -5.086084 | -0.278024 | -1.199427 |
| C | -3.695340 | 1.085601  | -2.611051 |



|   |           |           |           |
|---|-----------|-----------|-----------|
| C | -4.928915 | 0.844174  | -2.007891 |
| H | -1.654621 | 0.434206  | -2.813094 |
| H | -6.042949 | -0.489897 | -0.735977 |
| H | -3.558959 | 1.953535  | -3.250615 |
| H | -5.763603 | 1.519093  | -2.170036 |
| C | 5.251346  | 0.894989  | -0.146643 |
| O | 6.348647  | 1.118329  | -0.604991 |
| O | 5.062414  | 0.727103  | 1.179102  |
| H | 4.100883  | 0.712597  | 1.386795  |
| C | -4.300277 | -2.451104 | -0.281078 |
| O | -3.817314 | -3.524774 | -0.566907 |
| O | -5.198114 | -2.295320 | 0.721490  |
| C | -2.324458 | 2.382806  | 2.043987  |
| C | -0.371545 | 2.772903  | 0.309061  |
| C | -1.011734 | 2.938340  | -0.925764 |
| C | 0.808338  | 3.478517  | 0.576502  |
| C | -0.512426 | 3.846867  | -1.855988 |
| H | -1.885775 | 2.349275  | -1.156754 |
| C | 1.304492  | 4.381258  | -0.360213 |
| H | 1.310468  | 3.372095  | 1.529855  |
| C | 0.644202  | 4.573957  | -1.575350 |
| H | -1.023993 | 3.977150  | -2.805586 |
| H | 2.206786  | 4.941302  | -0.134161 |
| H | 1.035909  | 5.281034  | -2.300831 |
| C | -2.140448 | 3.884071  | 2.336142  |
| H | -3.021284 | 4.260081  | 2.867616  |
| H | -1.264015 | 4.057454  | 2.968610  |
| H | -2.025451 | 4.469296  | 1.418827  |
| C | -3.507566 | 2.178857  | 1.089395  |
| H | -3.411428 | 2.770155  | 0.175411  |
| H | -3.626172 | 1.130047  | 0.815612  |
| H | -4.425333 | 2.508380  | 1.589036  |
| C | -2.630645 | 1.676384  | 3.384924  |
| H | -3.554869 | 2.100936  | 3.793133  |
| H | -2.771252 | 0.603701  | 3.255349  |
| H | -1.831744 | 1.842666  | 4.110387  |
| H | -5.294703 | -3.177564 | 1.126781  |

**tBu-TS4c-R**

|   |           |          |           |
|---|-----------|----------|-----------|
| O | -0.628138 | 2.482254 | -1.379202 |
| O | 0.449950  | 0.897225 | -0.129185 |
| H | -1.315641 | 1.780171 | -1.297956 |

|   |           |           |           |
|---|-----------|-----------|-----------|
| C | 1.832396  | -1.102443 | -0.956571 |
| O | 0.941751  | -0.229578 | -1.459143 |
| O | 2.646719  | -1.601871 | -1.711132 |
| C | -2.485741 | -0.703448 | -1.563622 |
| O | -2.498955 | 0.480784  | -1.204634 |
| O | -1.412258 | -1.338123 | -1.983909 |
| H | -0.577310 | -0.786920 | -1.893364 |
| C | 1.715730  | -1.428869 | 0.501046  |
| C | 2.840997  | -1.482517 | 1.347243  |
| C | 0.443060  | -1.688594 | 1.025772  |
| C | 2.646149  | -1.759236 | 2.706671  |
| C | 0.271990  | -2.004494 | 2.368836  |
| C | 1.379064  | -2.028889 | 3.216801  |
| H | 3.512441  | -1.781660 | 3.360734  |
| H | -0.721003 | -2.217551 | 2.750654  |
| H | 1.258889  | -2.260085 | 4.271380  |
| C | -3.727312 | -1.513214 | -1.577917 |
| C | -4.007370 | -2.321924 | -2.685154 |
| C | -4.657908 | -1.382610 | -0.529468 |
| C | -5.237441 | -2.966226 | -2.784787 |
| C | -5.885199 | -2.041610 | -0.644994 |
| C | -6.180977 | -2.813801 | -1.768662 |
| H | -5.459702 | -3.578615 | -3.653045 |
| H | -6.604157 | -1.954187 | 0.163553  |
| H | -7.144983 | -3.308423 | -1.841577 |
| C | 0.416478  | 2.130614  | -0.577319 |
| H | -3.266006 | -2.418252 | -3.471153 |
| H | -0.417789 | -1.642399 | 0.370066  |
| C | -4.329769 | -0.698793 | 0.761379  |
| C | -4.839896 | 0.563827  | 1.109729  |
| C | -3.583303 | -1.410905 | 1.709457  |
| C | -4.642292 | 1.064424  | 2.401037  |
| C | -3.356856 | -0.888257 | 2.982265  |
| C | -3.897028 | 0.349108  | 3.334001  |
| H | -3.202999 | -2.394353 | 1.447591  |
| H | -5.078198 | 2.025672  | 2.652822  |
| H | -2.779537 | -1.456852 | 3.705326  |
| H | -3.740061 | 0.752585  | 4.329885  |
| C | 4.220584  | -1.138507 | 0.896757  |
| C | 4.973984  | -1.927068 | 0.004669  |
| C | 4.794893  | 0.035440  | 1.399339  |
| C | 6.247824  | -1.507019 | -0.392827 |
| C | 6.074066  | 0.439192  | 1.015648  |

|   |           |           |           |
|---|-----------|-----------|-----------|
| C | 6.799847  | -0.329766 | 0.107479  |
| H | 4.217182  | 0.643455  | 2.089346  |
| H | 6.806208  | -2.120558 | -1.089912 |
| H | 6.495655  | 1.354047  | 1.422603  |
| H | 7.792926  | -0.020956 | -0.204922 |
| C | -5.603950 | 1.431992  | 0.146735  |
| O | -6.620050 | 2.010188  | 0.461808  |
| O | -5.070019 | 1.563695  | -1.079819 |
| H | -4.171816 | 1.158907  | -1.116903 |
| C | 4.454802  | -3.248070 | -0.450688 |
| O | 3.632194  | -3.918548 | 0.136205  |
| O | 5.058518  | -3.675921 | -1.586202 |
| H | 4.653036  | -4.540013 | -1.783269 |
| C | -0.001329 | 2.669667  | 1.180802  |
| C | 1.698702  | 2.775521  | -1.009414 |
| C | 2.921789  | 2.203069  | -0.647277 |
| C | 1.682212  | 3.930942  | -1.799015 |
| C | 4.118288  | 2.780807  | -1.064748 |
| H | 2.937849  | 1.295749  | -0.058409 |
| C | 2.880758  | 4.513210  | -2.206583 |
| H | 0.732133  | 4.356761  | -2.099607 |
| C | 4.100626  | 3.940797  | -1.840339 |
| H | 5.058078  | 2.311021  | -0.792679 |
| H | 2.861252  | 5.409053  | -2.820553 |
| H | 5.033199  | 4.391768  | -2.167705 |
| C | 1.102506  | 2.256760  | 2.134887  |
| H | 1.145376  | 1.173676  | 2.266174  |
| H | 2.078758  | 2.617144  | 1.799929  |
| H | 0.900563  | 2.715736  | 3.112443  |
| C | -1.351434 | 2.067191  | 1.526810  |
| H | -1.695970 | 2.513008  | 2.468696  |
| H | -2.105155 | 2.294070  | 0.769885  |
| H | -1.301974 | 0.986462  | 1.661408  |
| C | -0.085701 | 4.178519  | 0.992214  |
| H | -0.456918 | 4.605107  | 1.934289  |
| H | 0.887372  | 4.623450  | 0.775465  |
| H | -0.788810 | 4.443209  | 0.199363  |

## 15. References

- [1] (a) L. R. Krepski, and Hassner, A. *J. Org. Chem.* 1978, 43, 2879. (b) Trost, B. M.; Xie, J. *J. Am. Chem. Soc.* 2008, **130**, 6231.
- [2] H. Yoo, M.-W. Lee, S. Lee, J. Lee, S. Cho, H. Lee, H. G. Cha and H. S. Kim, *ACS Catal.*, 2020, **10**, 8465–8475.
- [3] M. J. T. Frisch, G. W.; Schlegel, H. B.; Scuseria, G. E.; Robb, M. A.; Cheeseman, J. R.; Scalmani, G.; Barone, V.; Petersson, G. A.; Nakatsuji, H.; Li, X.; Caricato, M.; Marenich, A. V.; Bloino, J.; Janesko, B. G.; Gomperts, R.; Mennucci, B.; Hratchian, H. P.; Ortiz, J. V.; Izmaylov, A. F.; Sonnenberg, J. L.; Williams-Young, D.; Ding, F.; Lipparini, F.; Egidi, F.; Goings, J.; Peng, B.; Petrone, A.; Henderson, T.; Ranasinghe, D.; Zakrzewski, V. G.; Gao, J.; Rega, N.; Zheng, G.; Liang, W.; Hada, M.; Ehara, M.; Toyota, K.; Fukuda, R.; Hasegawa, J.; Ishida, M.; Nakajima, T.; Honda, Y.; Kitao, O.; Nakai, H.; Vreven, T.; Throssell, K.; Montgomery, J. A., Jr.; Peralta, J. E.; Ogliaro, F.; Bearpark, M. J.; Heyd, J. J.; Brothers, E. N.; Kudin, K. N.; Staroverov, V. N.; Keith, T. A.; Kobayashi, R.; Normand, J.; Raghavachari, K.; Rendell, A. P.; Burant, J. C.; Iyengar, S. S.; Tomasi, J.; Cossi, M.; Millam, J. M.; Klene, M.; Adamo, C.; Cammi, R.; Ochterski, J. W.; Martin, R. L.; Morokuma, K.; Farkas, O.; Foresman, J. B.; Fox, D. J., Gaussian, Inc., Wallingford CT, 2016.
- [4] (a) S. Grimme, J. Antony, S. Ehrlich, H. Krieg, *J. Chem. Phys.* 2010, 132; (b) S. Grimme, S. Ehrlich, L. Goerigk, *J. Comput. Chem.* 2011, **32**, 1456-1465.
- [5] (a) Y. Zhao, D. G. Truhlar, *Acc. Chem. Res.* 2008, **41**, 157-167; b) Y. Zhao, D. G. Truhlar, *Theor. Chem. Acc.* 2008, **120**, 215-241.
- [6] A. V. Marenich, C. J. Cramer, D. G. Truhlar, *J. Phys. Chem. B* 2009, 113, 6378-6396.

# 16NMR spectra

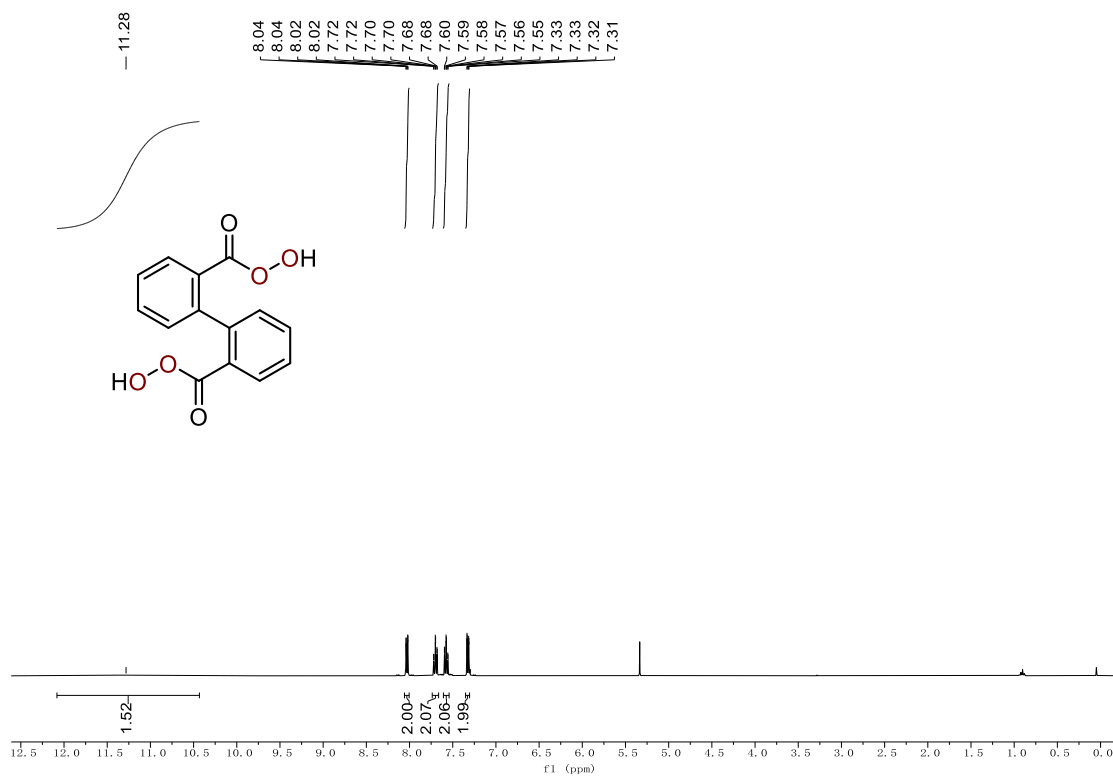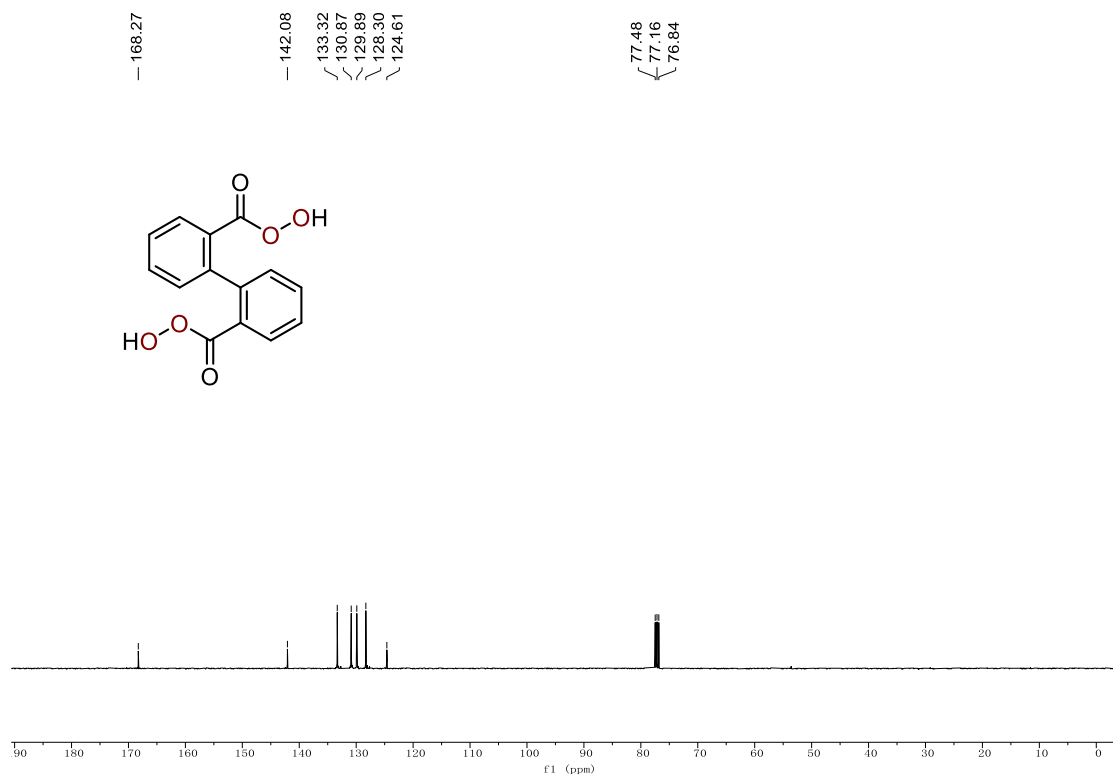



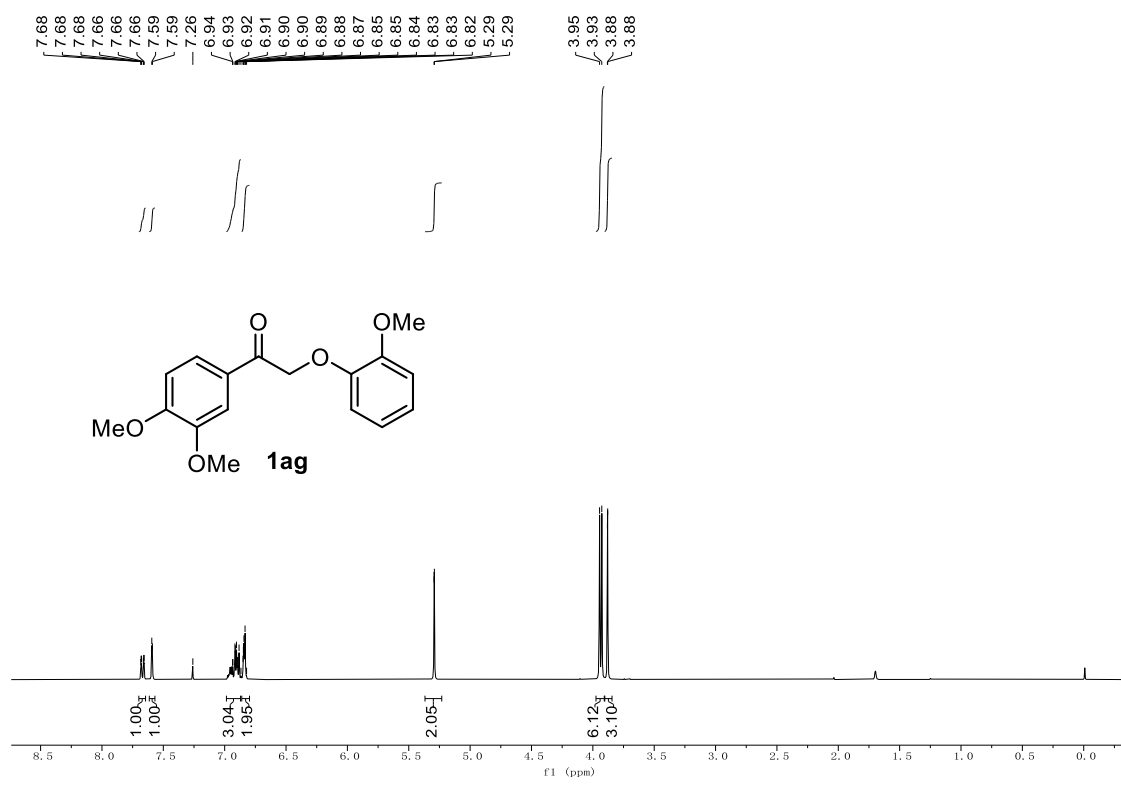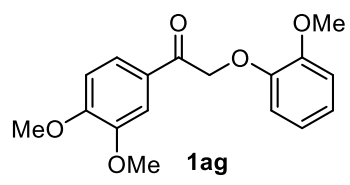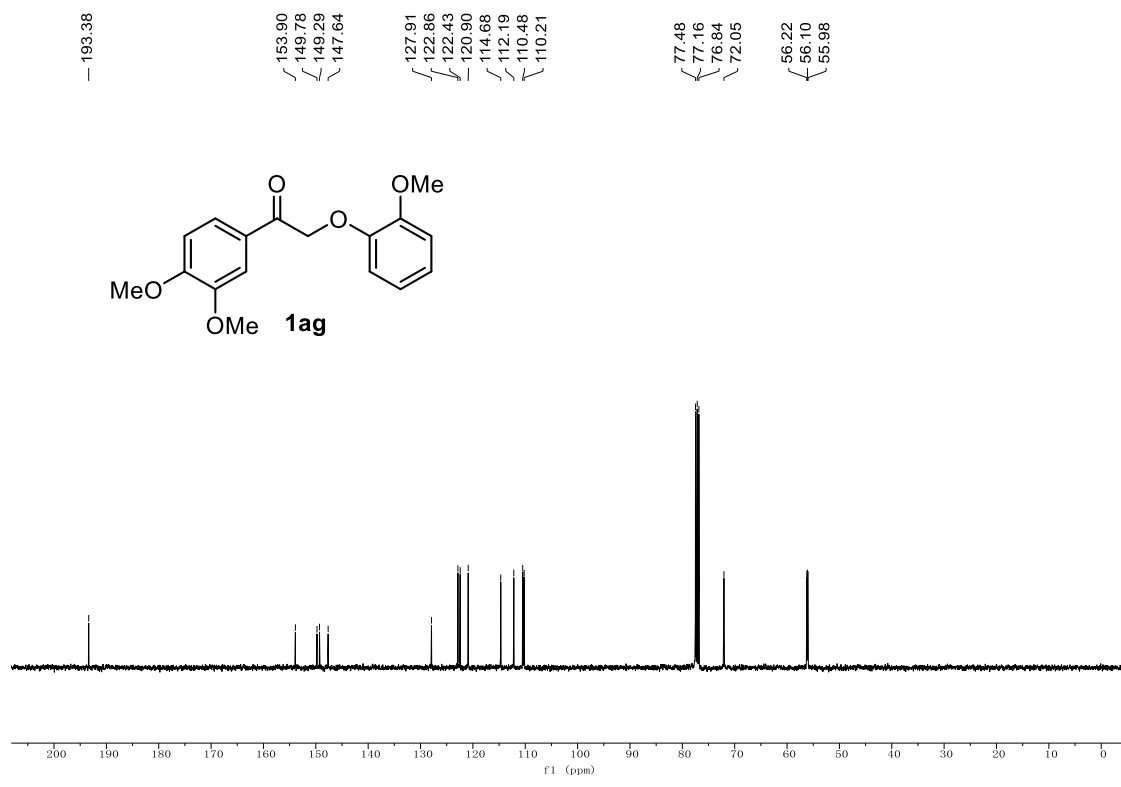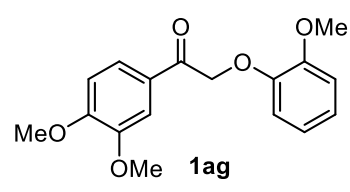

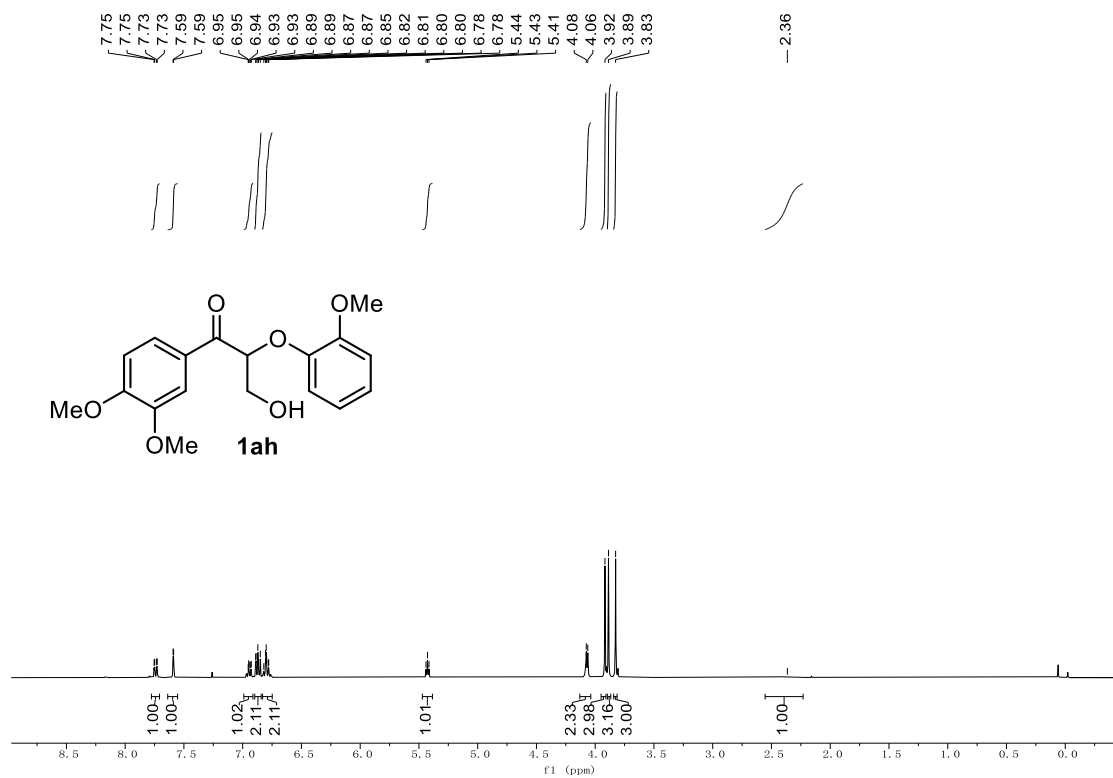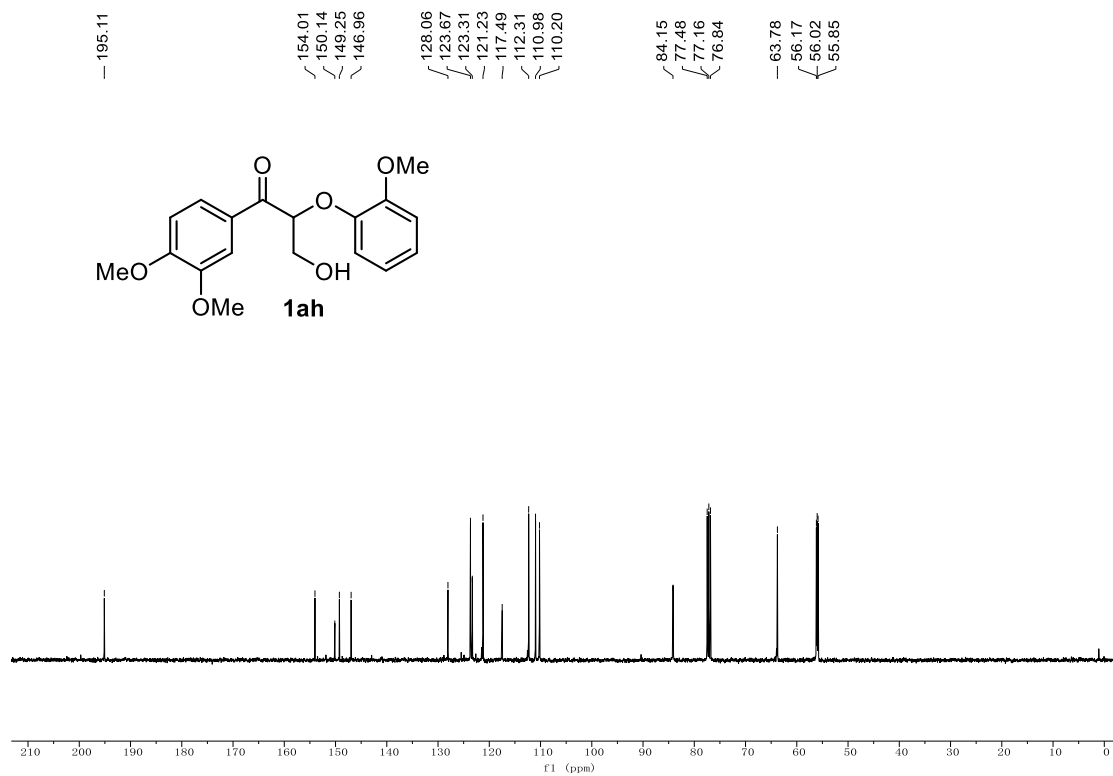



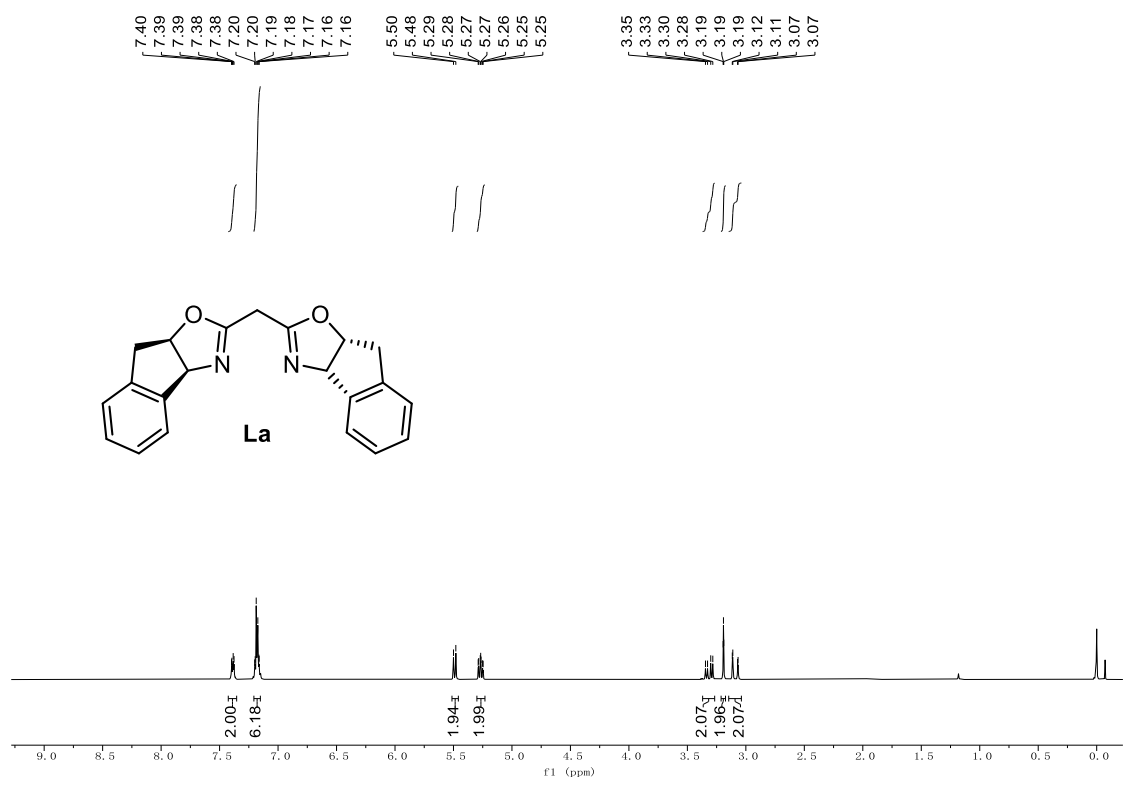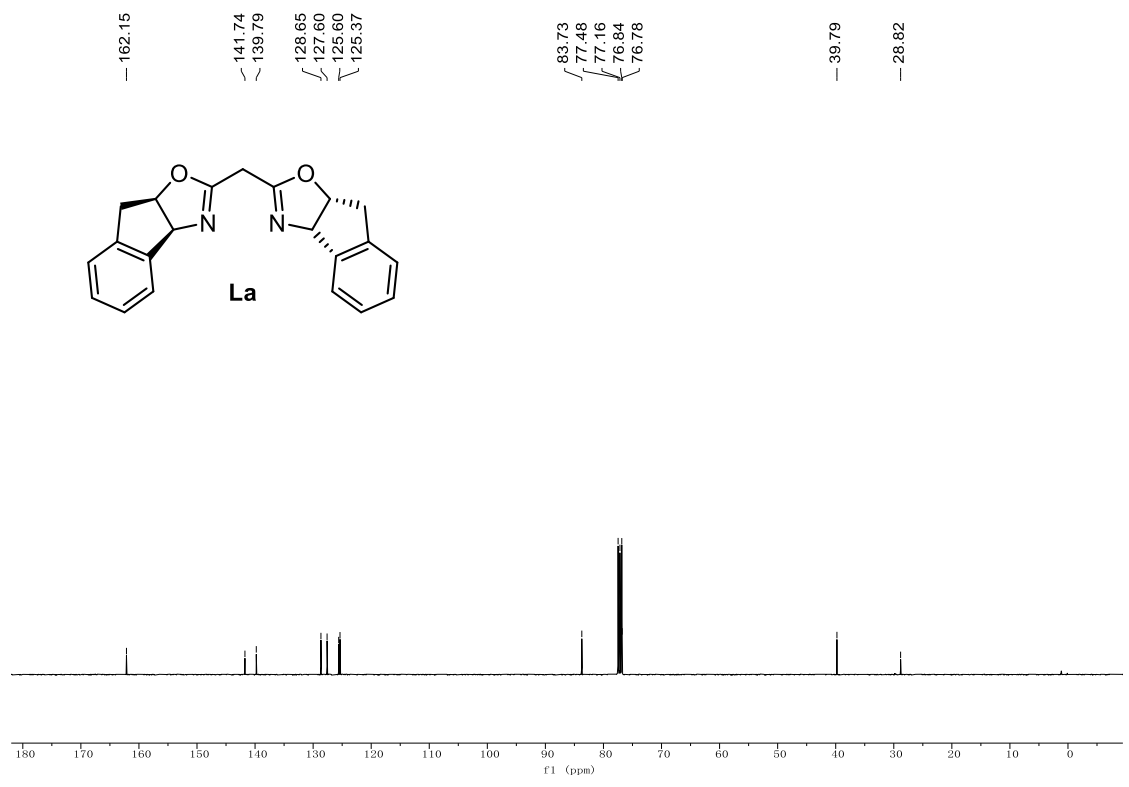

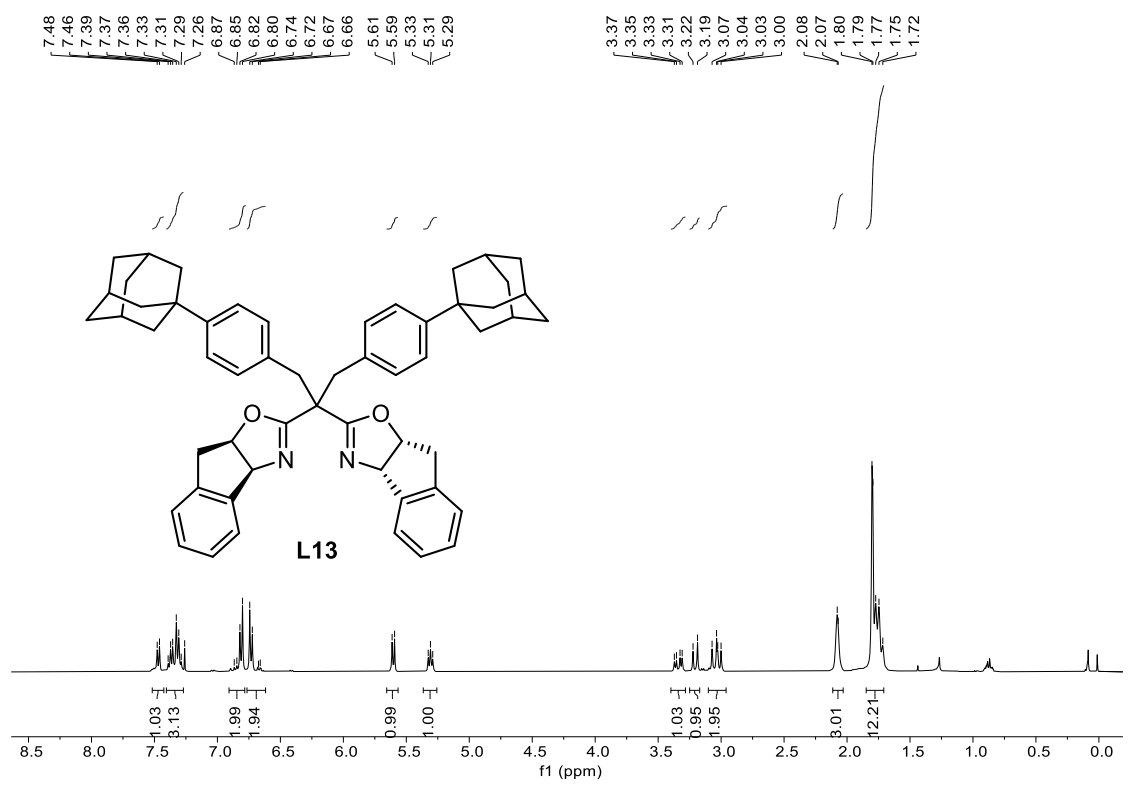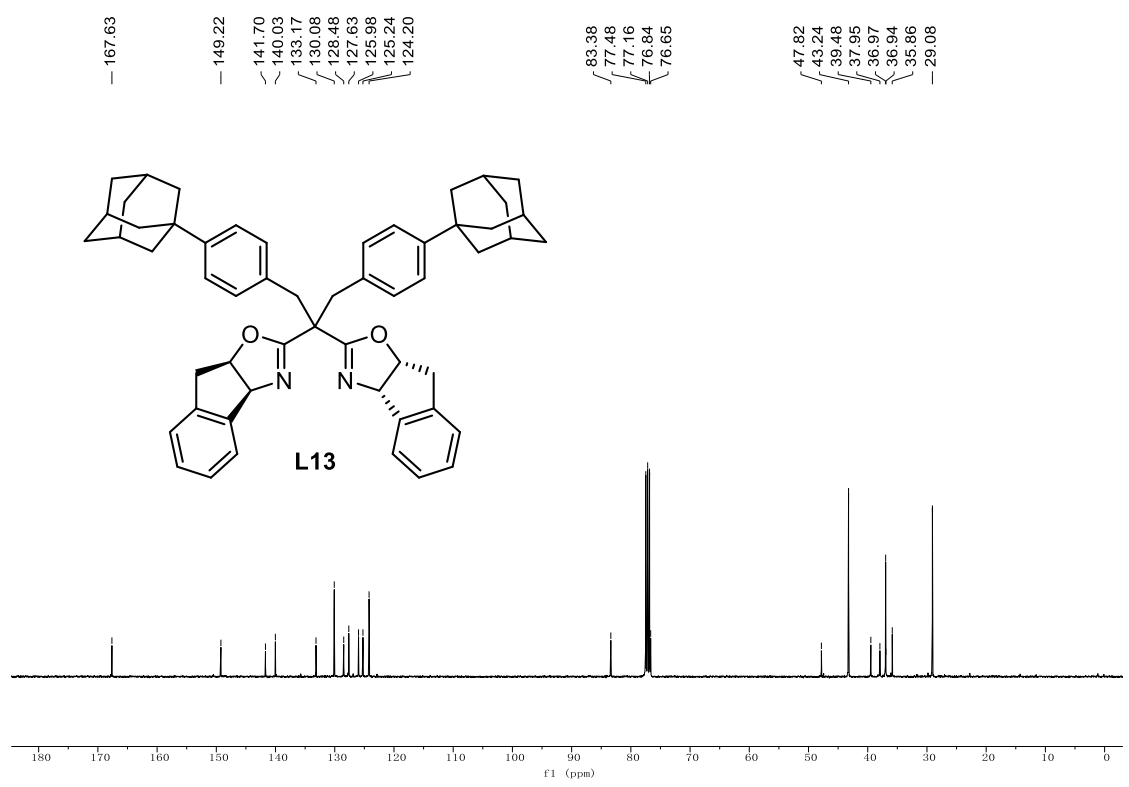

7.34  
7.32  
7.32  
7.31  
7.30  
7.26  
7.25  
7.23  
7.19  
7.18  
7.18  
7.17  
7.17  
7.17  
4.38  
4.37  
4.37  
4.36  
4.34  
4.34  
4.31  
4.31  
4.31  
2.84  
2.79  
2.78  
2.78  
2.77  
2.76  
2.75  
2.75  
2.13  
2.13  
2.12  
2.12  
2.11  
2.11  
2.09  
2.08  
2.07  
2.06  
2.06  
2.06  
2.05  
2.05  
2.04  
2.04  
2.02  
2.02  
2.01  
2.01  
1.86  
1.86  
1.85  
1.85  
1.83  
1.82

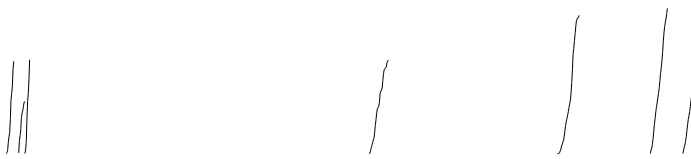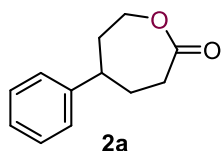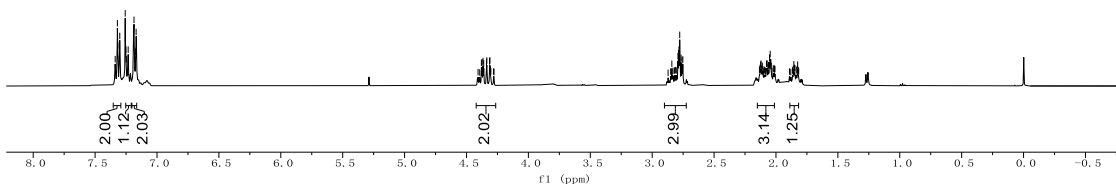

174.78  
144.07  
127.88  
125.98  
125.72  
76.48  
76.16  
75.84  
67.35  
46.36  
35.87  
32.82  
29.45

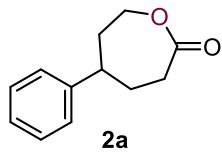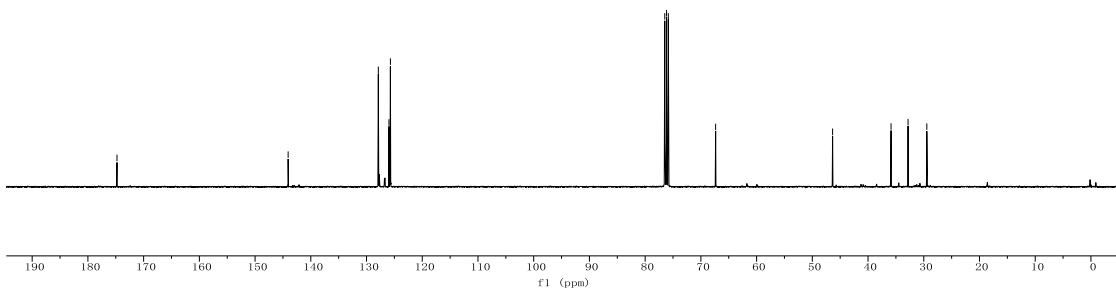

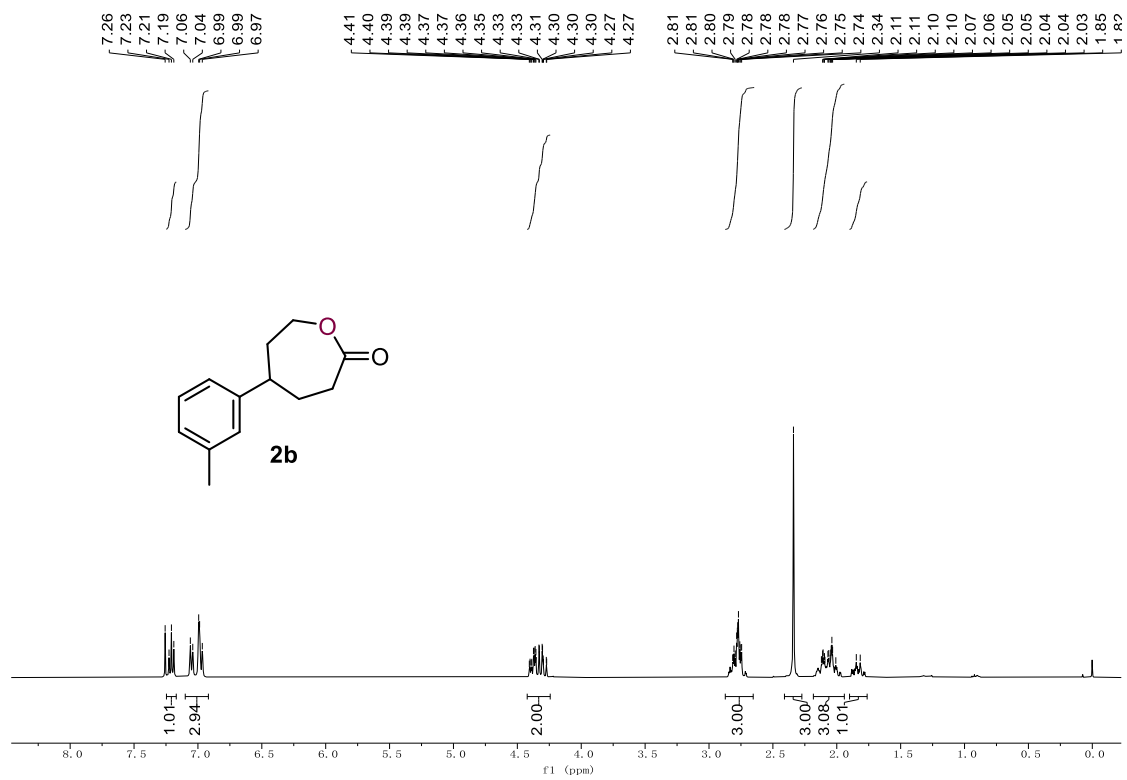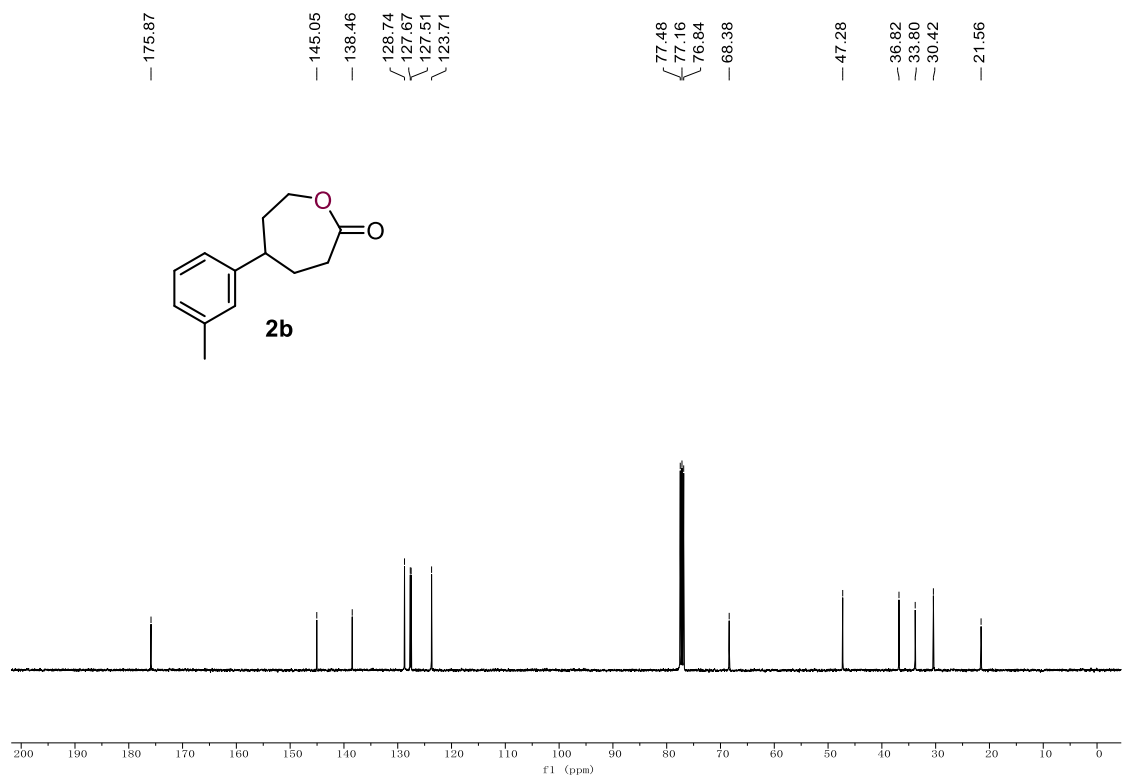

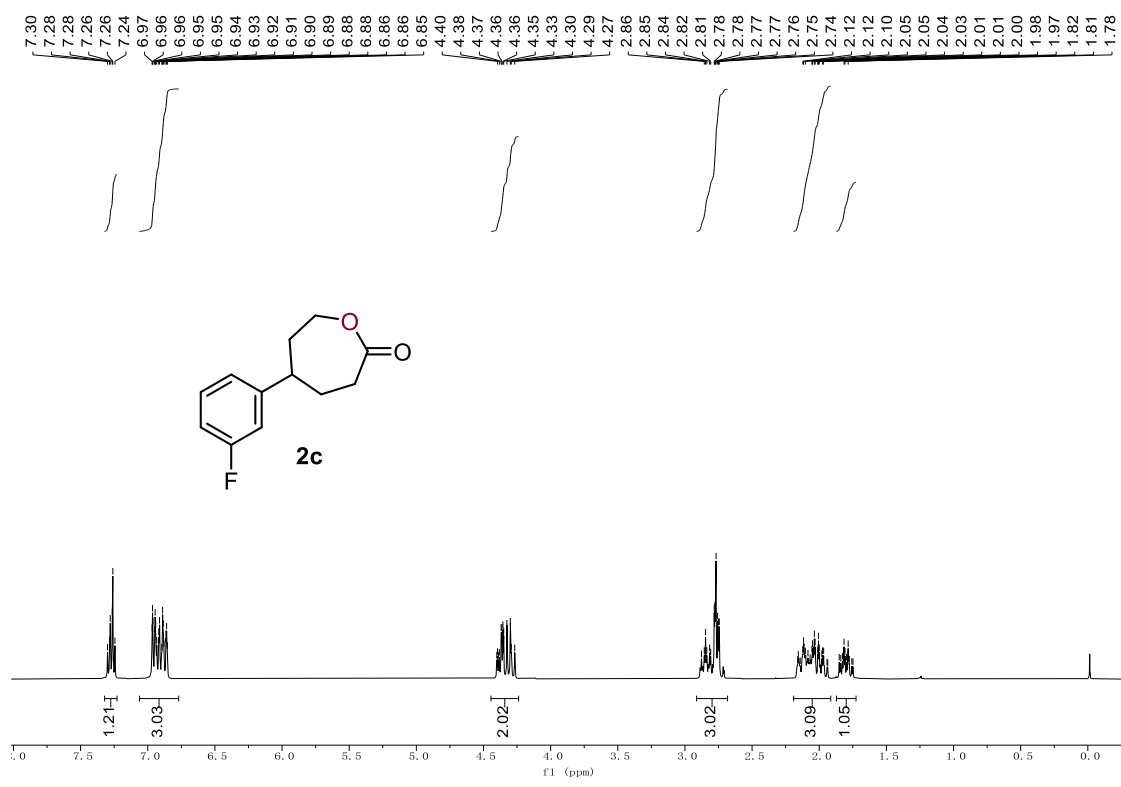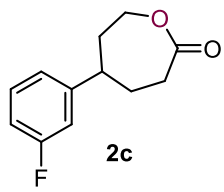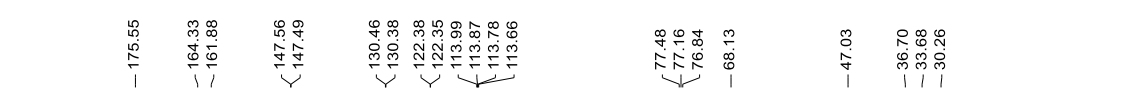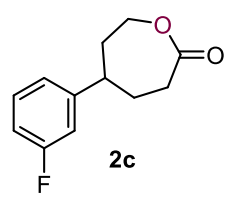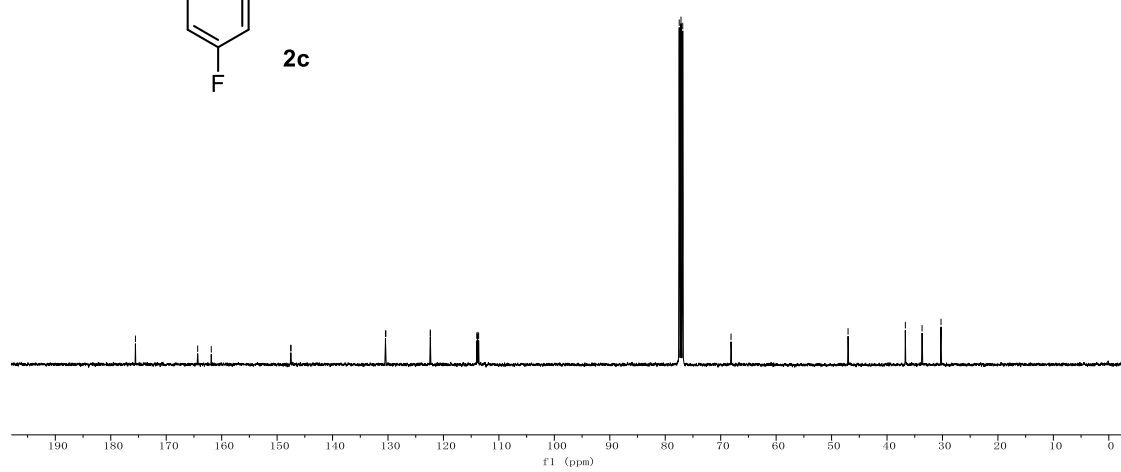

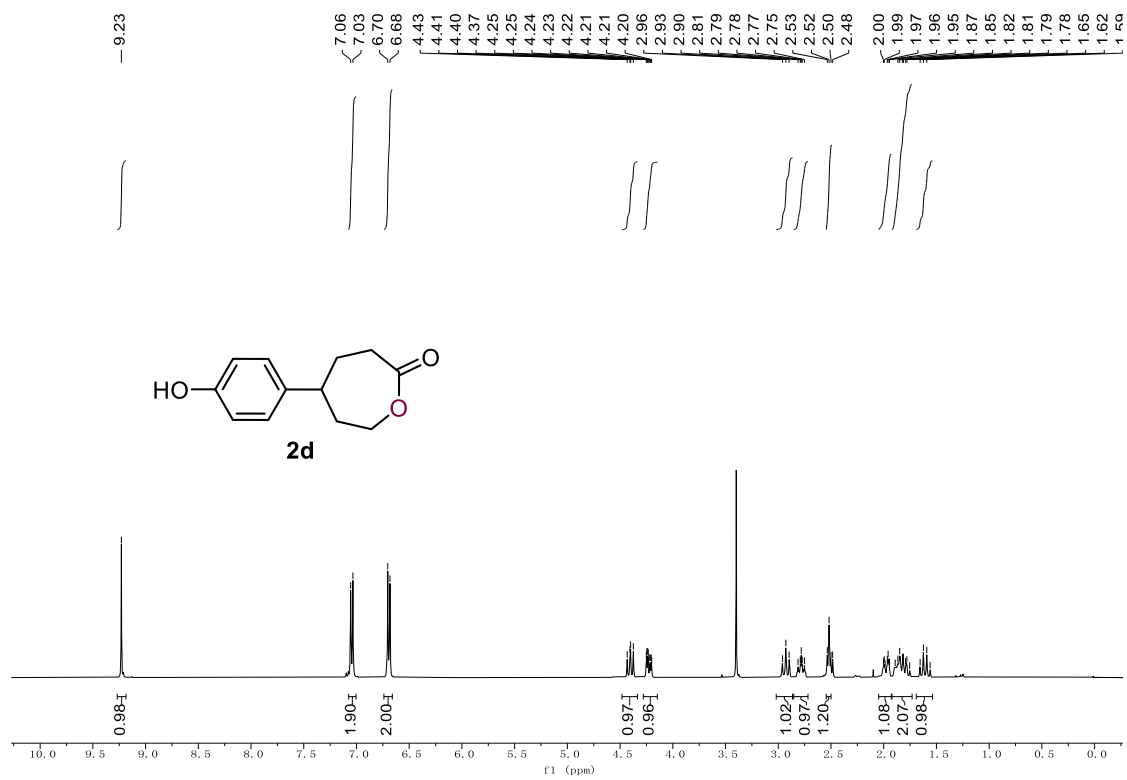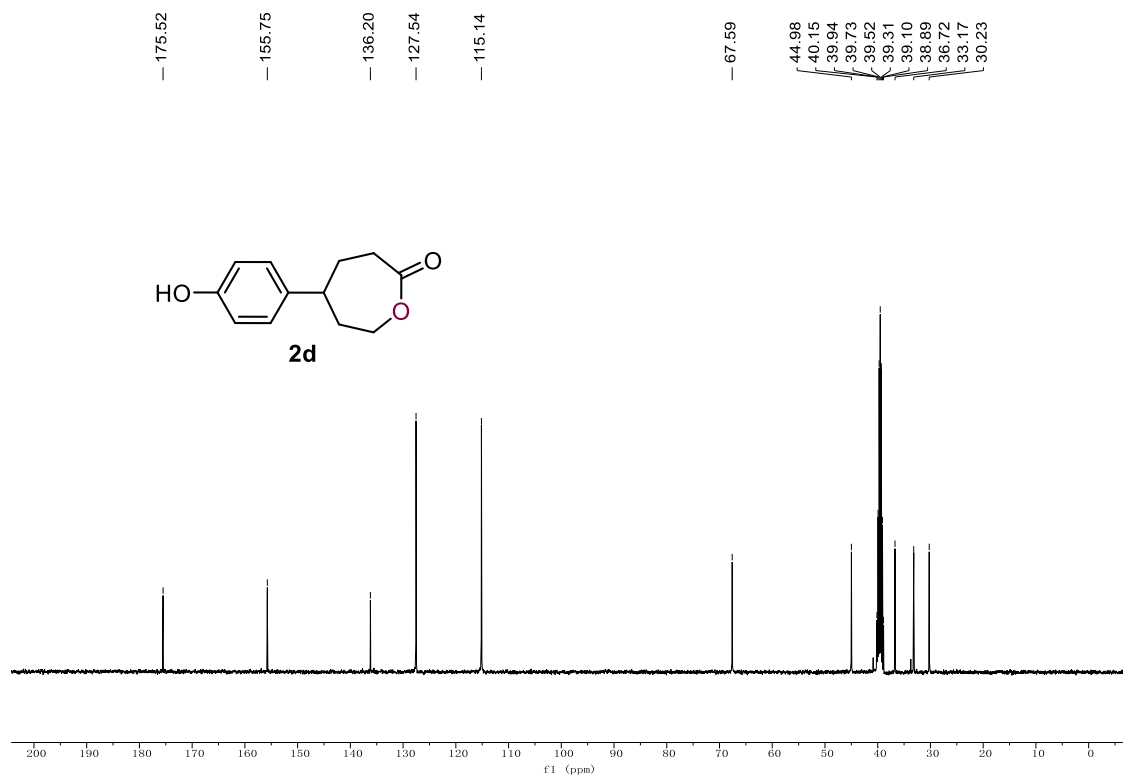

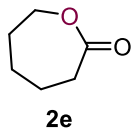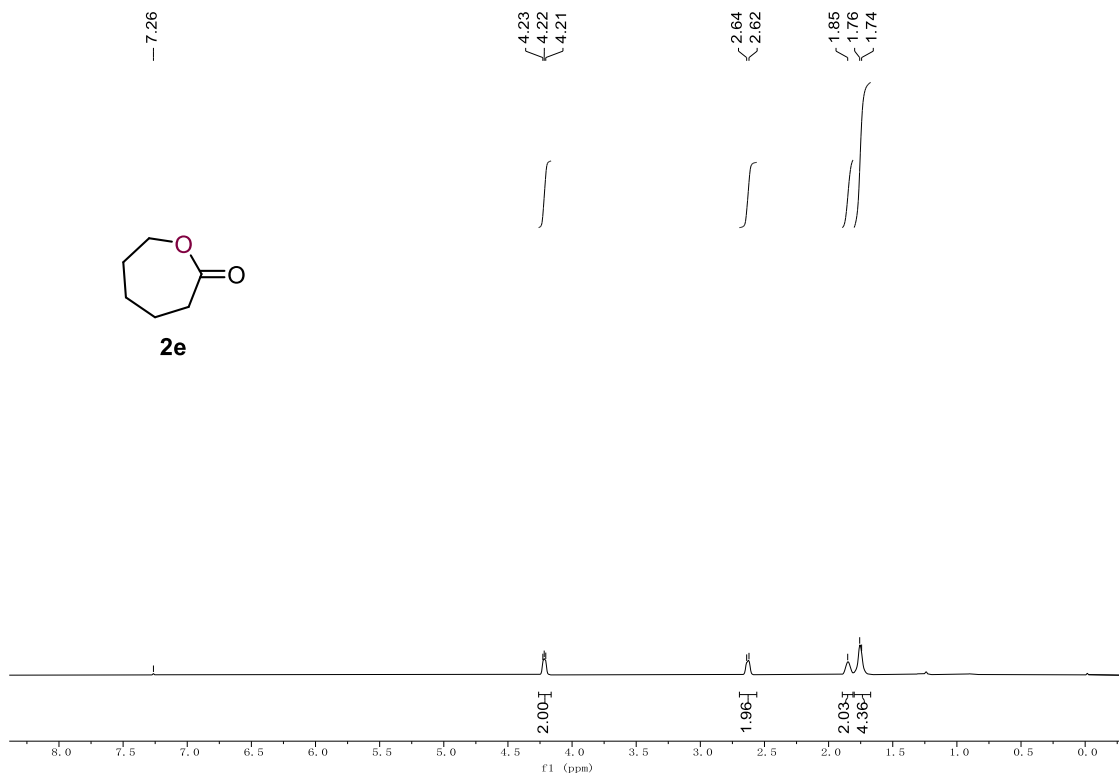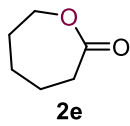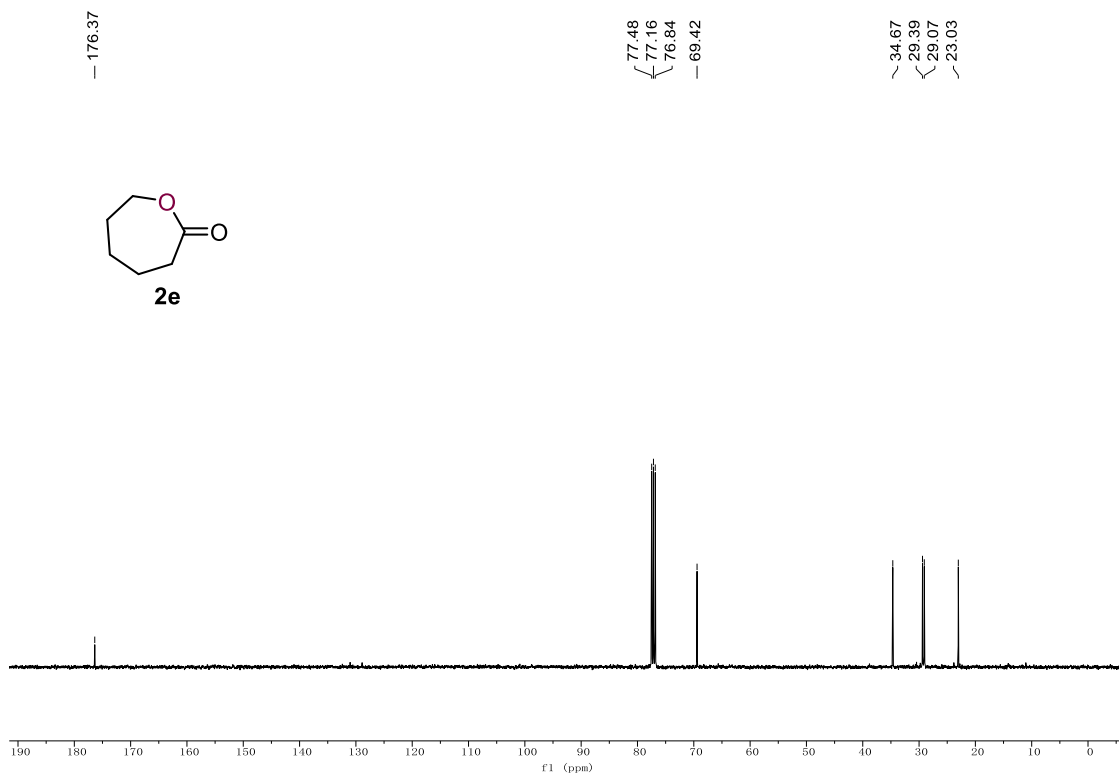

7.26  
4.27  
4.25  
4.24  
4.24  
4.23  
4.23  
4.22  
4.18  
4.15  
4.15  
4.12  
2.63  
2.63  
2.62  
2.62  
2.61  
2.61  
2.61  
2.60  
2.59  
2.58  
1.92  
1.90  
1.89  
1.88  
1.88  
1.87  
1.87  
1.86  
1.85  
1.85  
1.85  
1.84  
1.84  
1.83  
1.83  
1.82  
1.82  
1.75  
1.74  
1.73  
1.51  
1.49  
1.48  
1.48  
1.45  
1.45  
1.32  
1.31  
1.31  
1.29  
1.28  
0.97  
0.96  
0.95

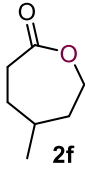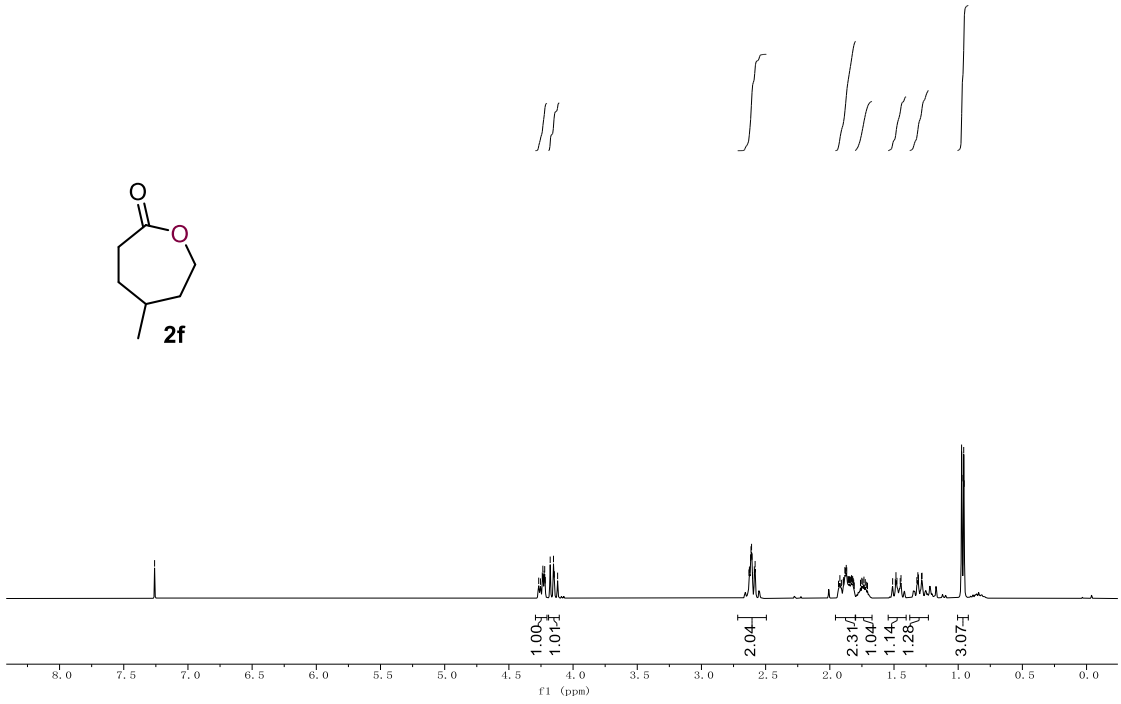

-176.21

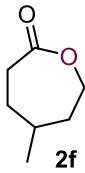

77.48  
77.16  
76.84  
-68.17

37.28  
35.30  
33.26  
30.82  
-22.18

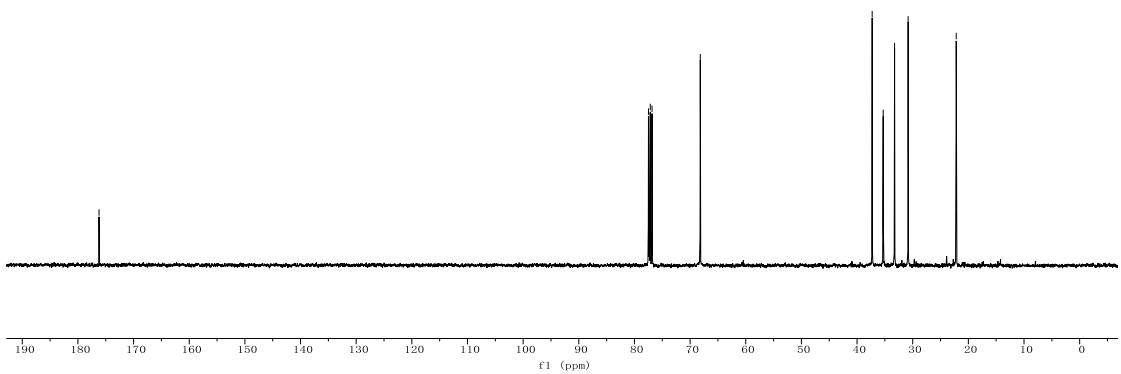



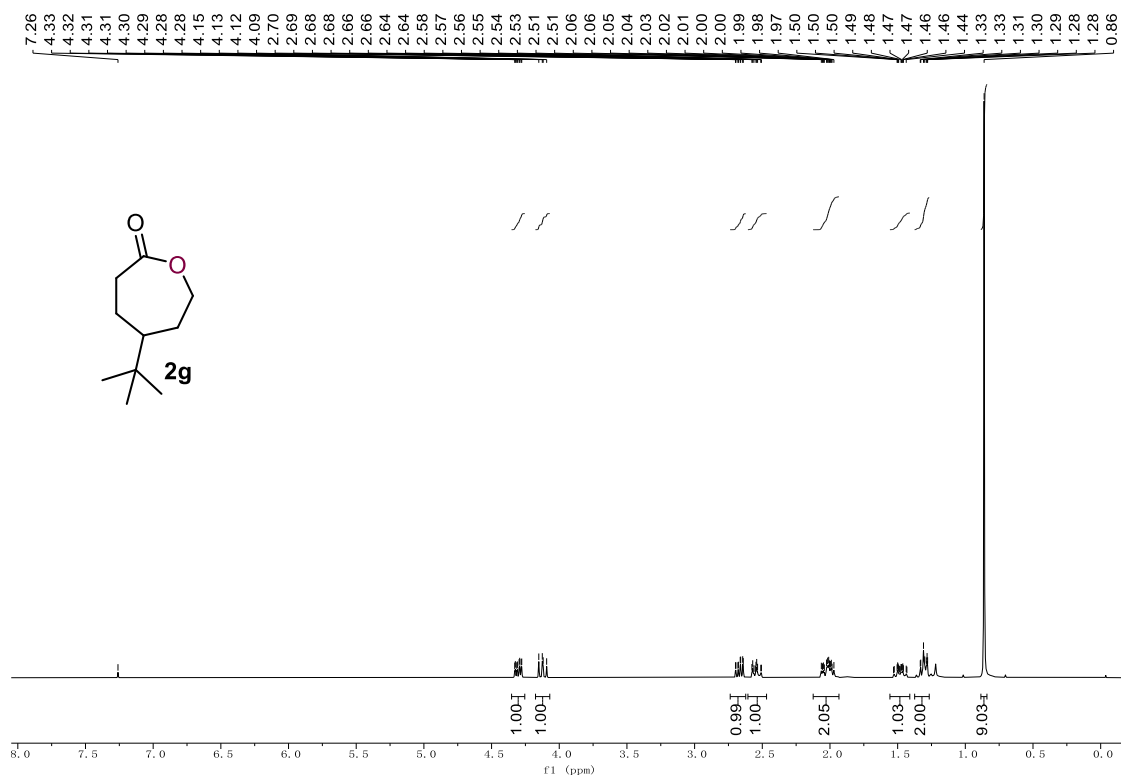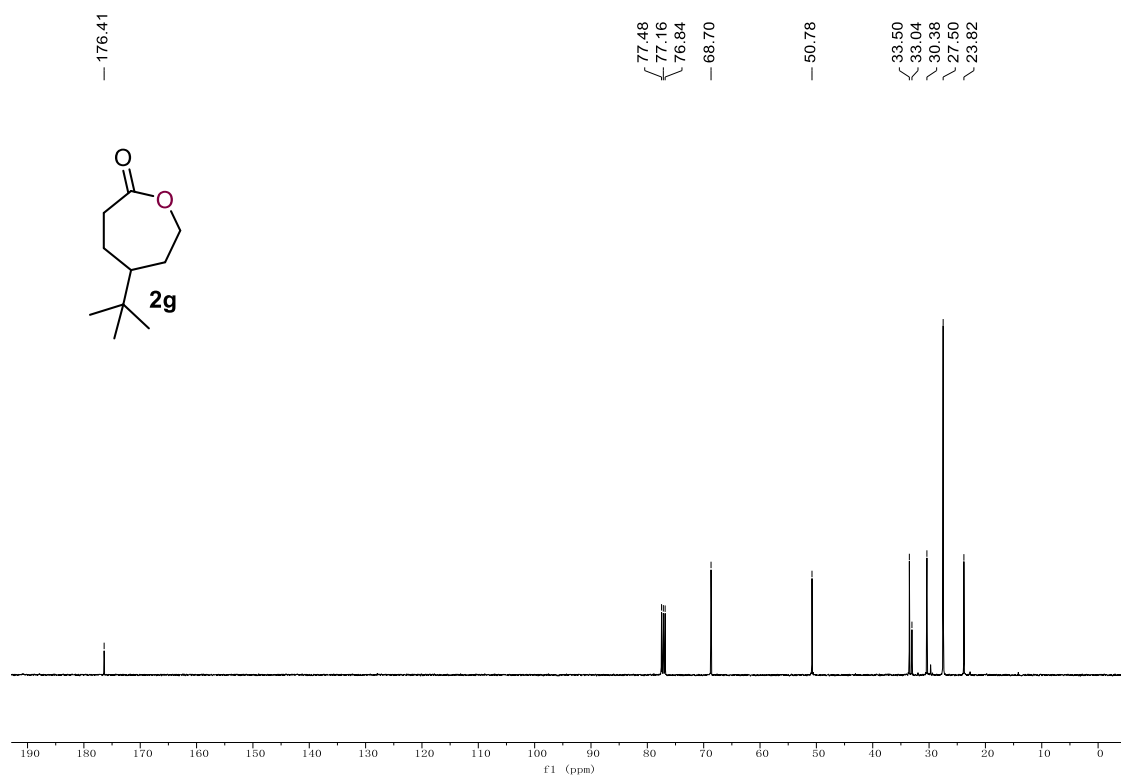

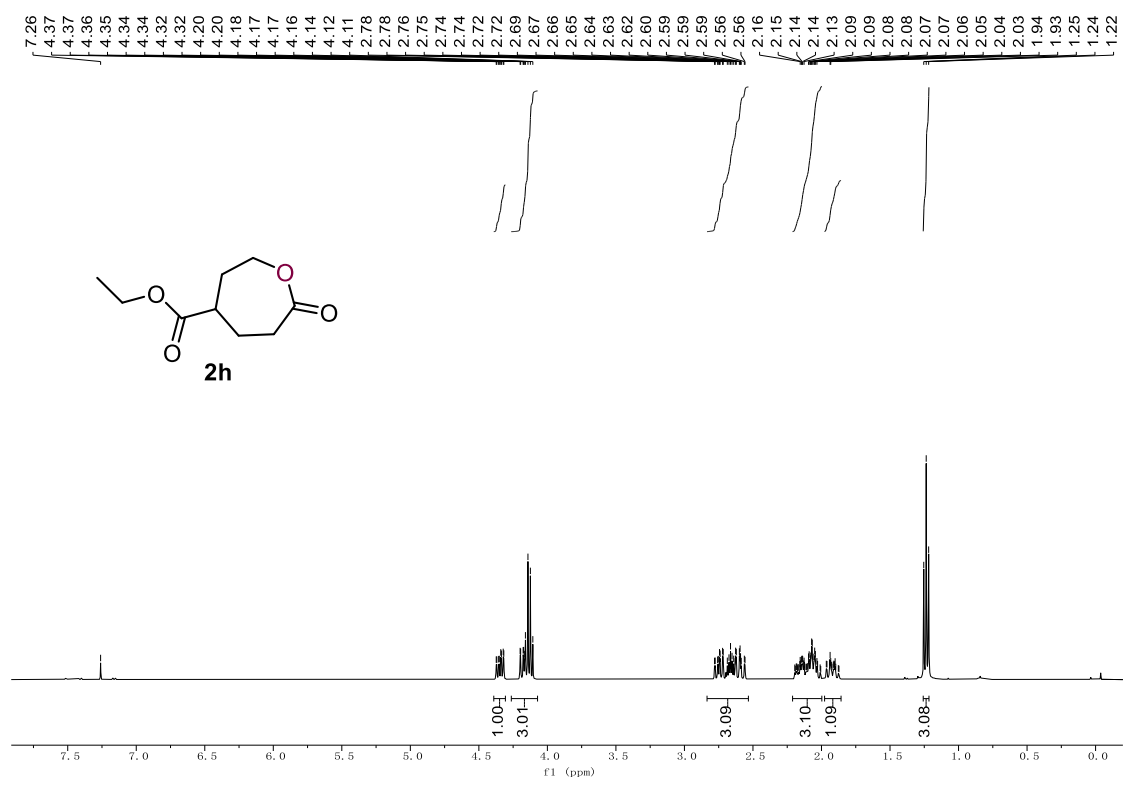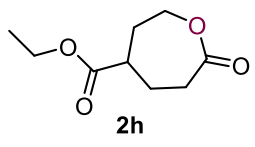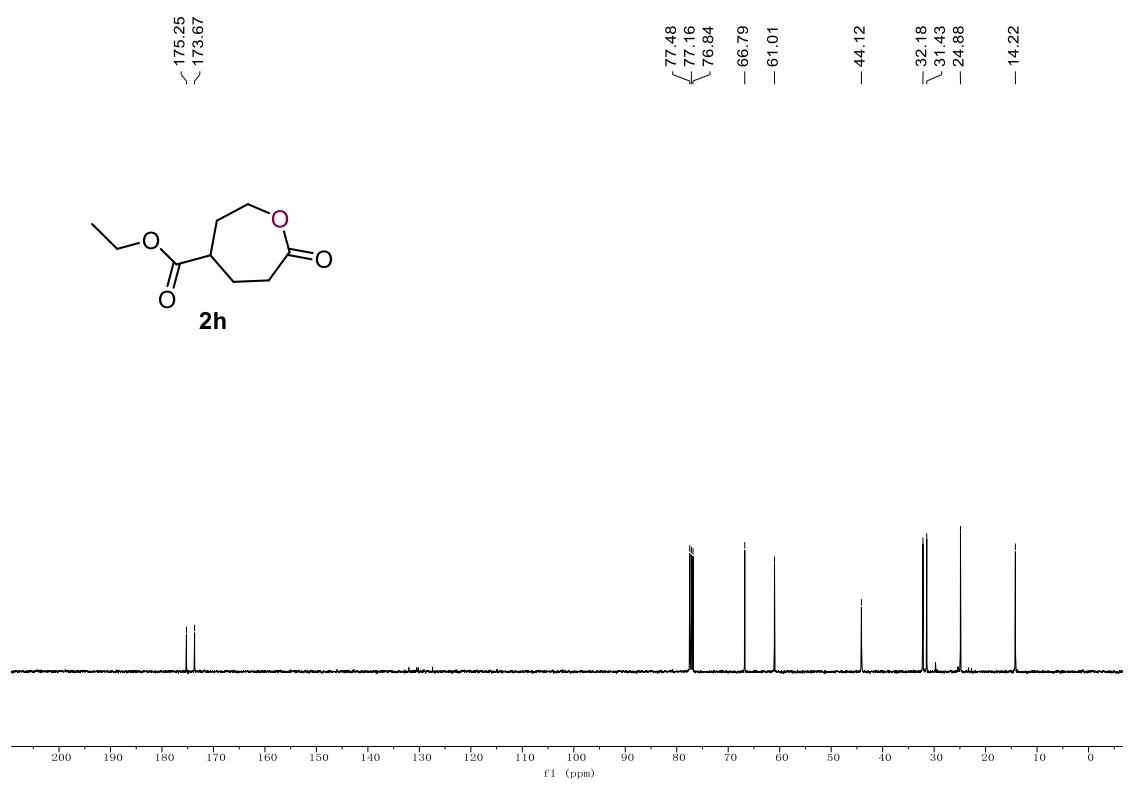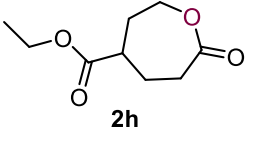

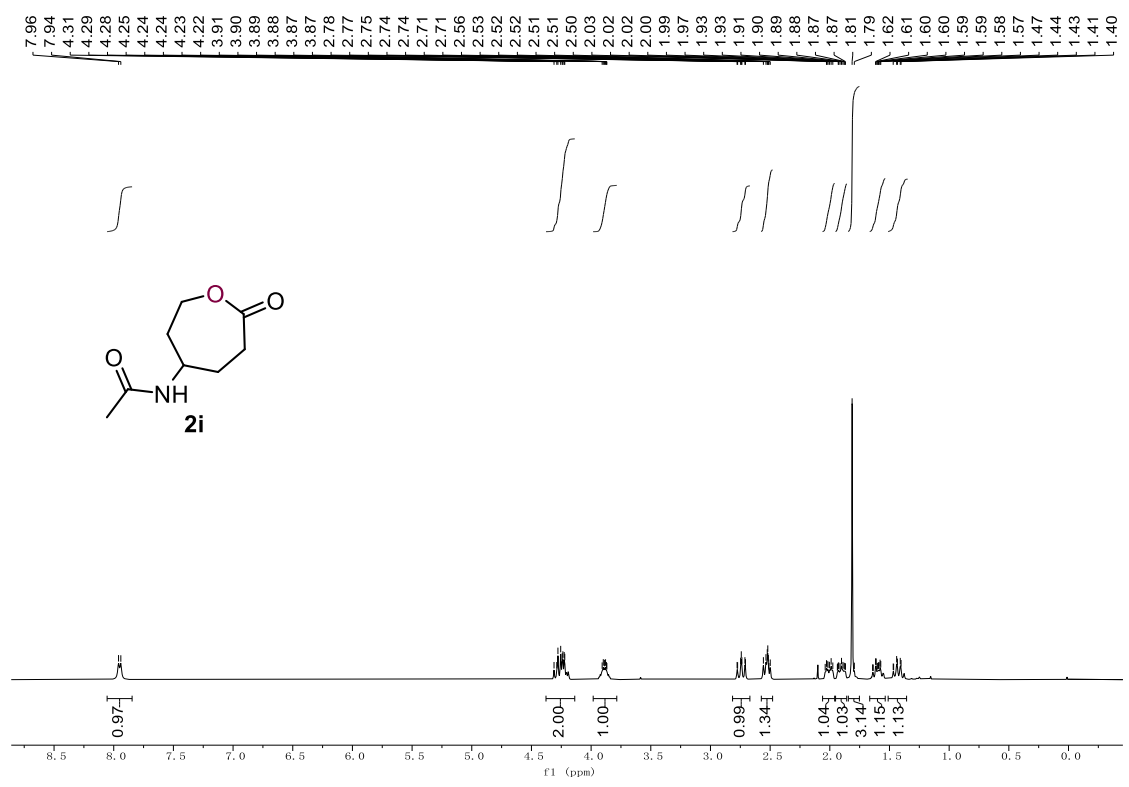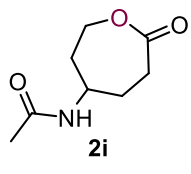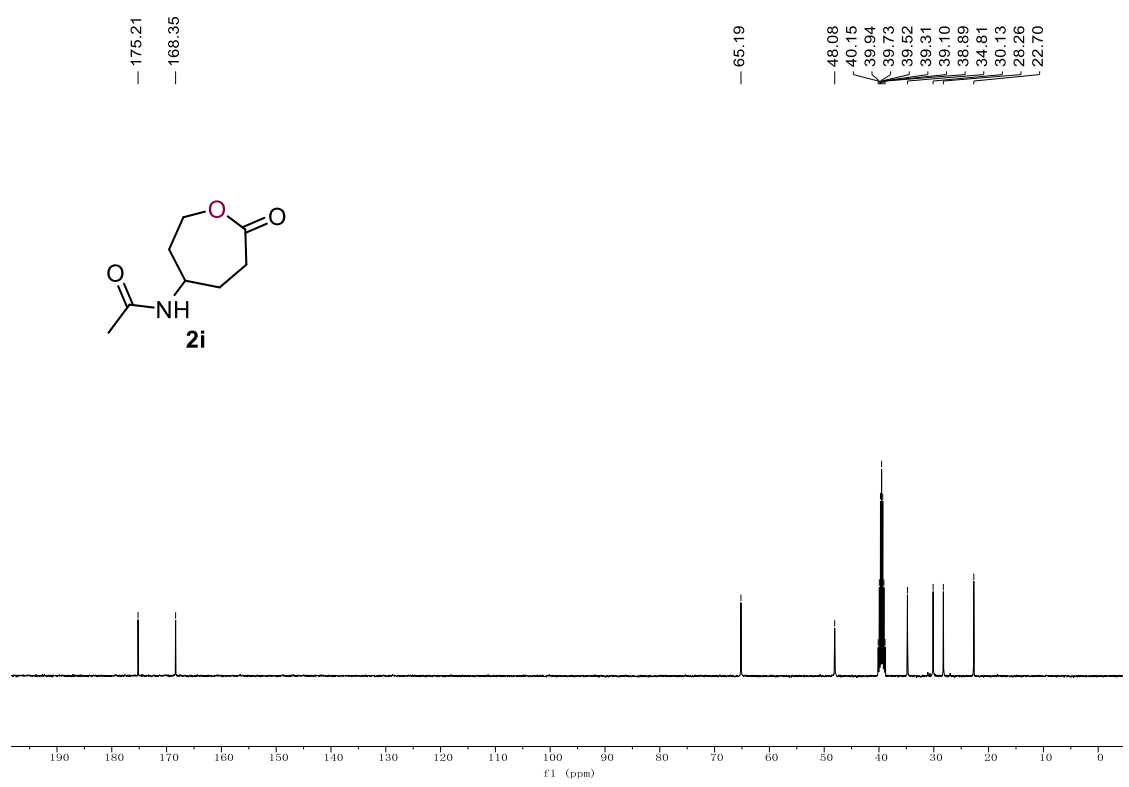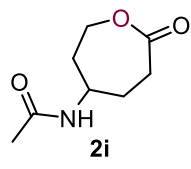

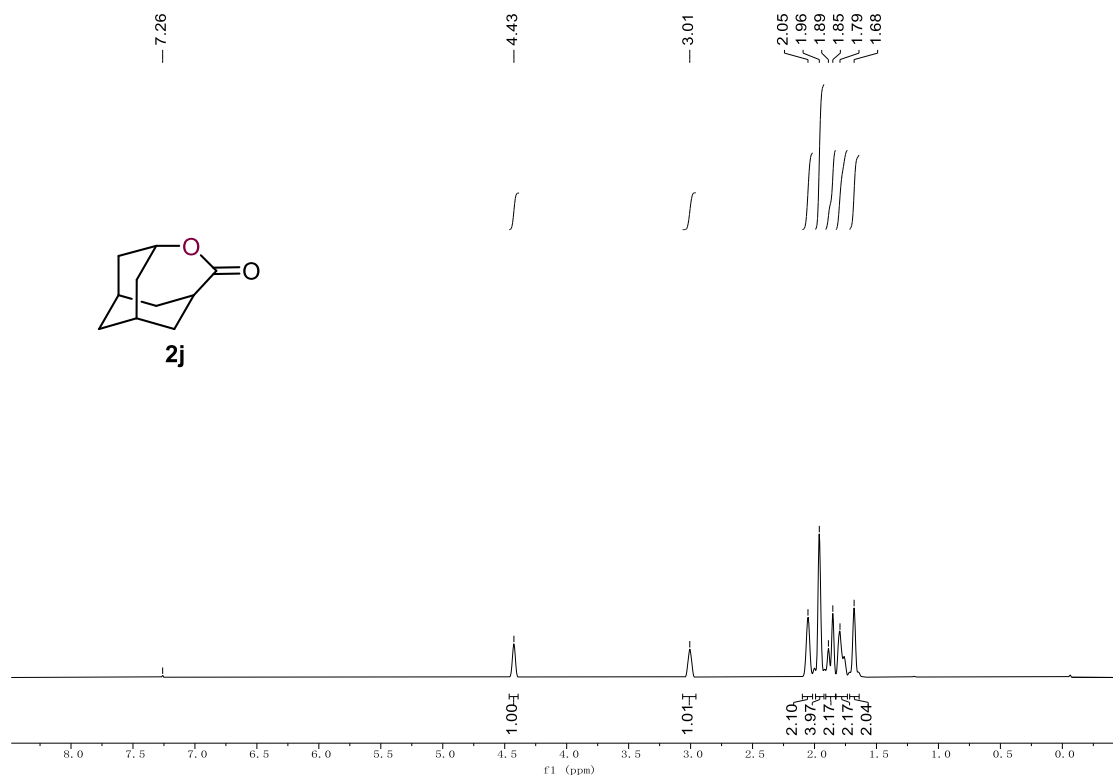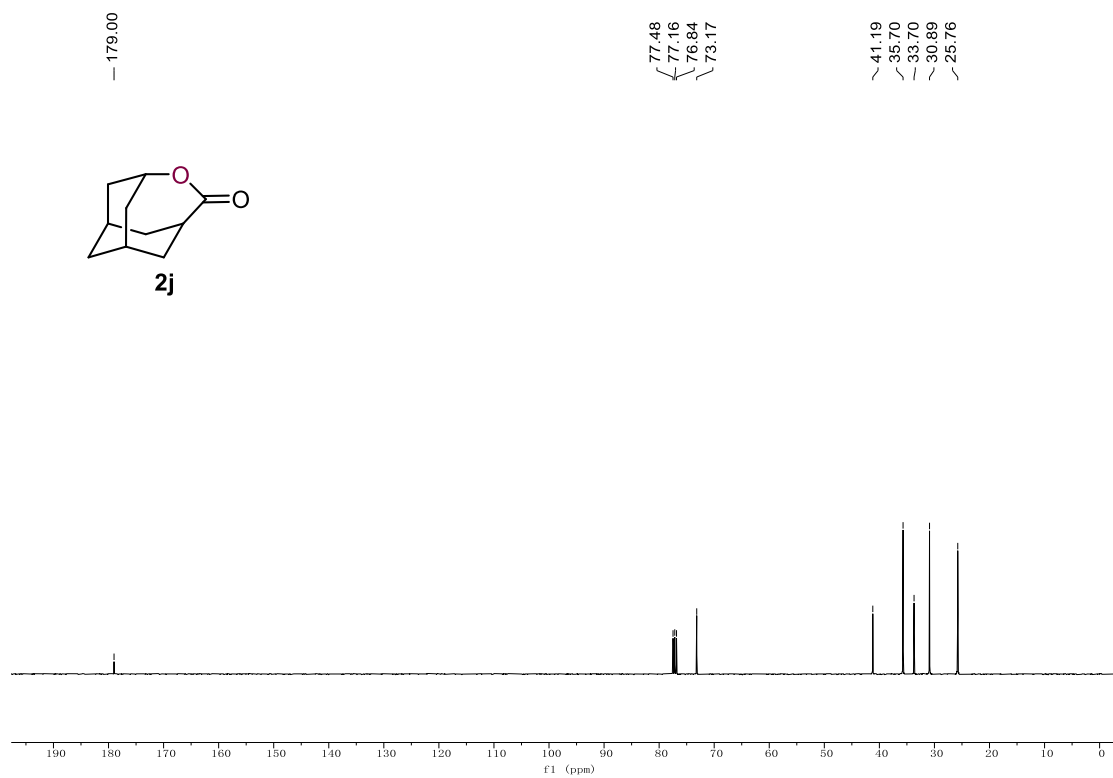

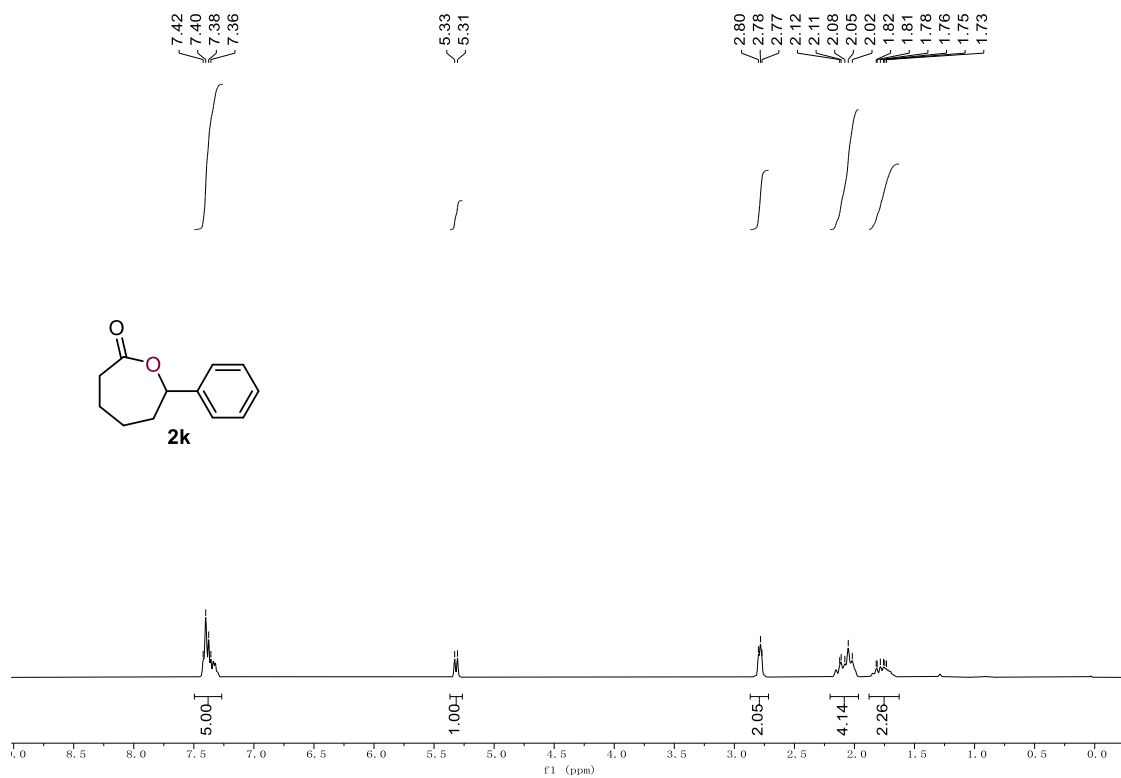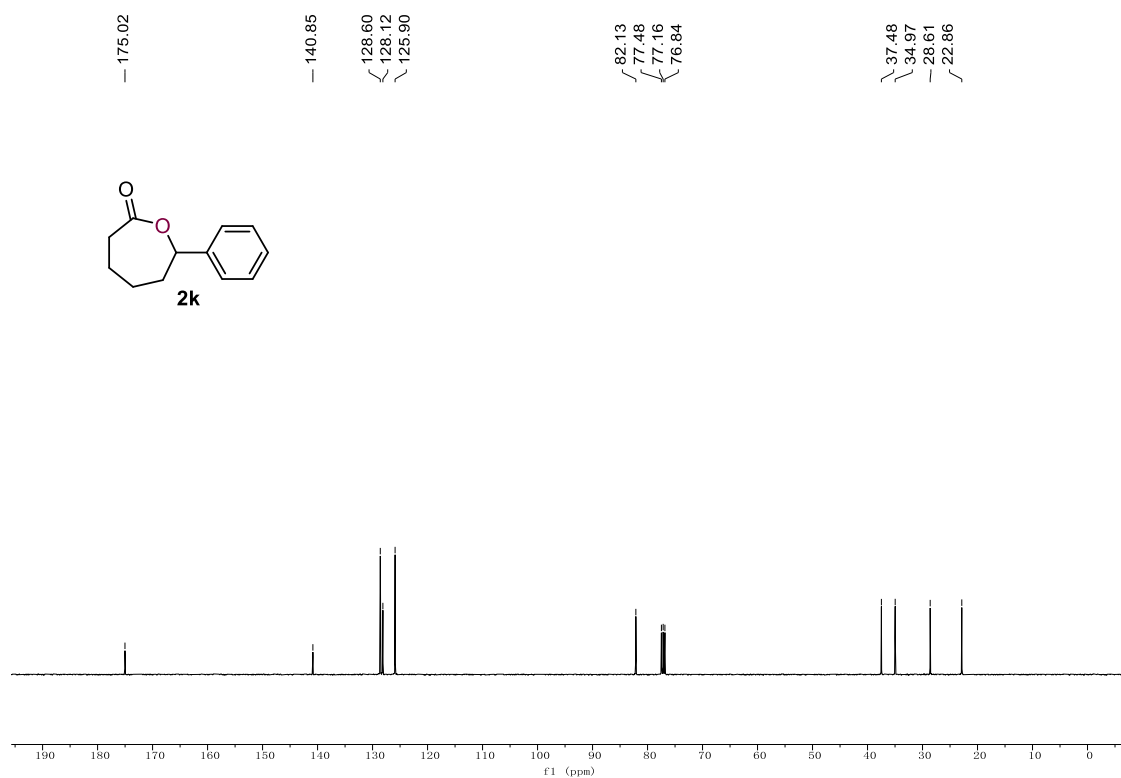

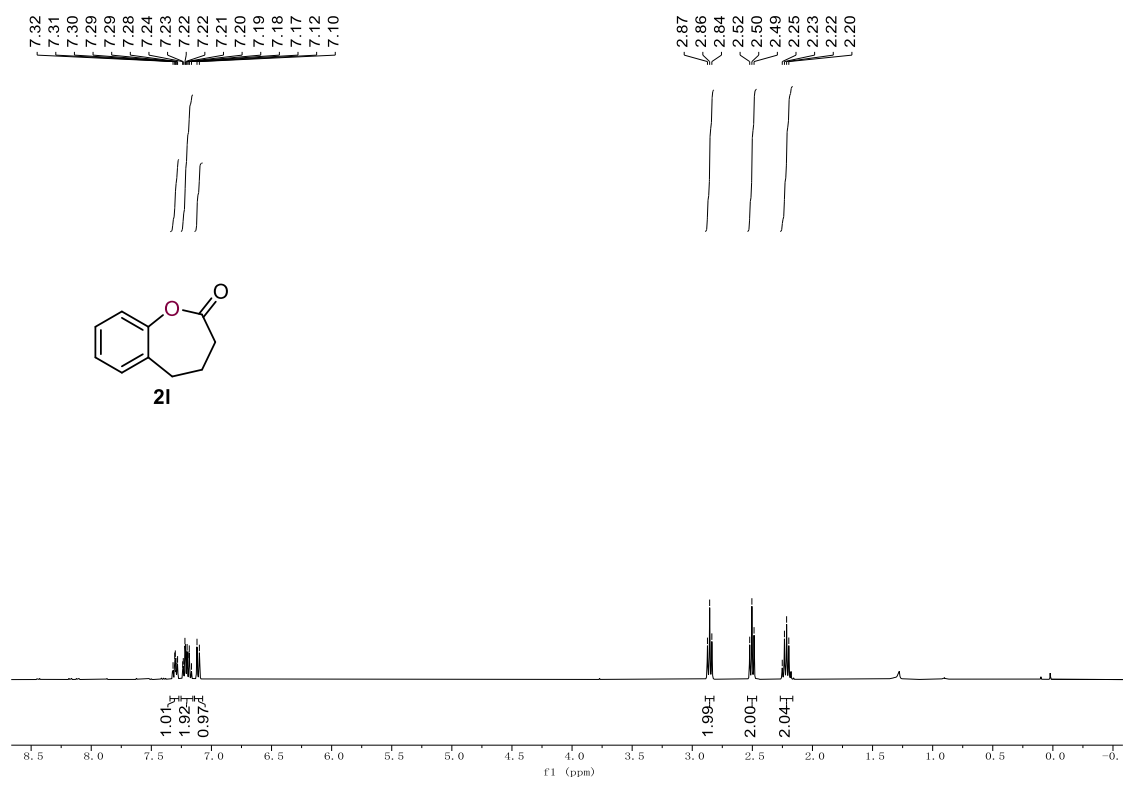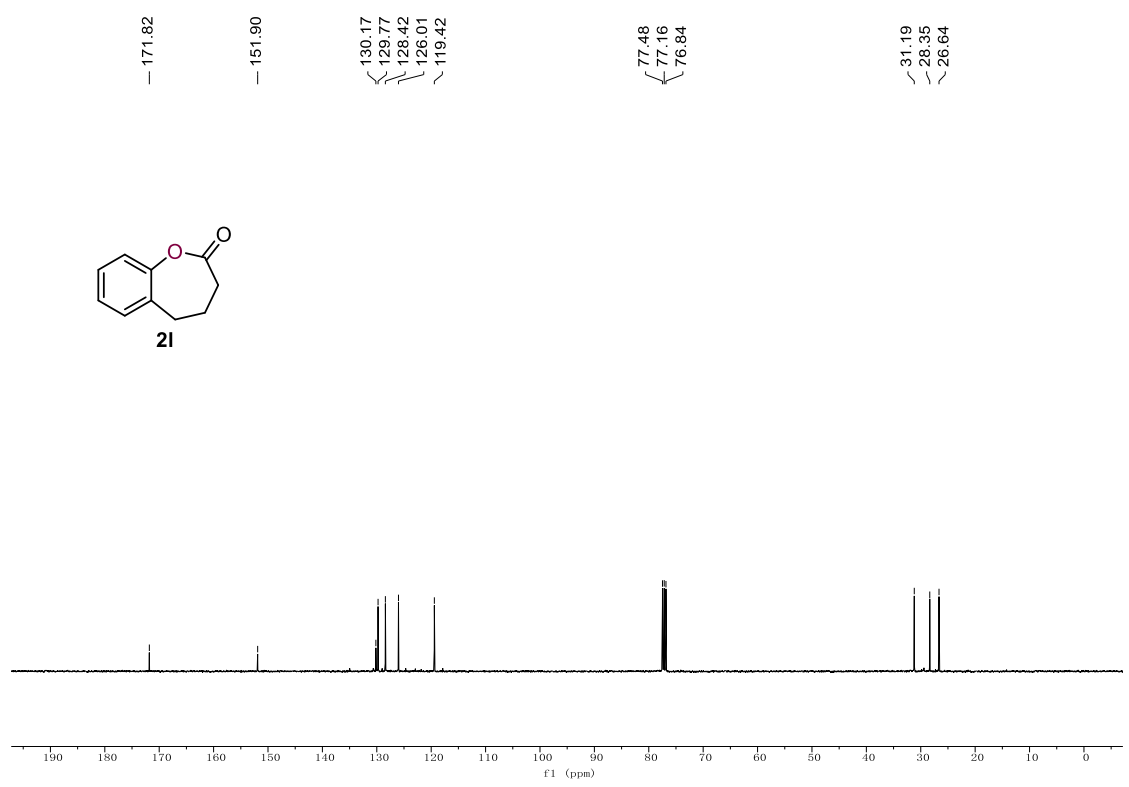

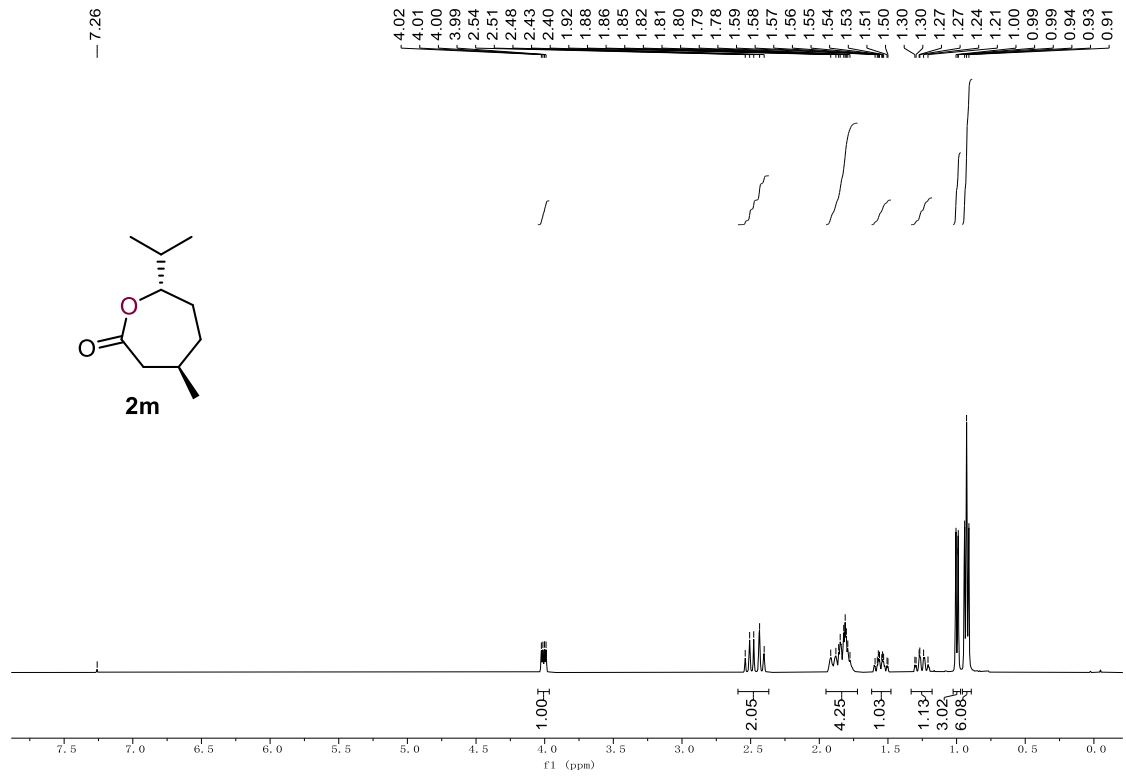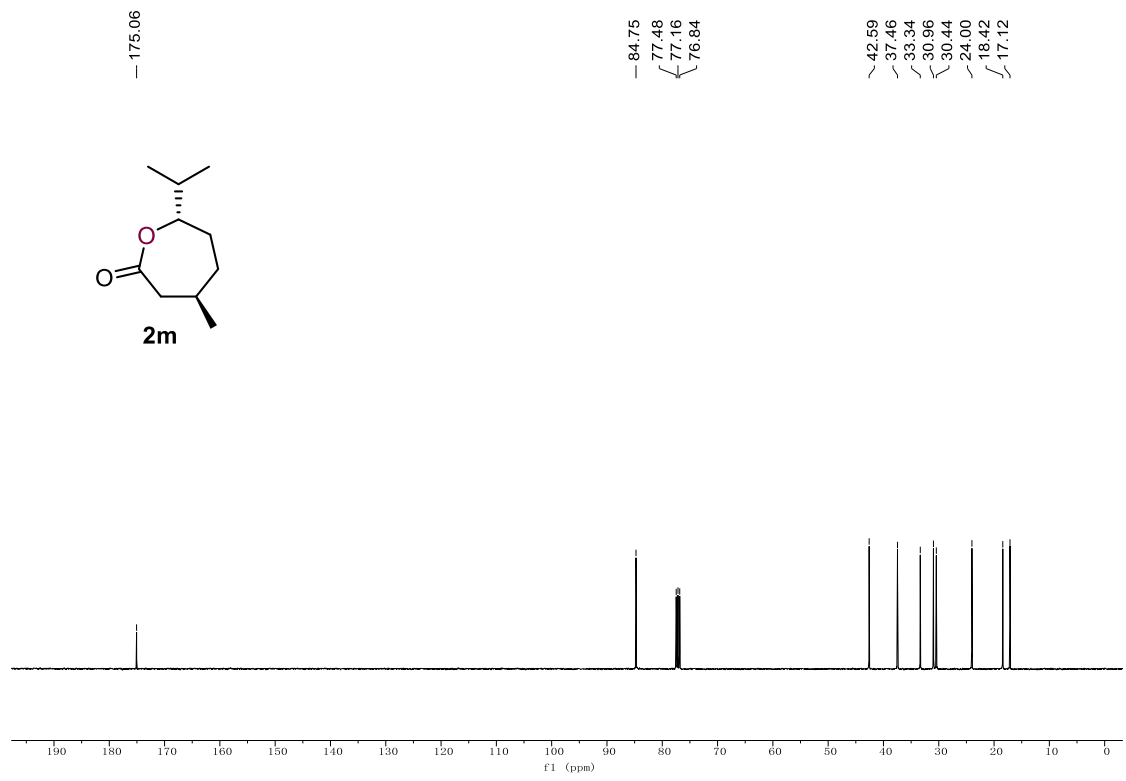

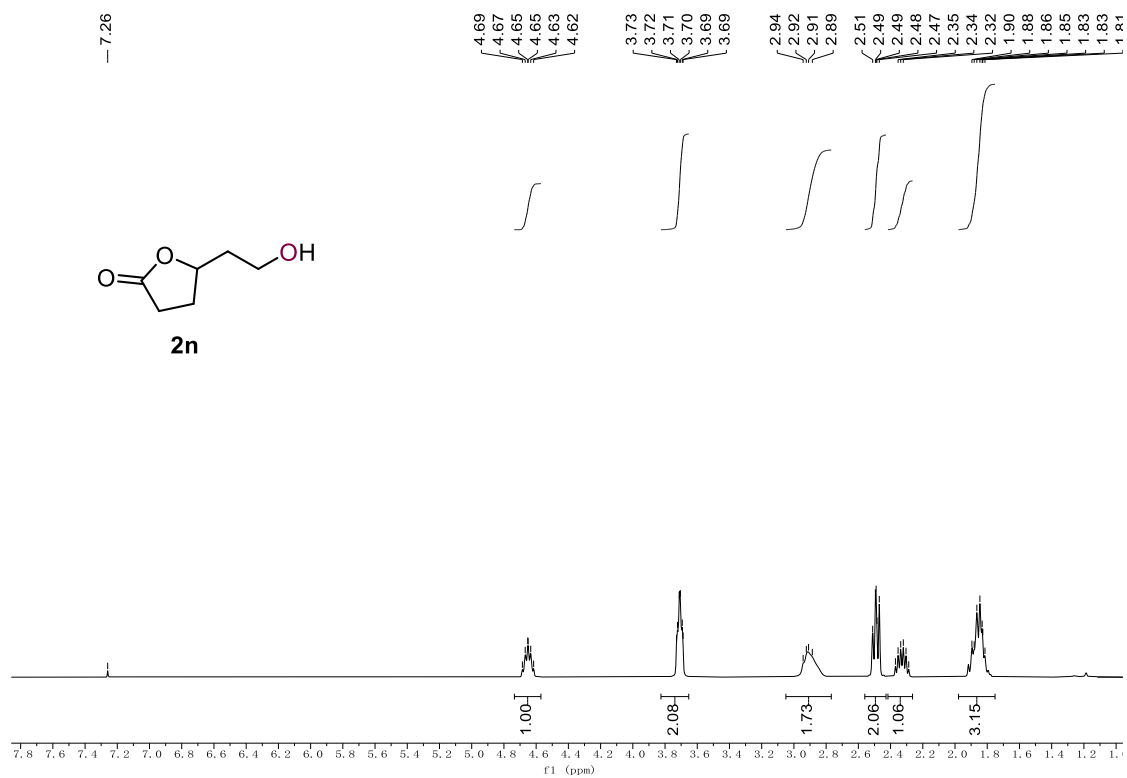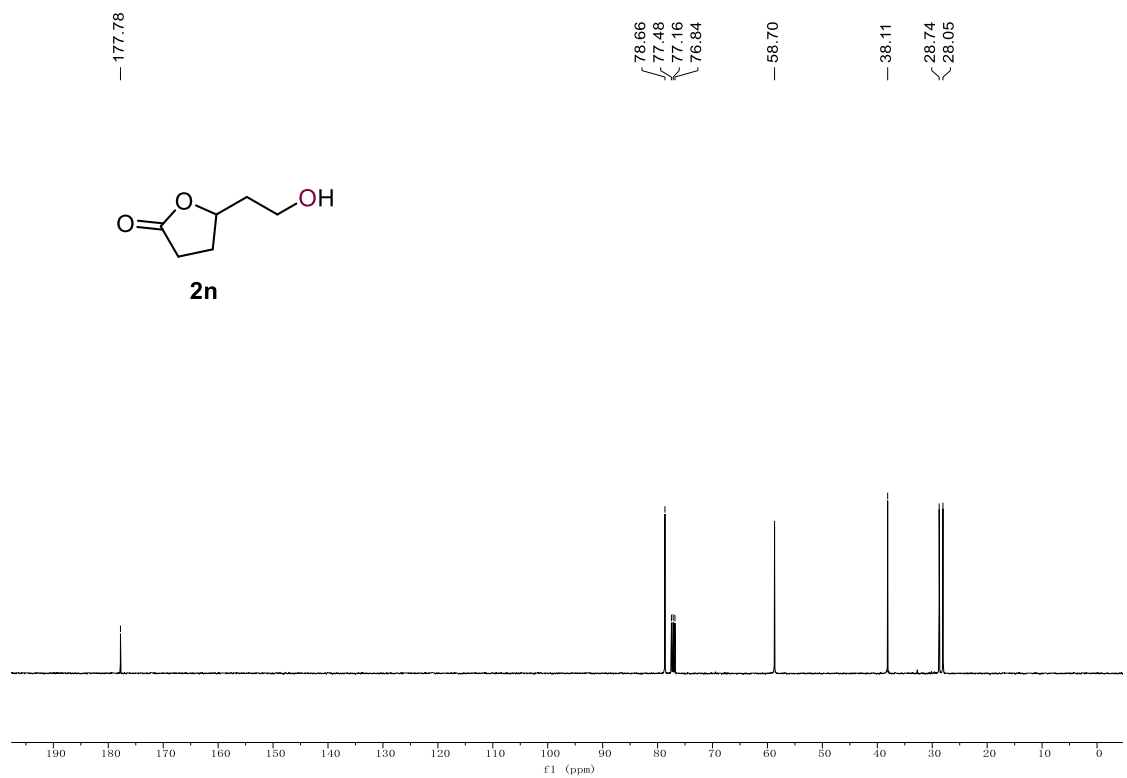



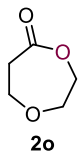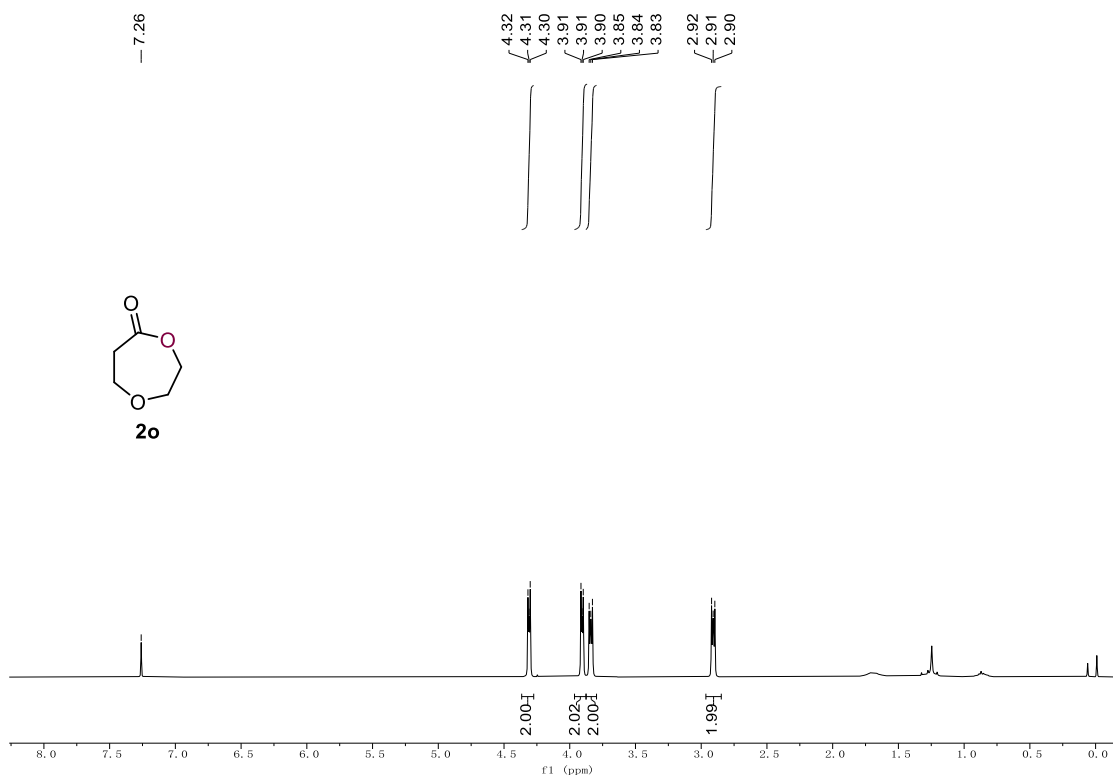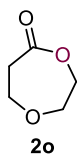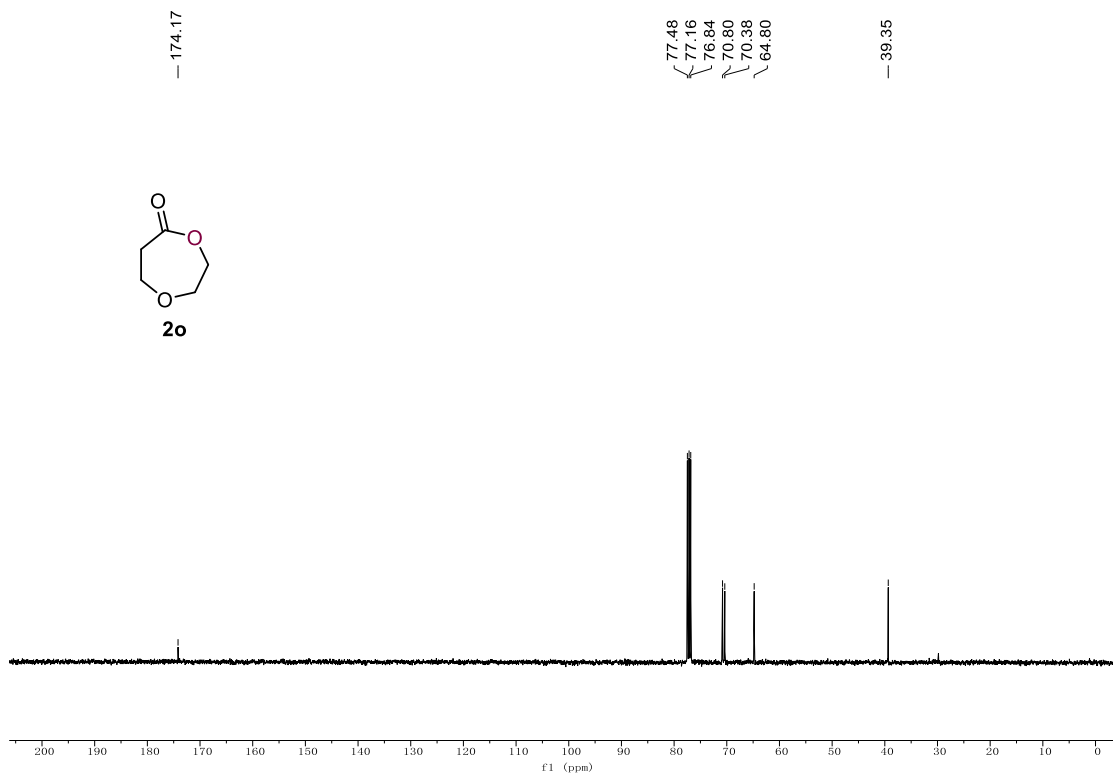

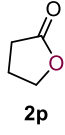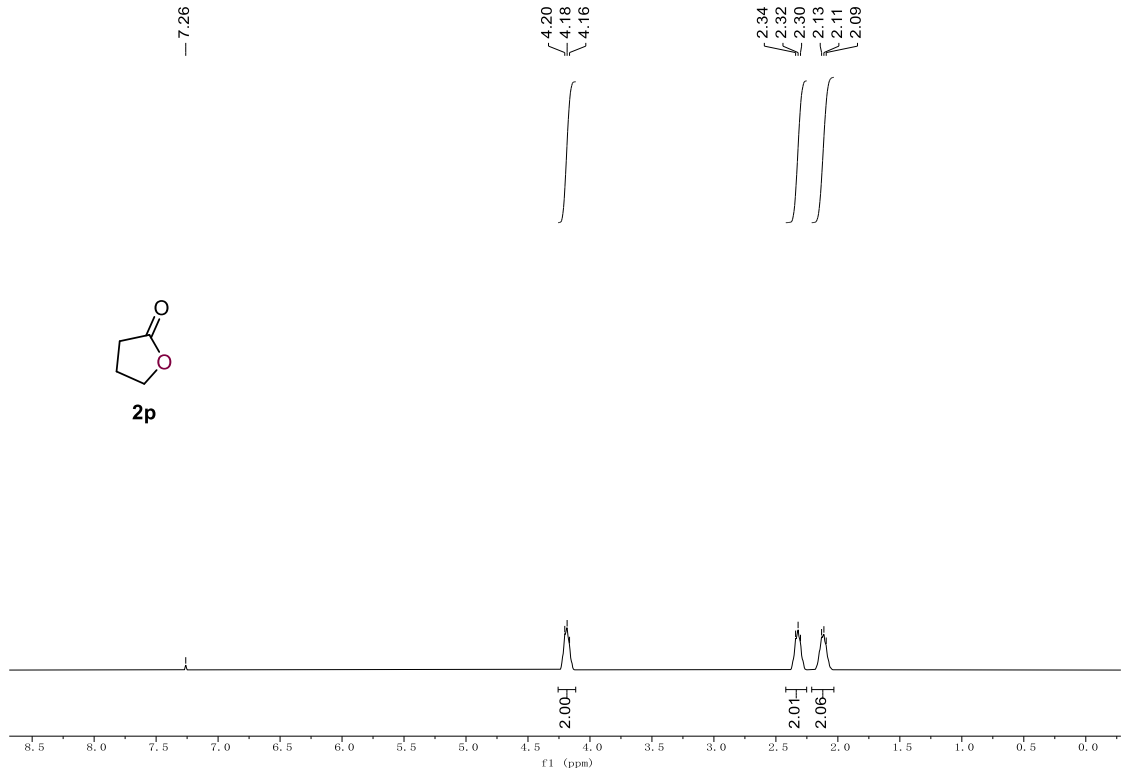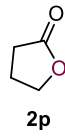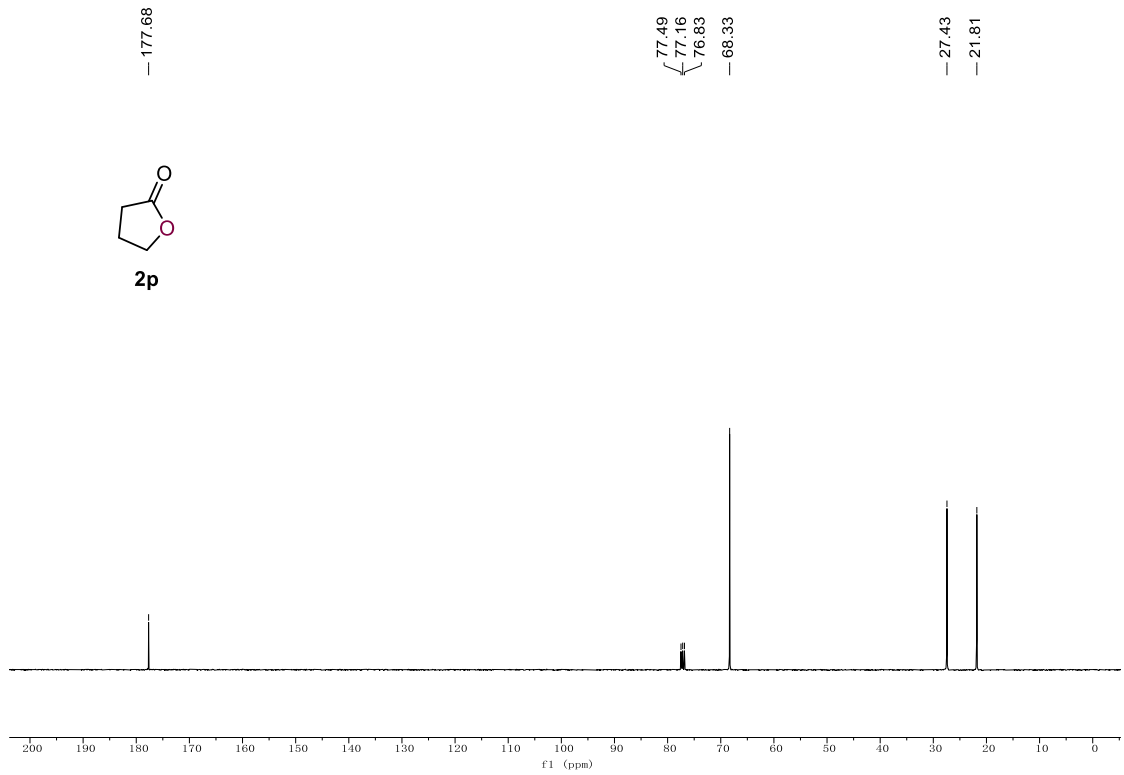

7.43  
7.42  
7.42  
7.41  
7.40  
7.39  
7.39  
7.36  
7.35  
7.35  
7.34  
7.33  
7.33  
7.32  
7.28  
7.28  
7.27  
7.27  
7.26

4.72  
4.70  
4.70  
4.68  
4.32  
4.30  
4.30  
4.28  
3.87  
3.85  
3.83  
3.80  
3.78  
2.99  
2.97  
2.95  
2.93  
2.74  
2.72  
2.70  
2.68

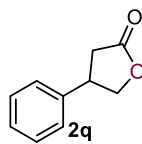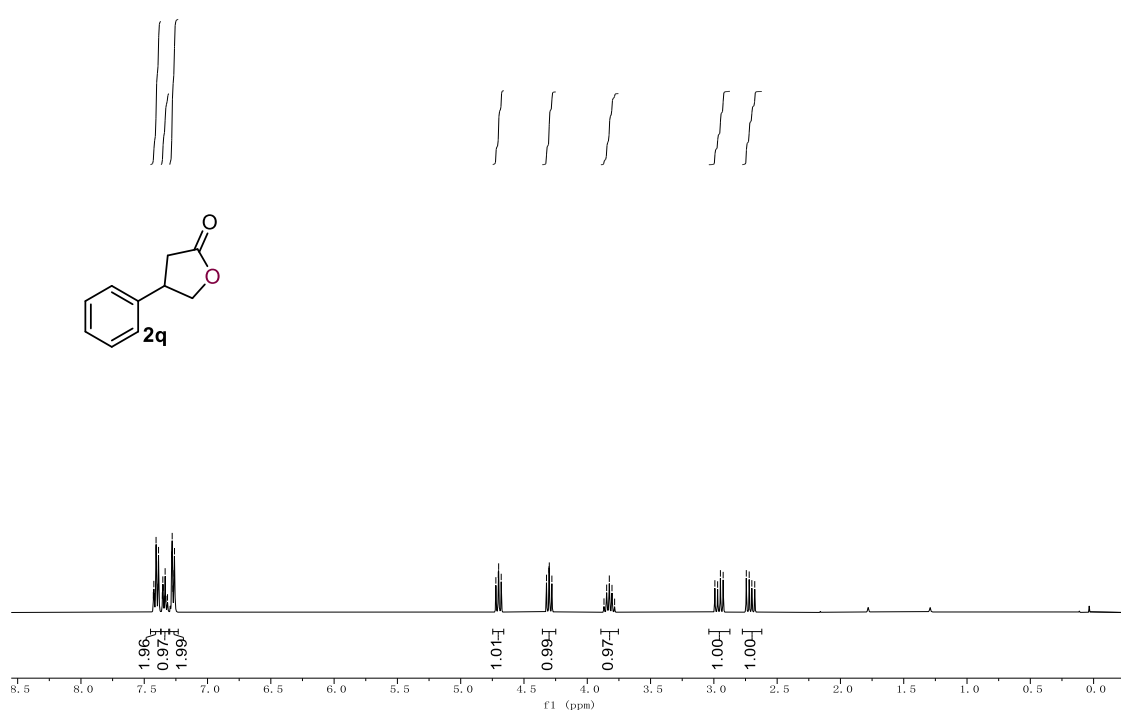

— 176.55

— 139.49

129.21  
127.78  
126.79

77.48  
77.16  
76.84  
74.12

— 41.14  
— 35.76

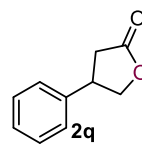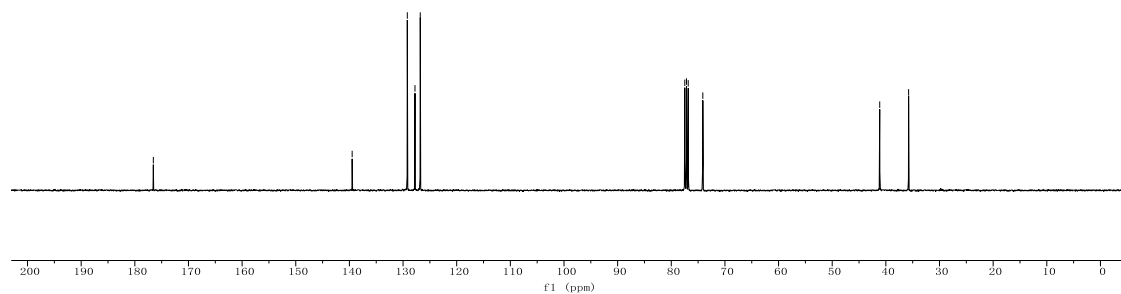

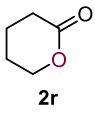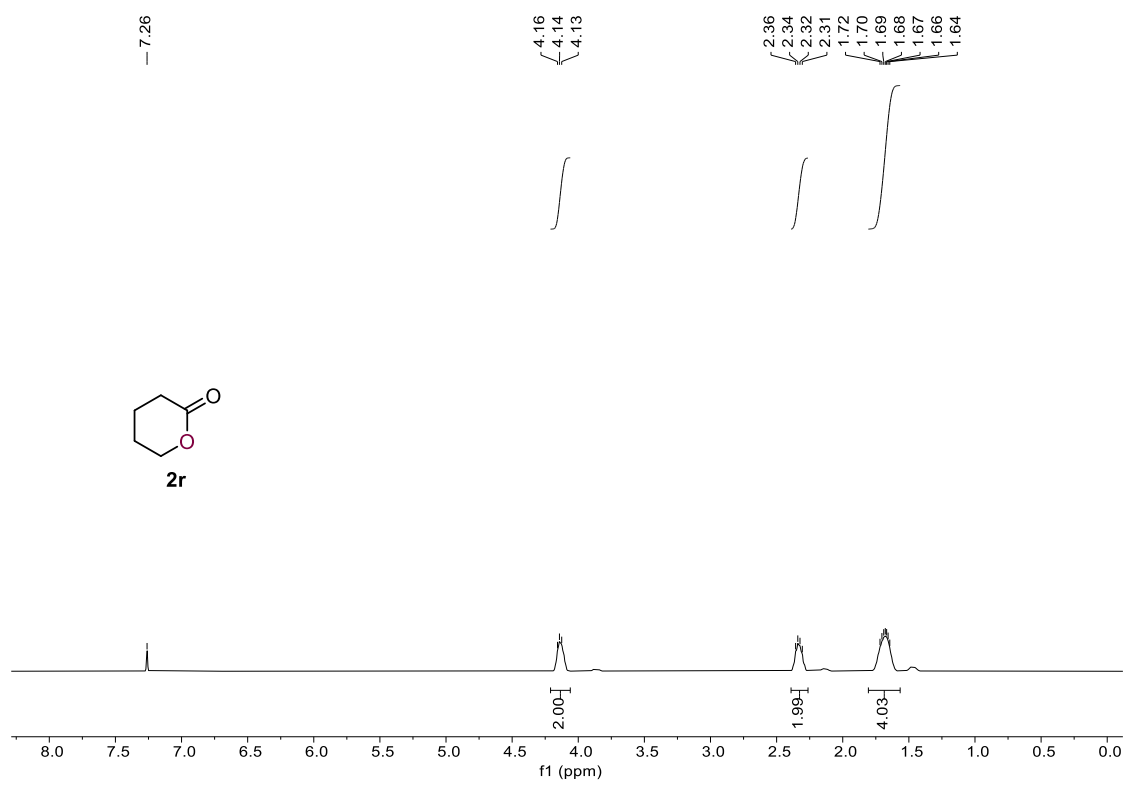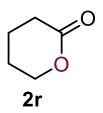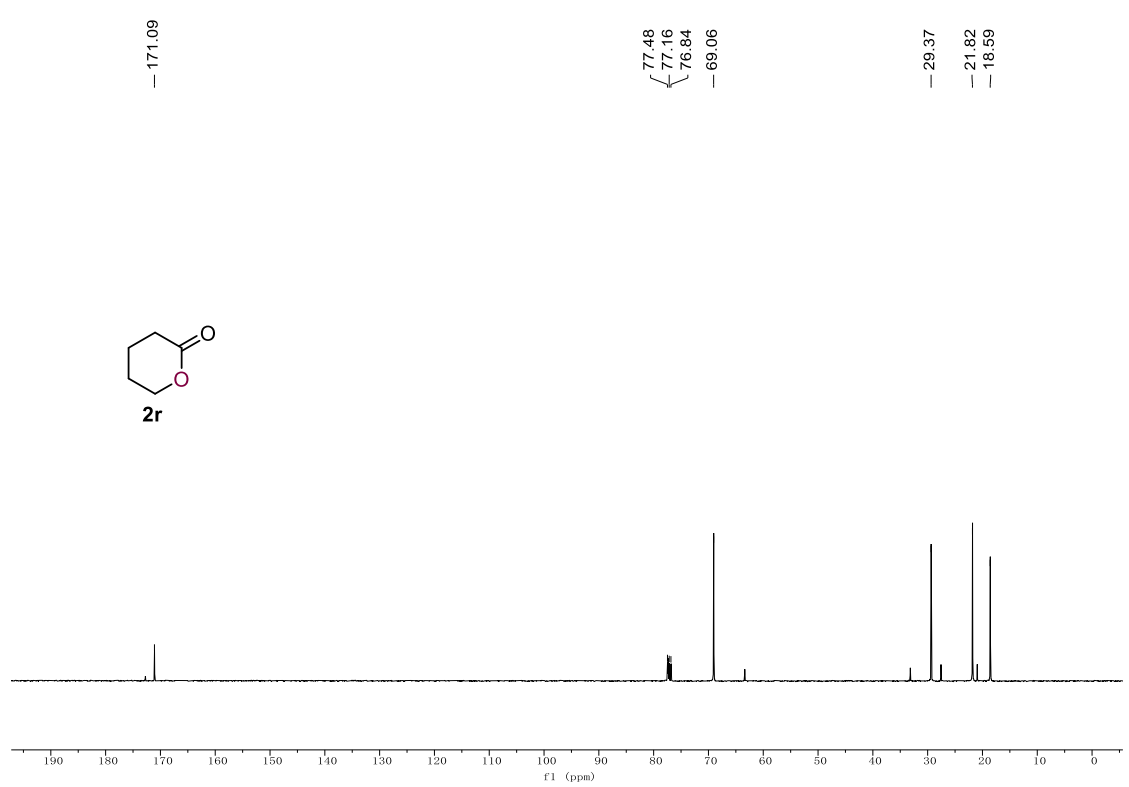

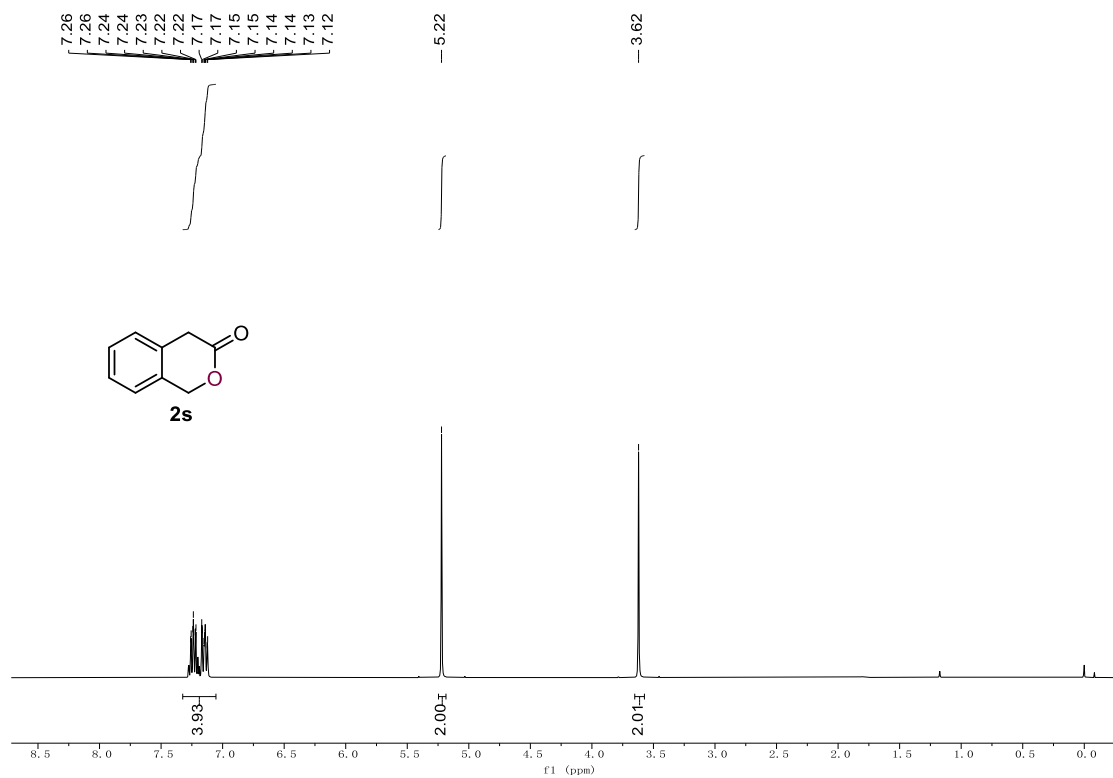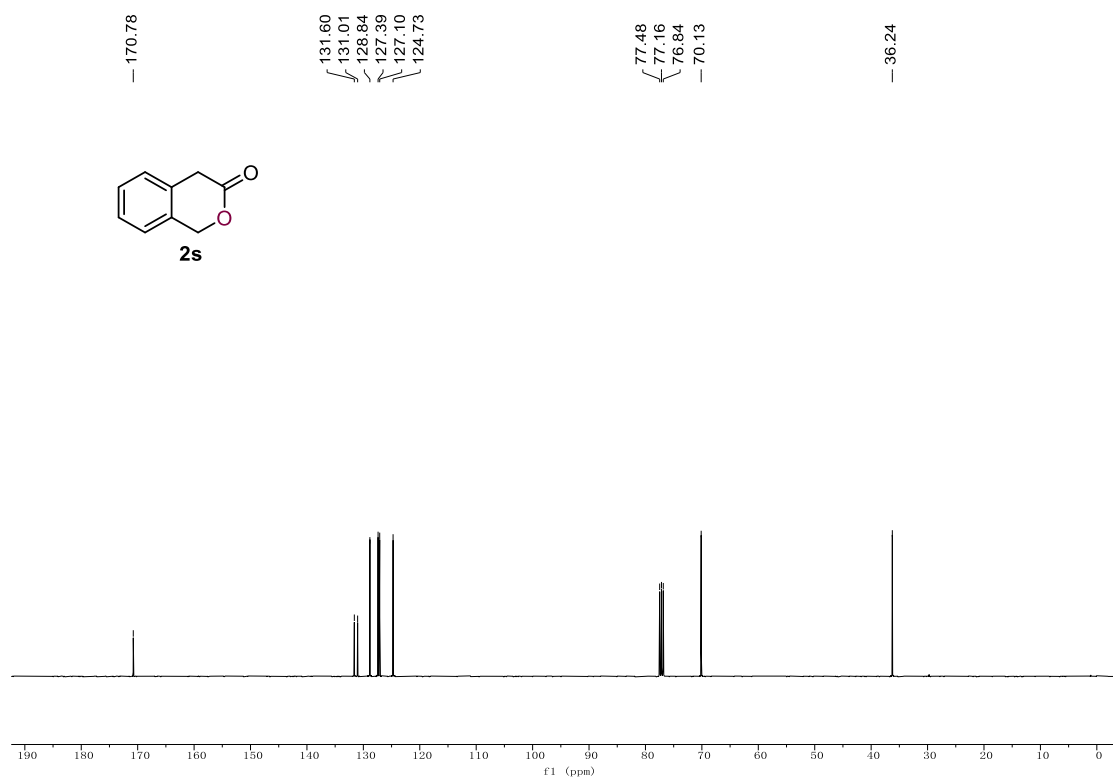

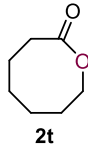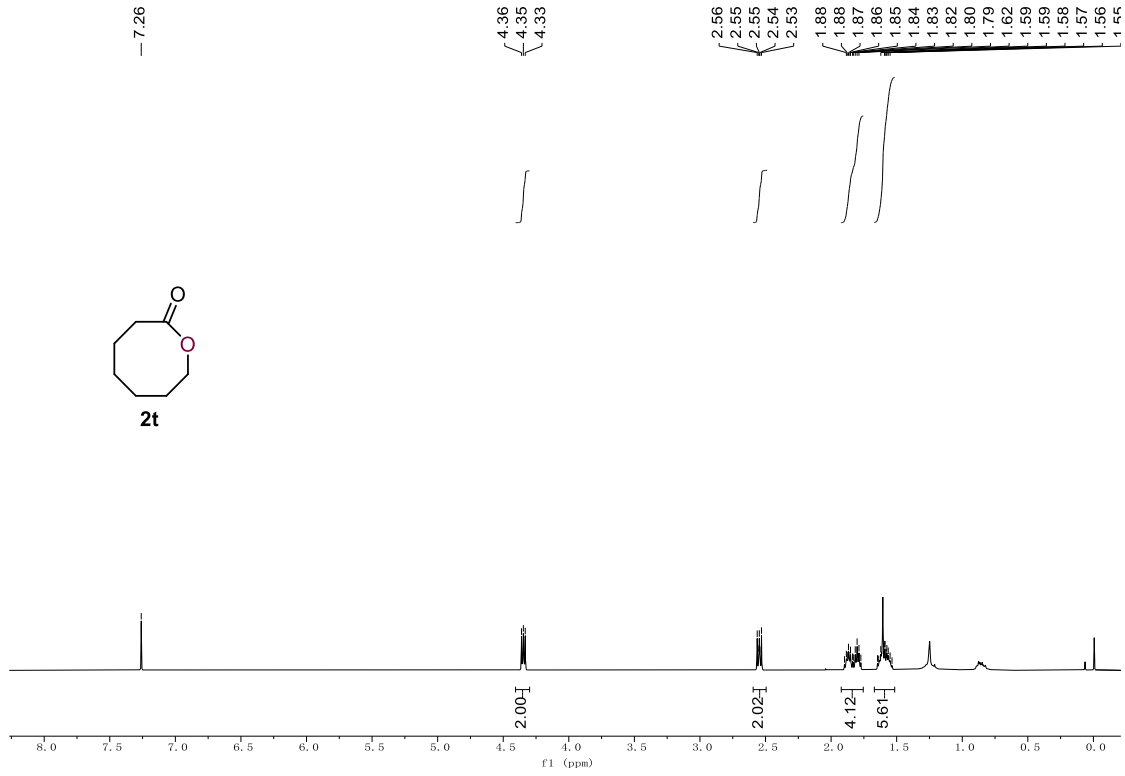

— 176.97

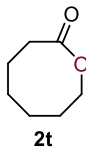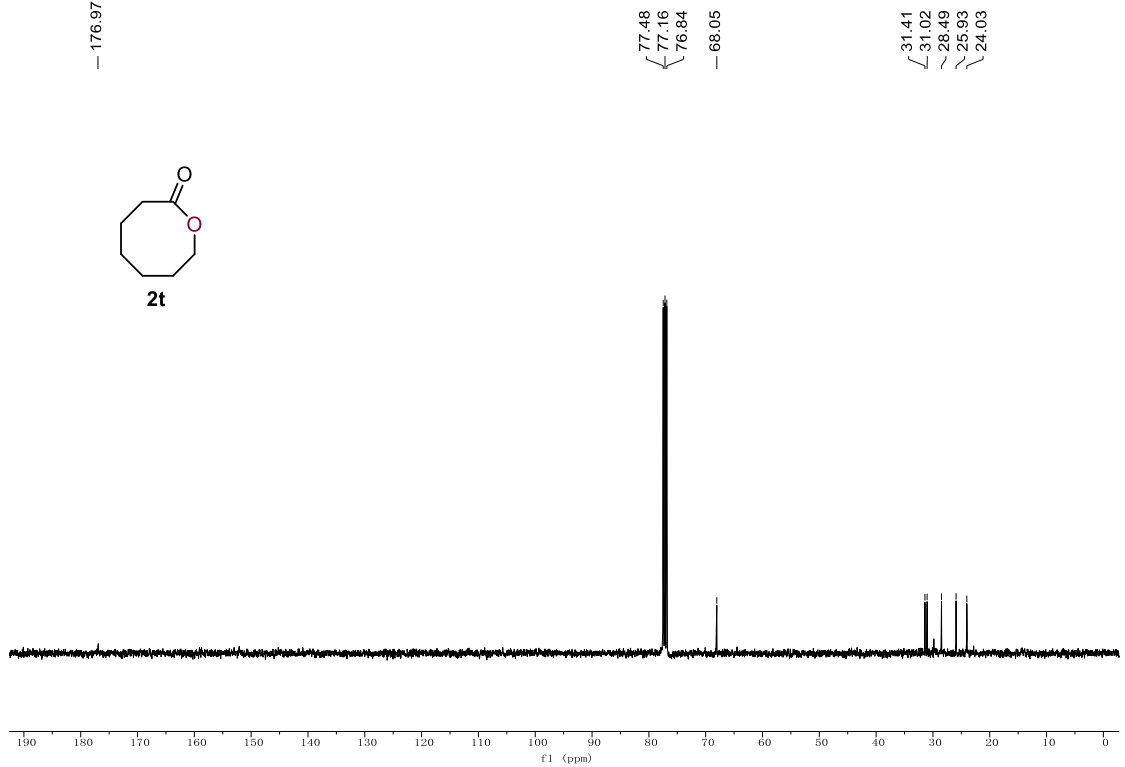

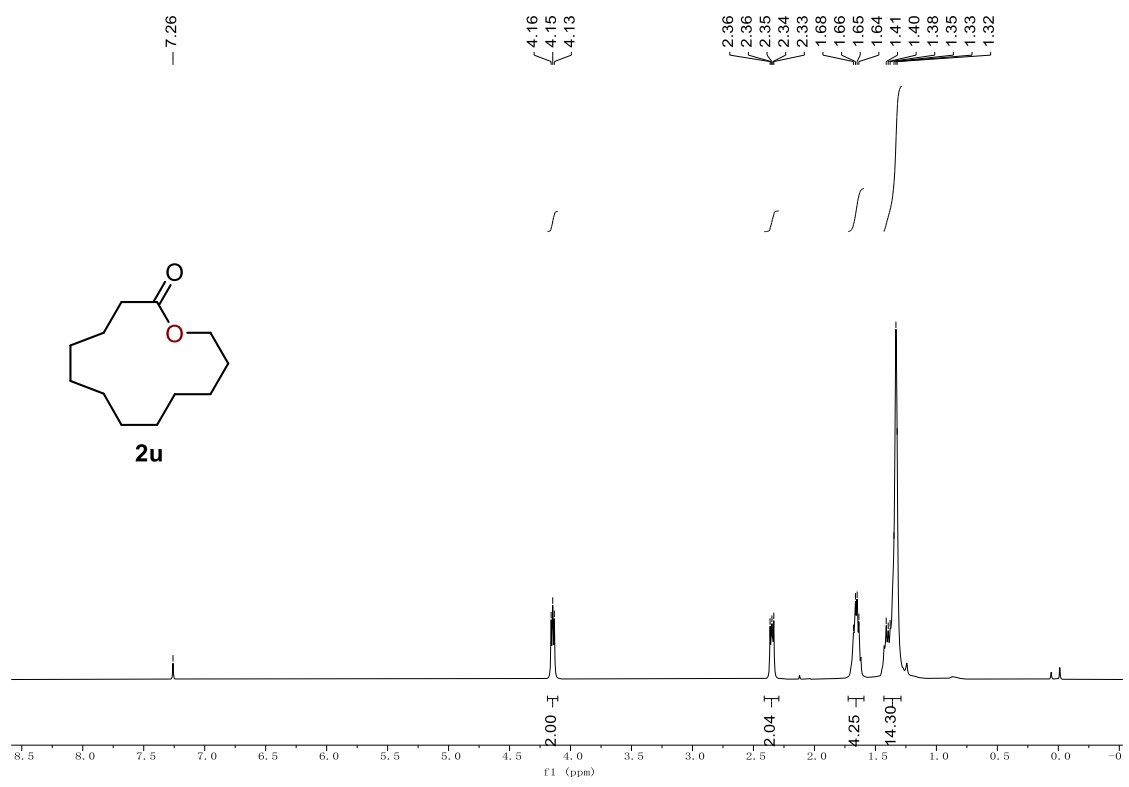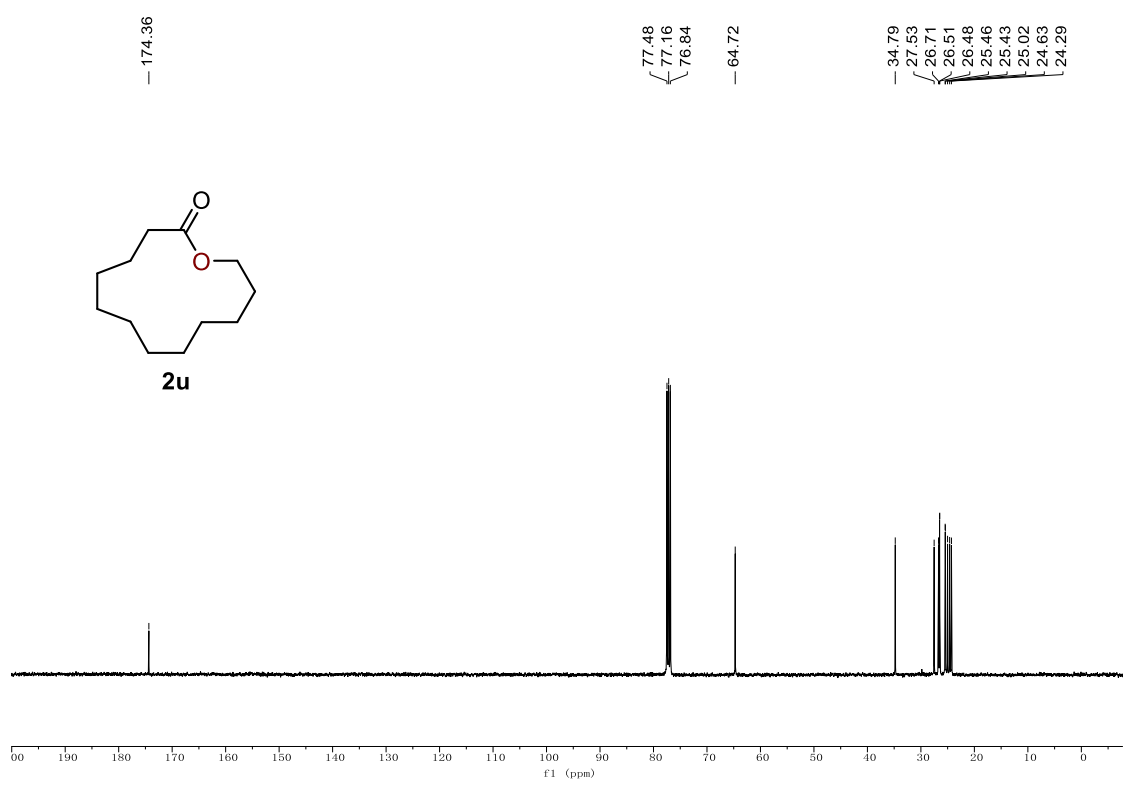

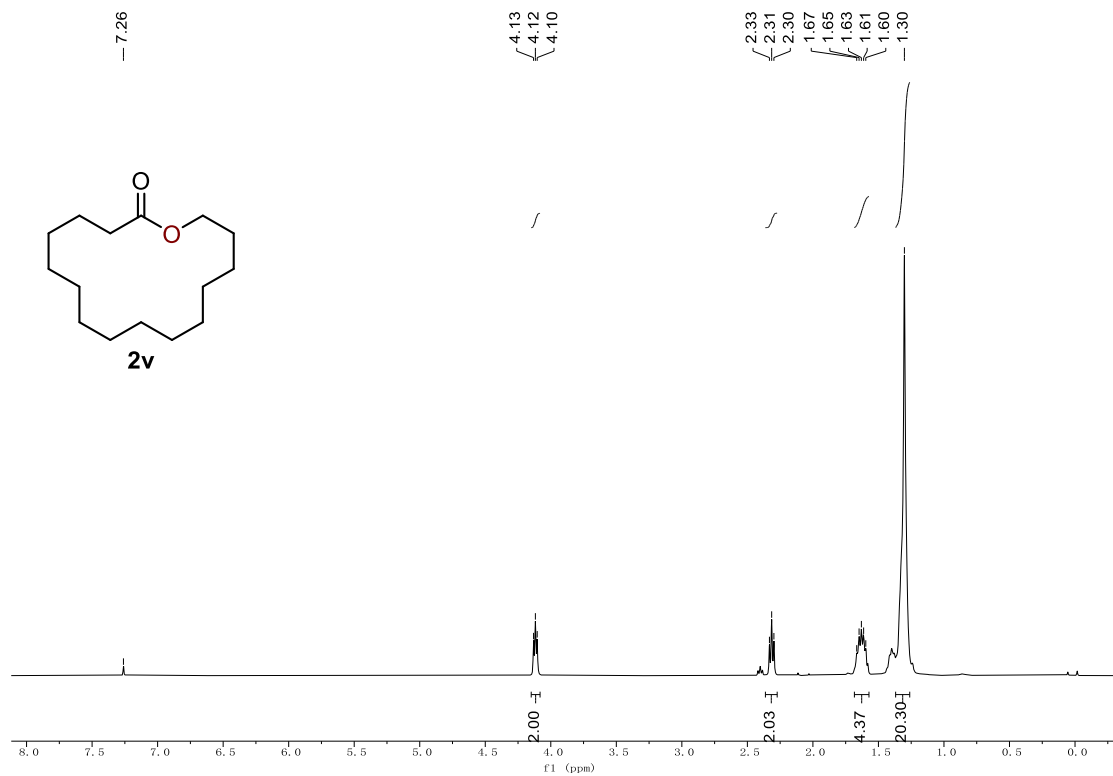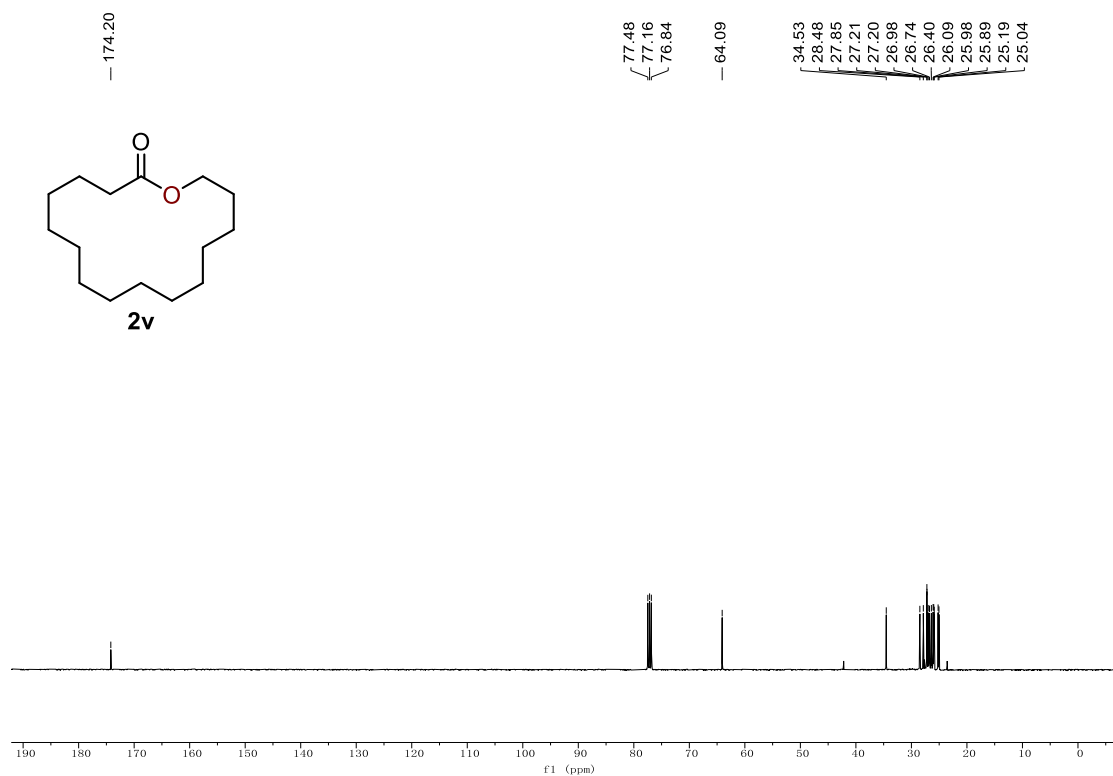



8.27  
8.25  
8.25  
7.70  
7.68  
7.66  
7.66  
7.58  
7.56  
7.54  
7.50  
7.50  
7.48  
7.46  
7.34  
7.32  
7.30  
7.29  
7.28  
7.26

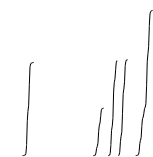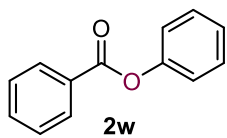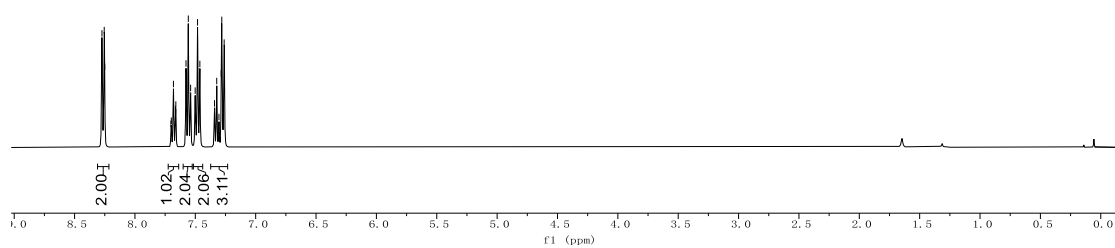

165.31  
151.06  
133.71  
130.28  
129.67  
129.61  
128.69  
126.01  
121.84  
77.48  
77.16  
76.84

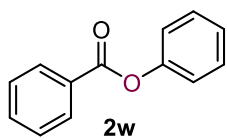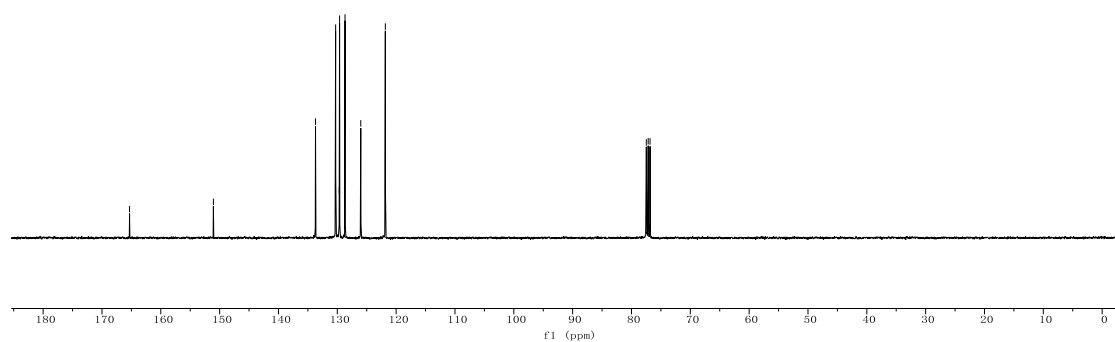

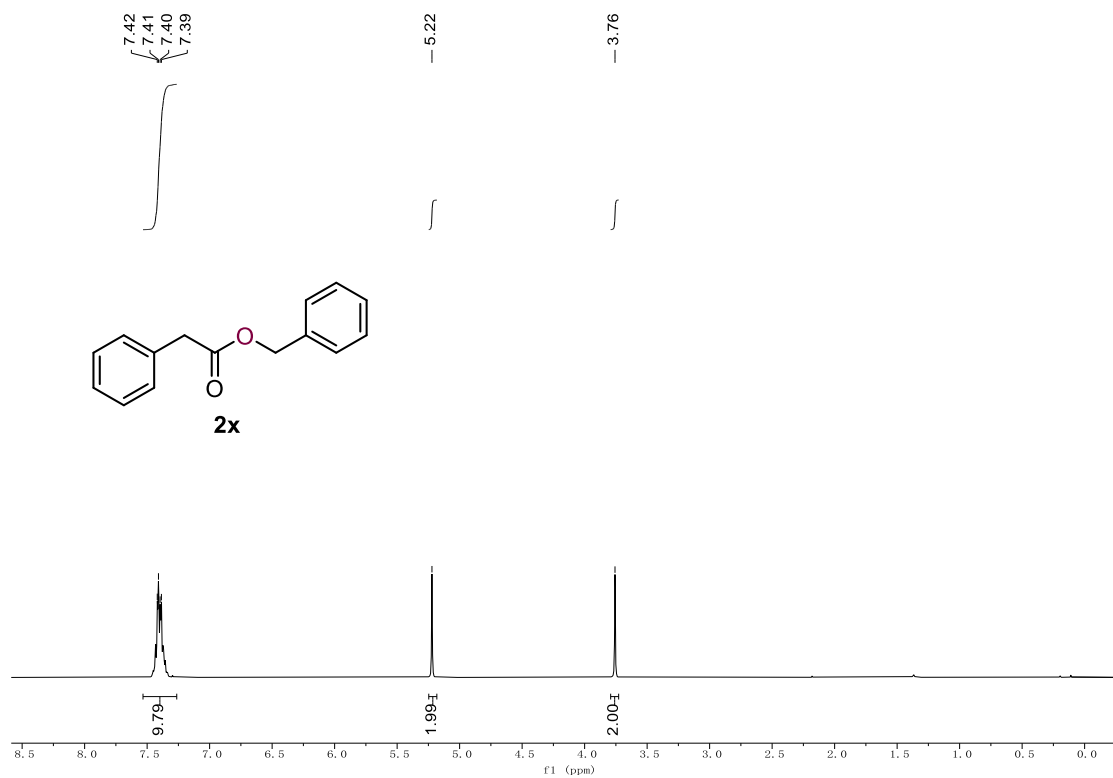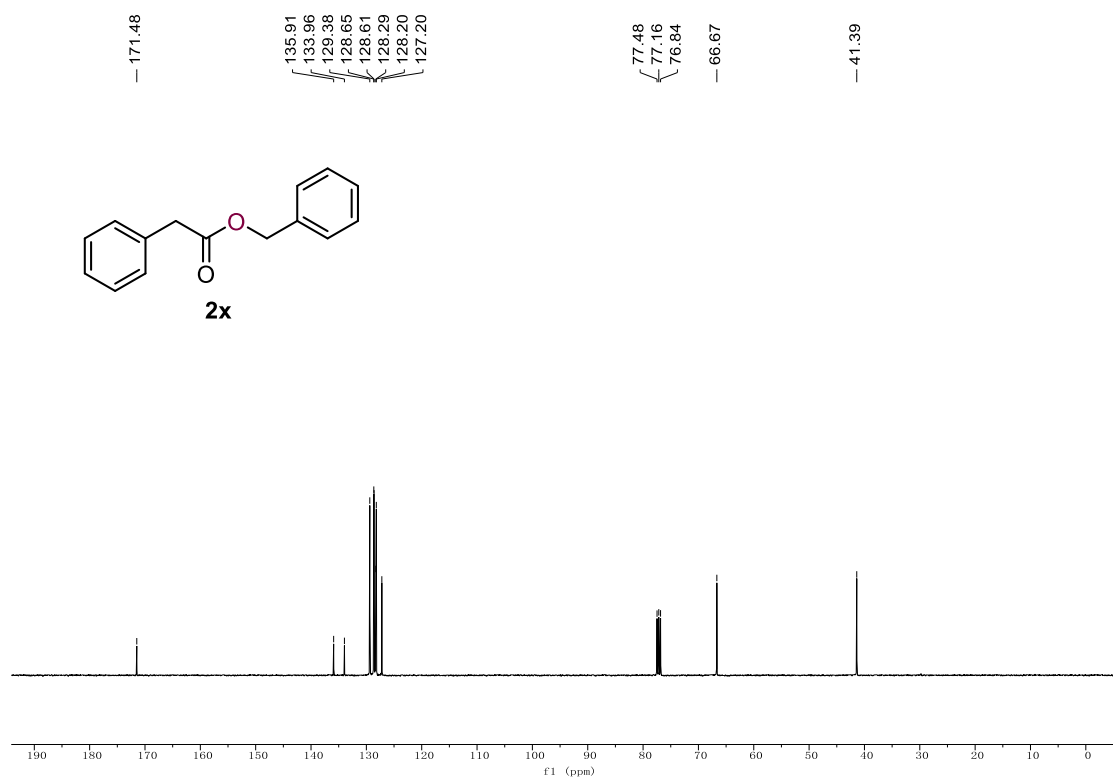

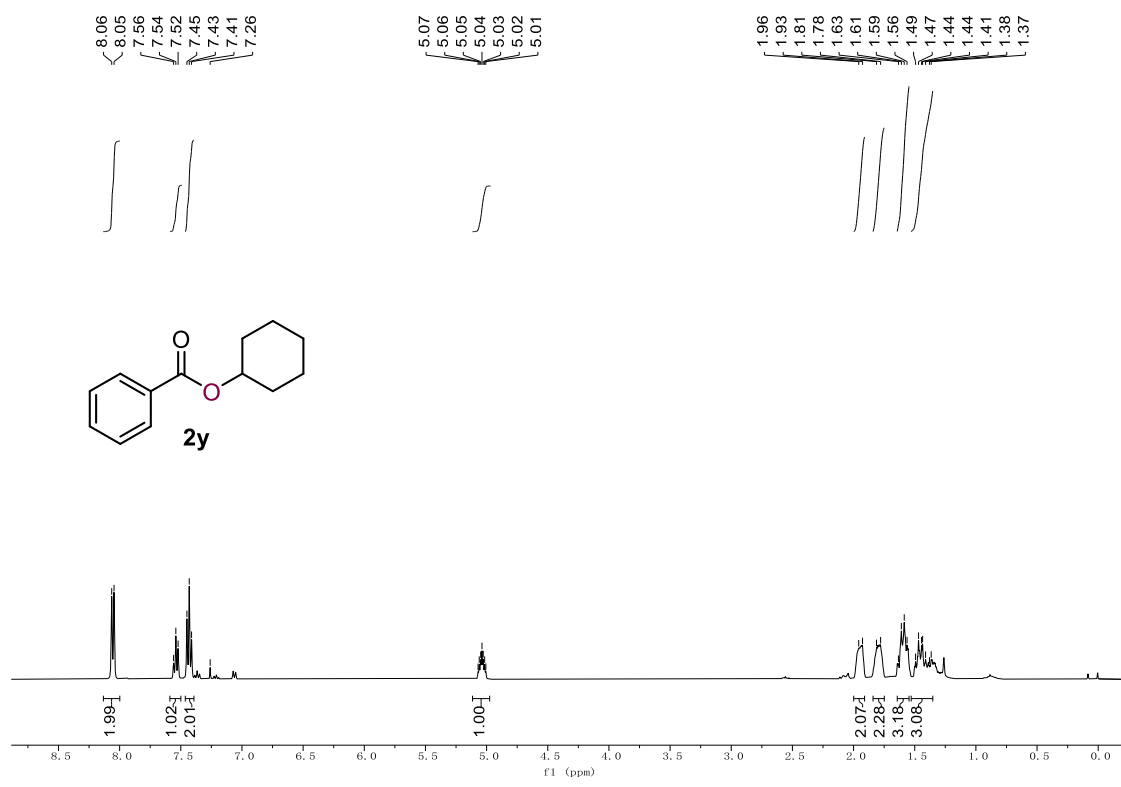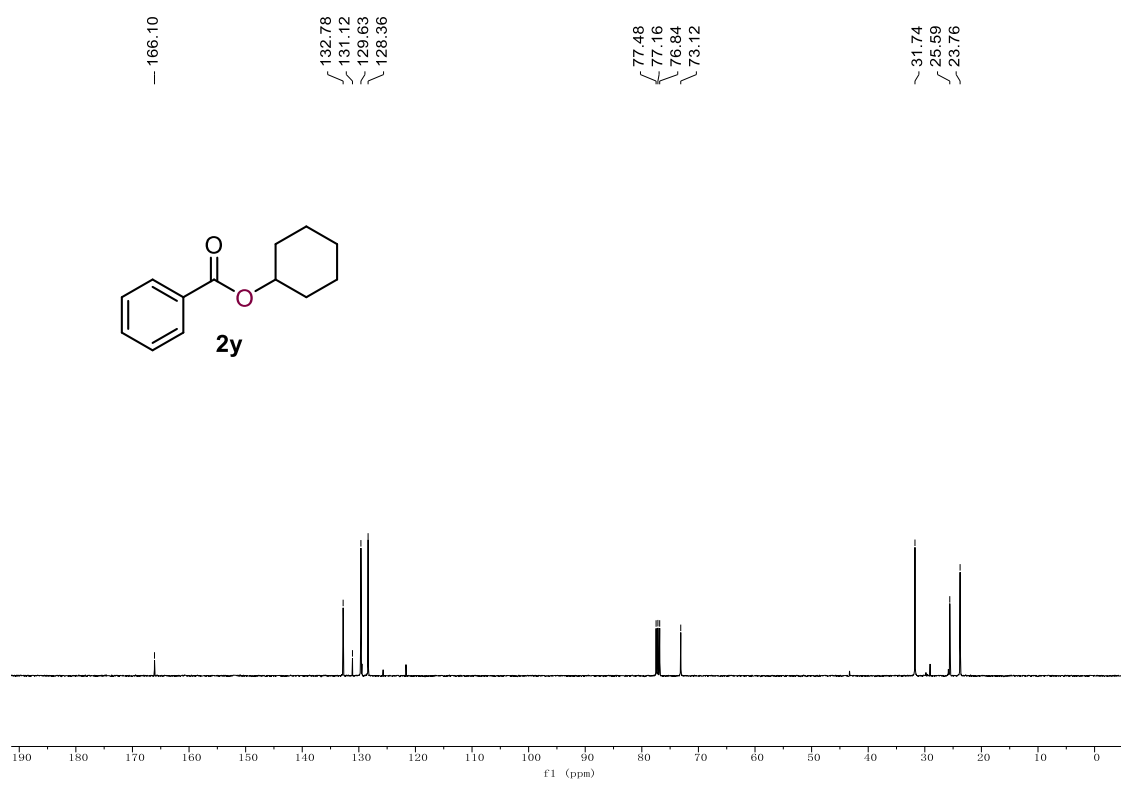

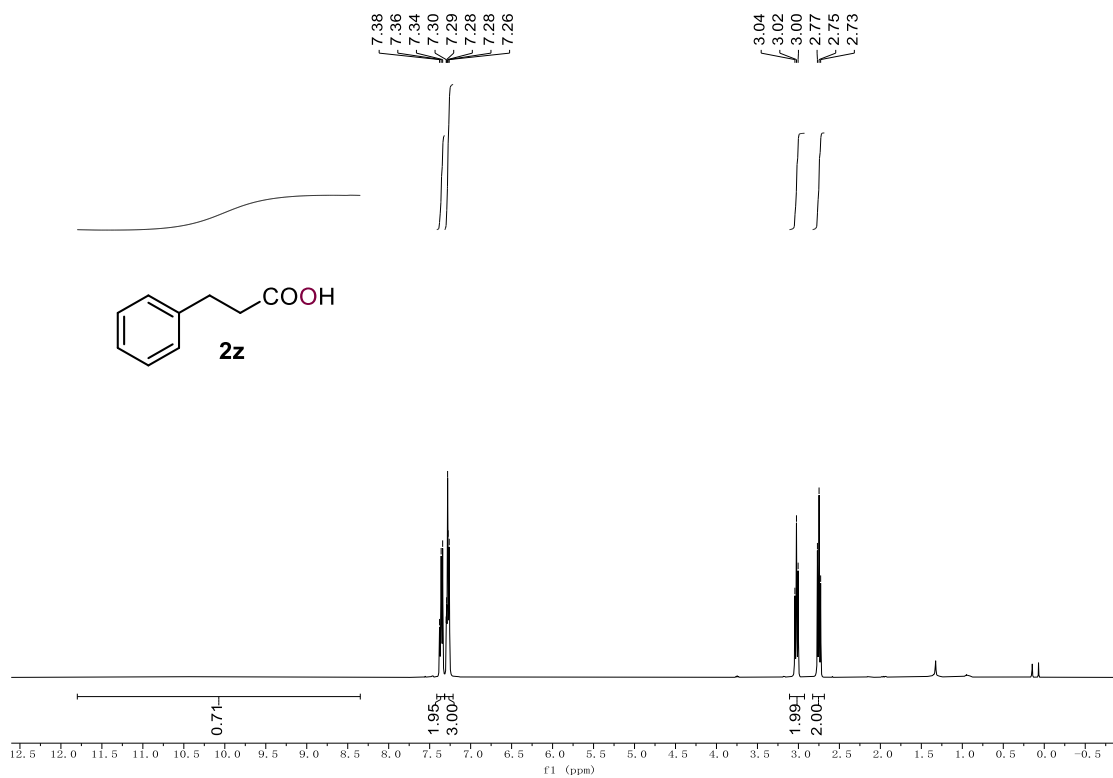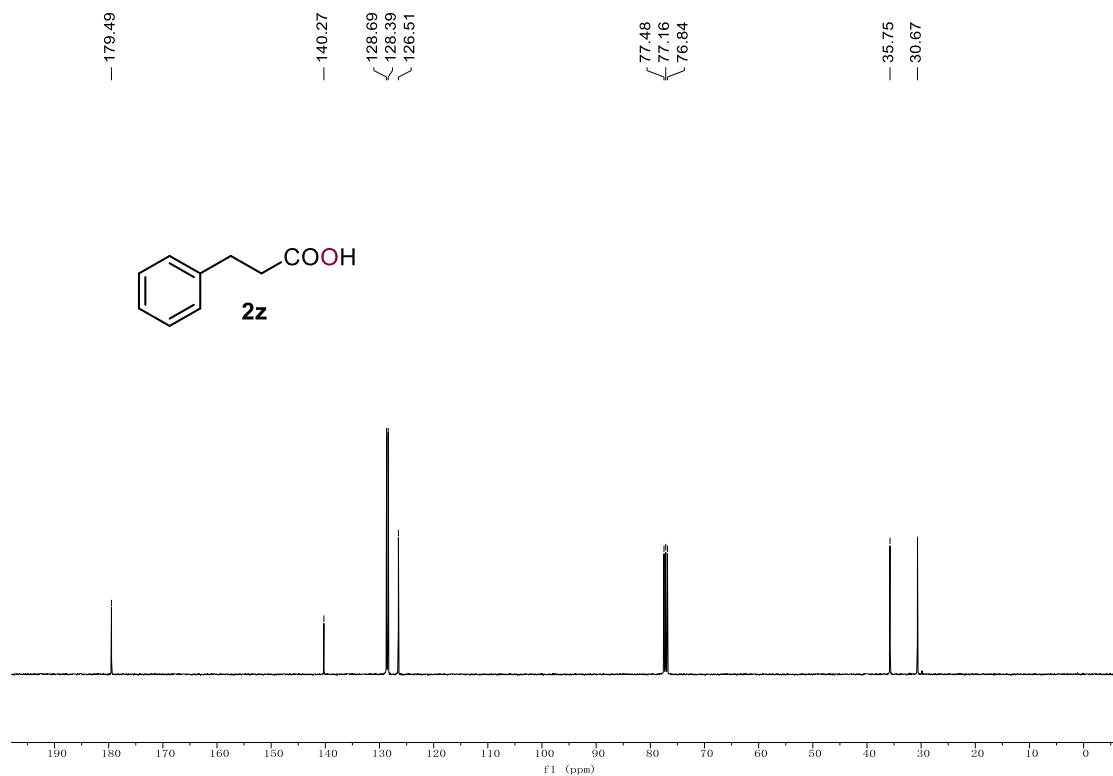

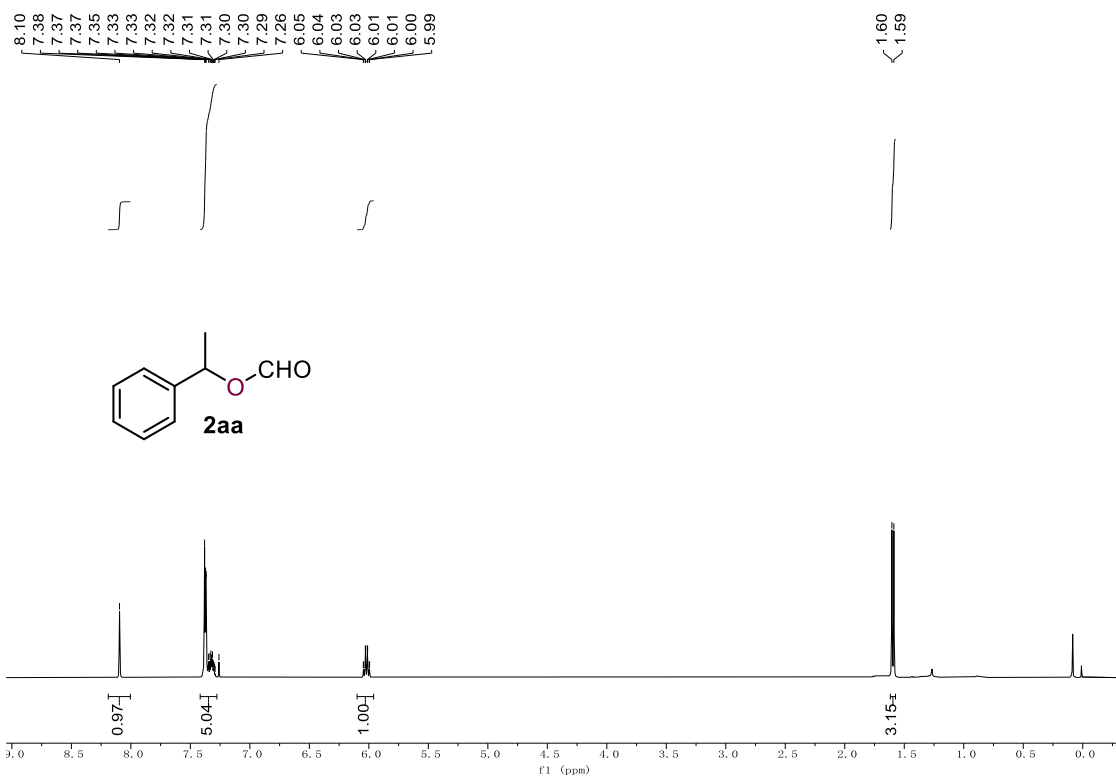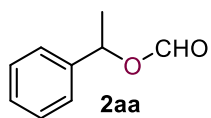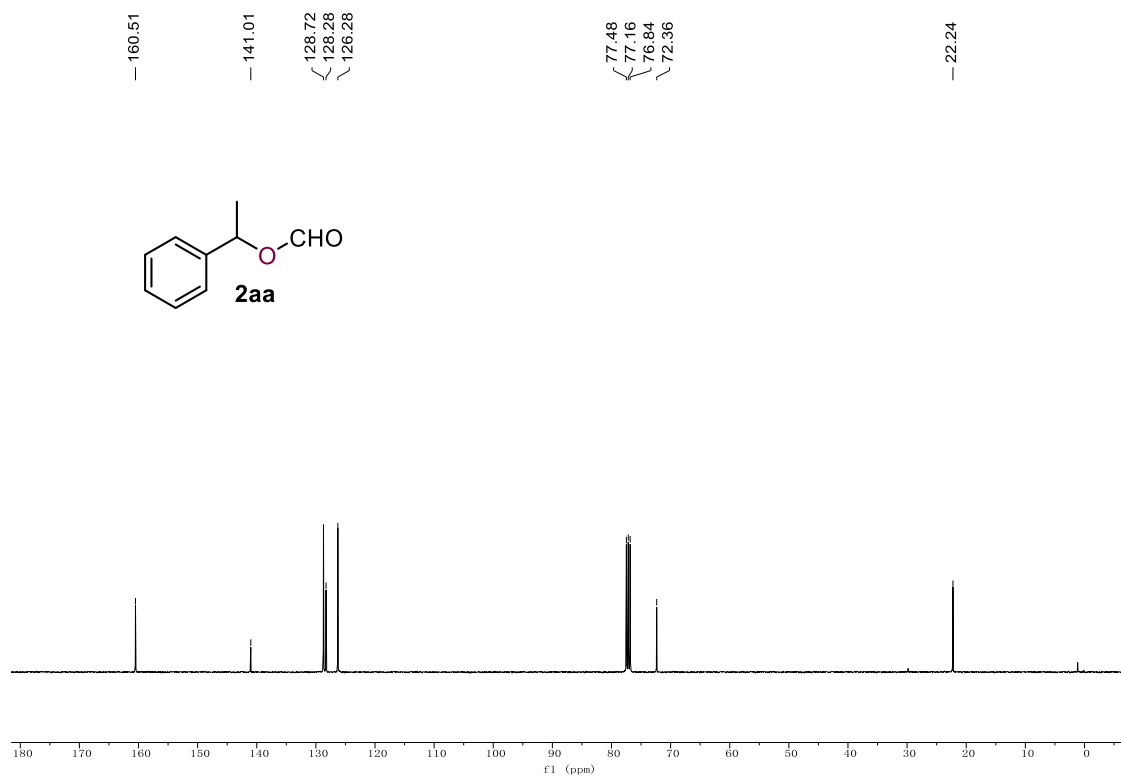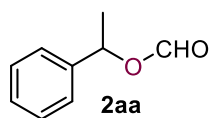

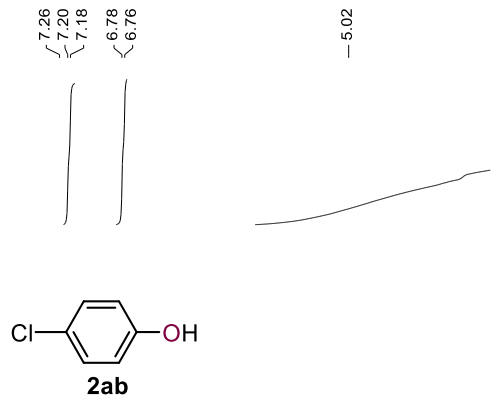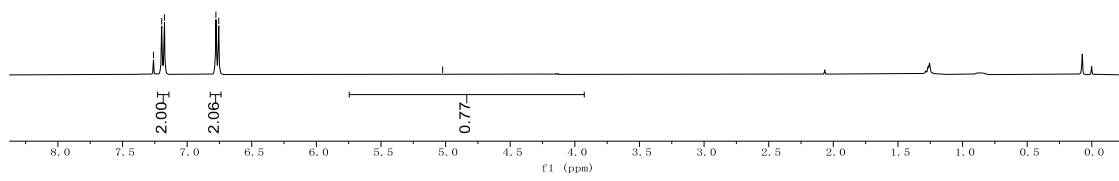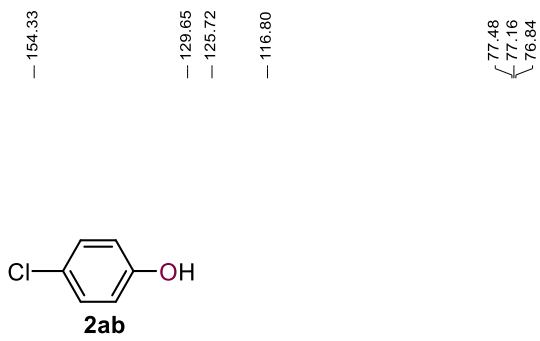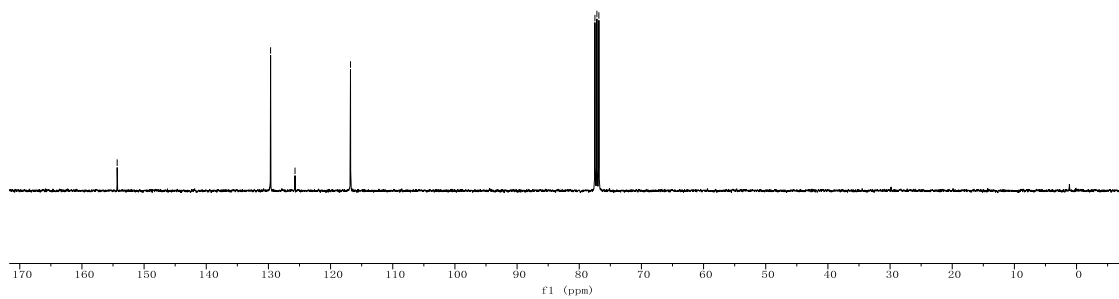

8.17  
8.16  
8.15  
8.14  
8.12  
8.09  
7.63  
7.61  
7.52  
7.52  
7.51  
7.50  
7.48  
7.42  
7.41  
7.40  
7.40  
7.39  
7.36  
7.36  
7.35  
7.34  
7.34  
7.32  
7.28  
7.26  
7.24  
7.24  
6.61  
6.58

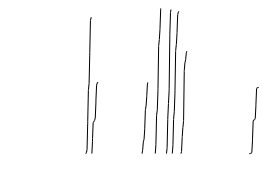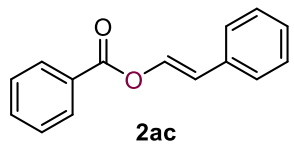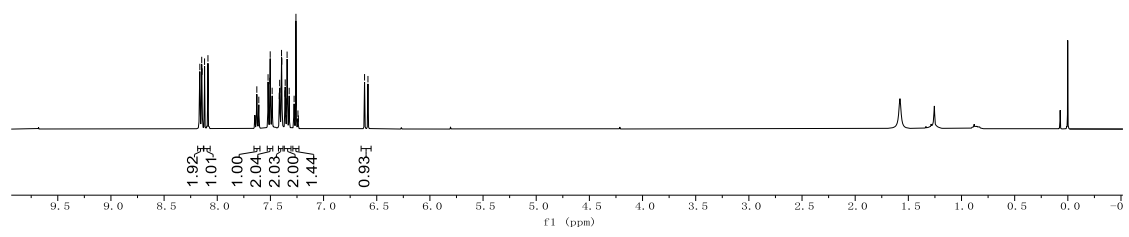

163.82  
136.62  
134.31  
133.83  
130.18  
129.02  
128.91  
128.74  
127.64  
126.45  
116.01  
77.48  
77.16  
76.84

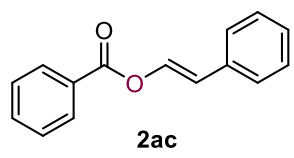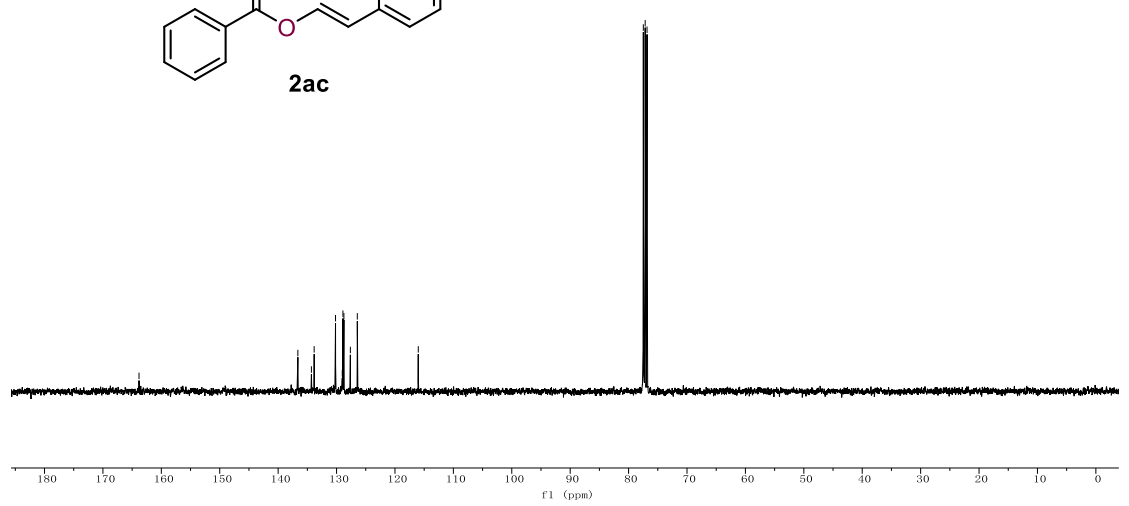

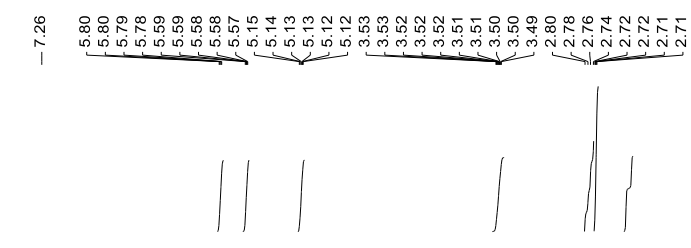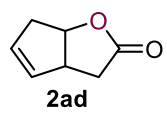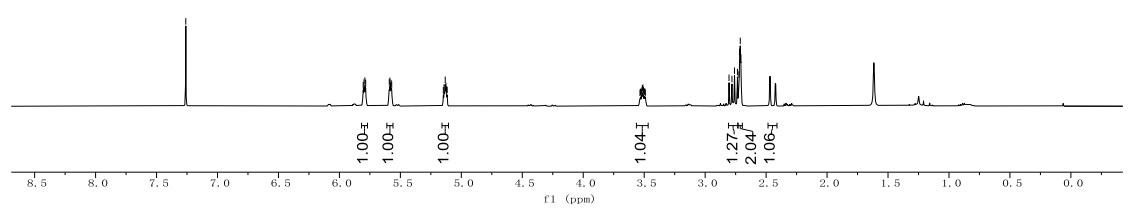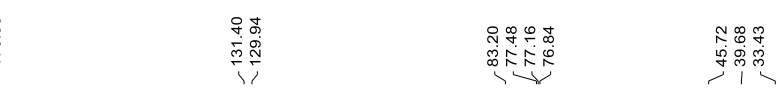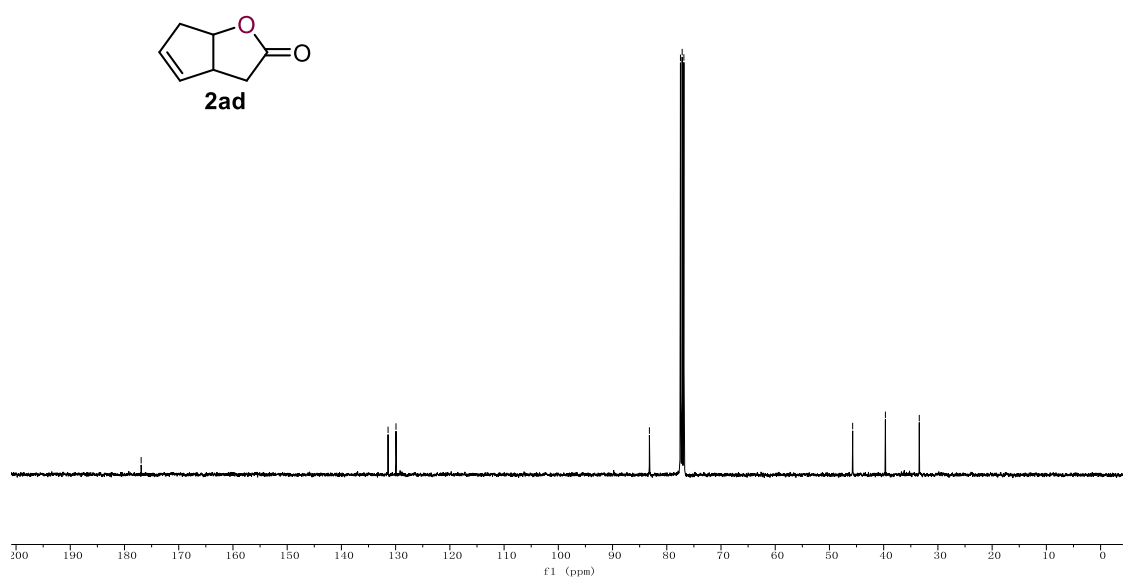



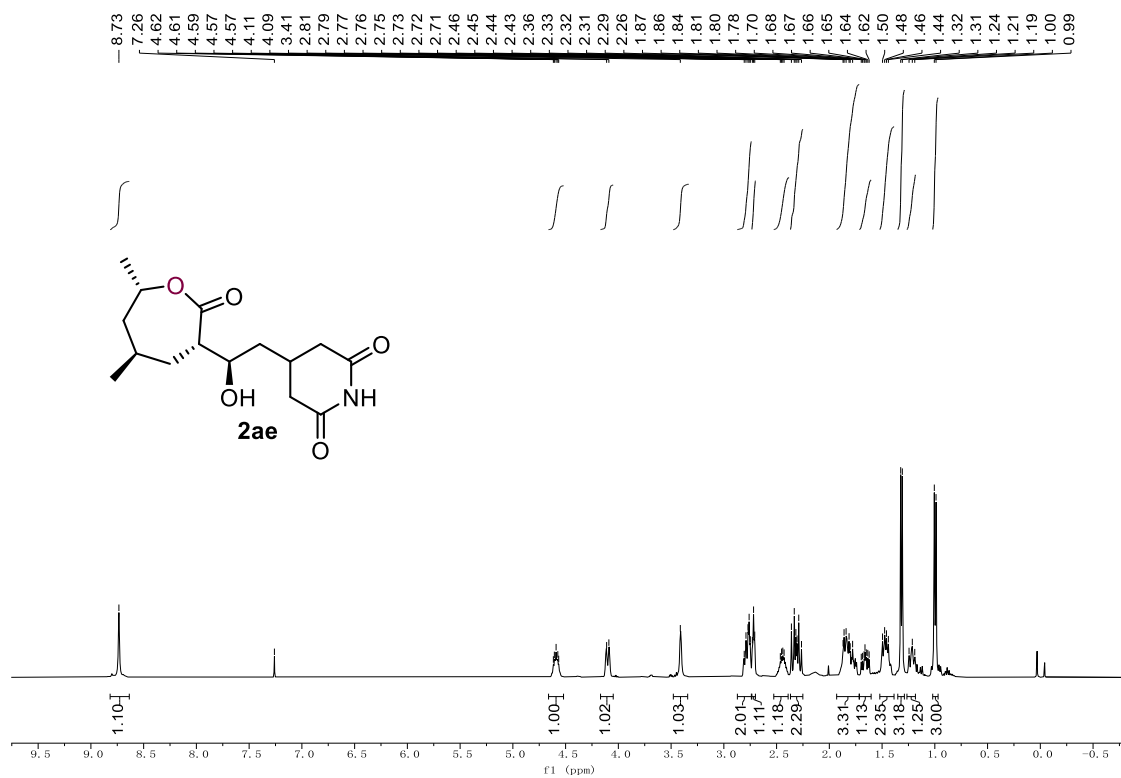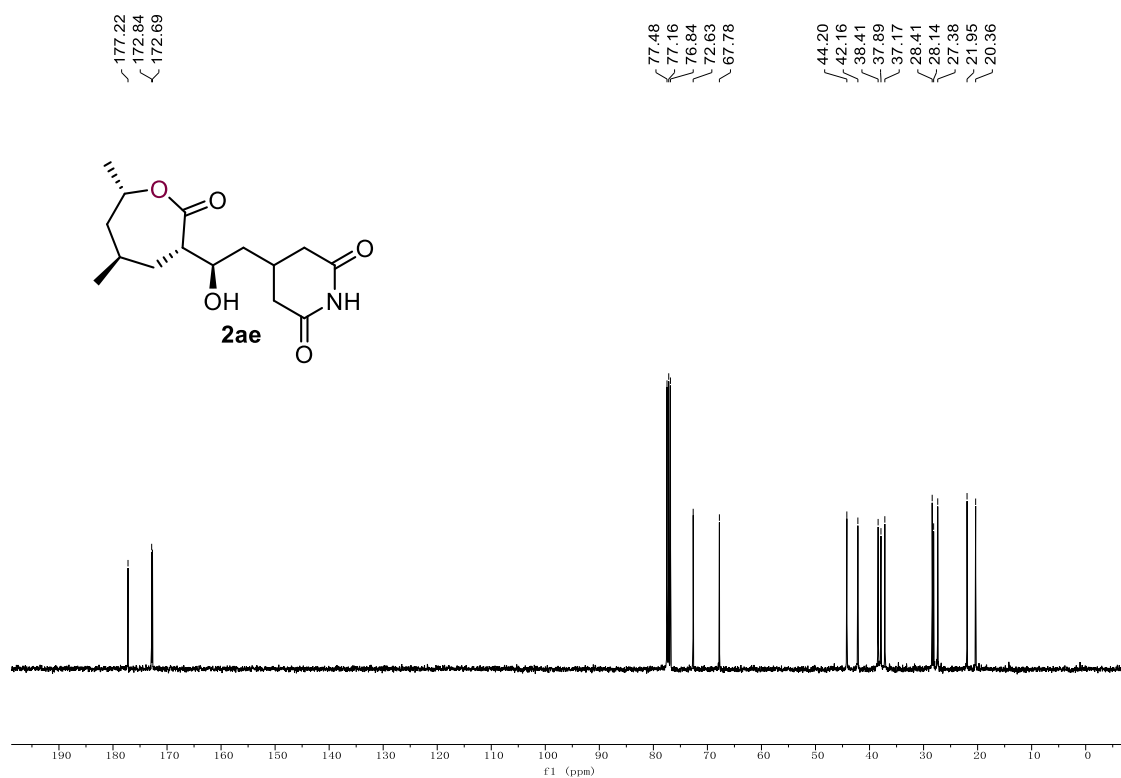

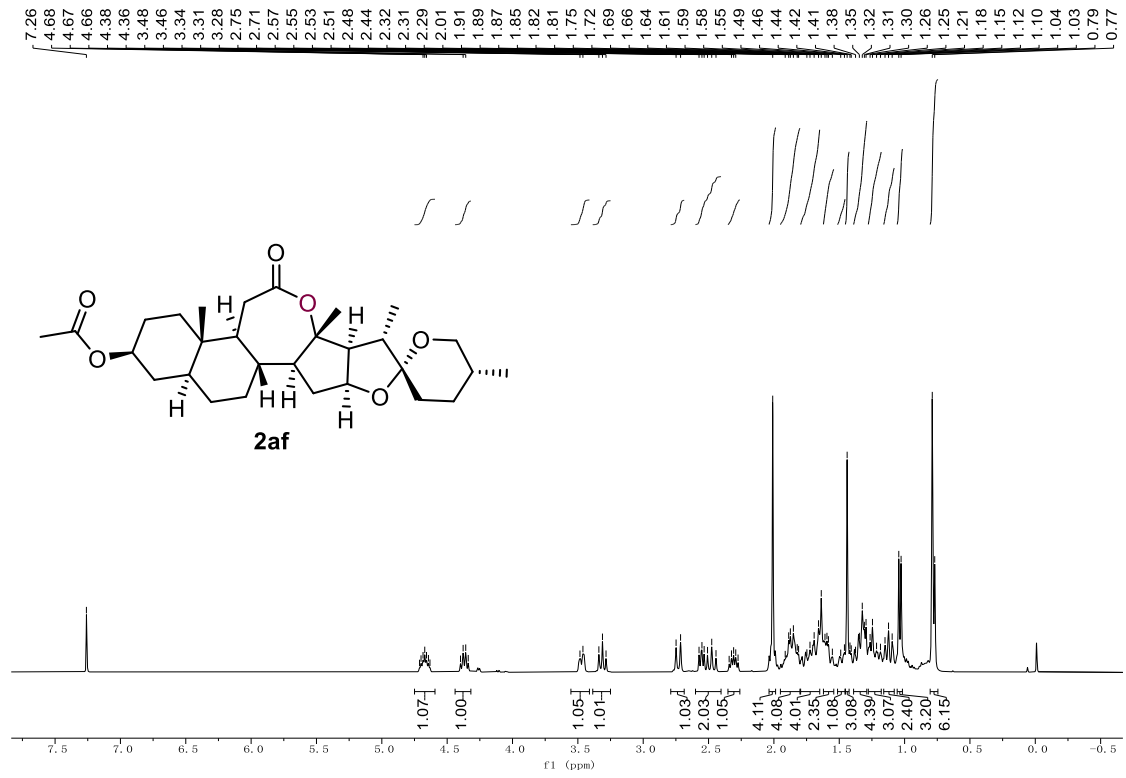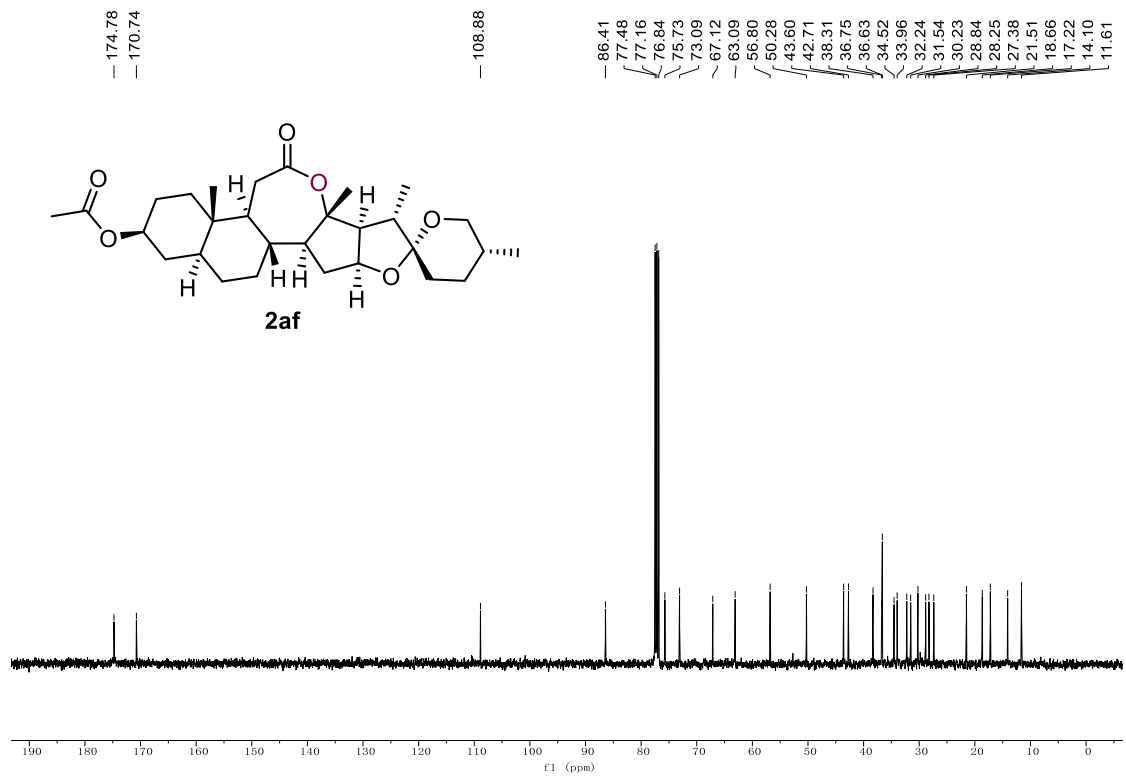

7.72  
7.71  
7.70  
7.69  
7.55  
7.26  
7.16  
7.15  
7.14  
7.14  
7.09  
7.08  
7.07  
7.06  
7.05  
7.04  
6.94  
6.94  
6.93  
6.92  
6.92  
6.91  
6.90  
6.89  
6.87

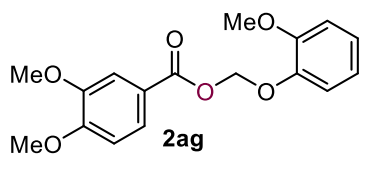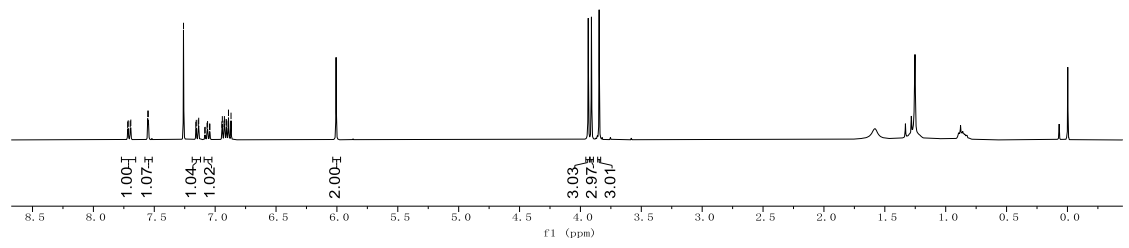

165.37  
153.53  
150.51  
148.82  
146.19  
124.23  
124.15  
122.09  
120.99  
117.97  
112.38  
112.30  
110.41  
87.71  
77.48  
77.16  
76.84  
56.17  
55.96

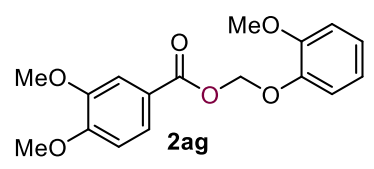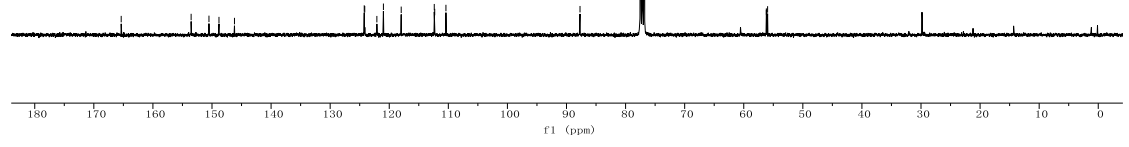

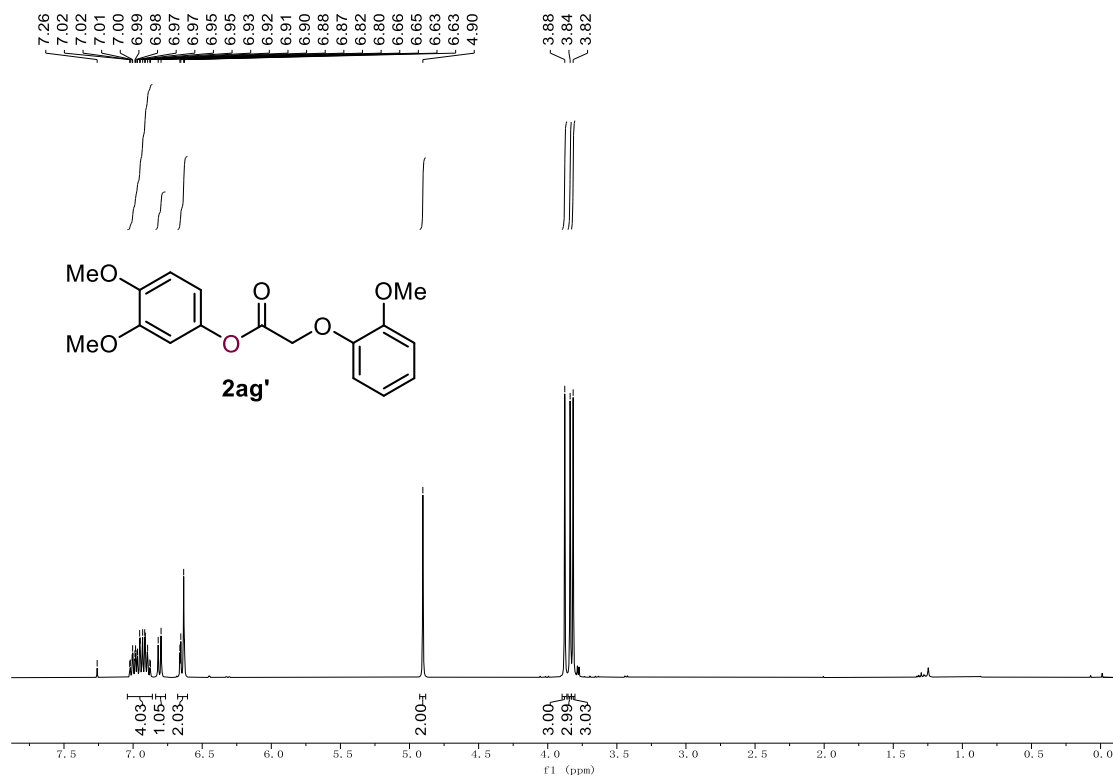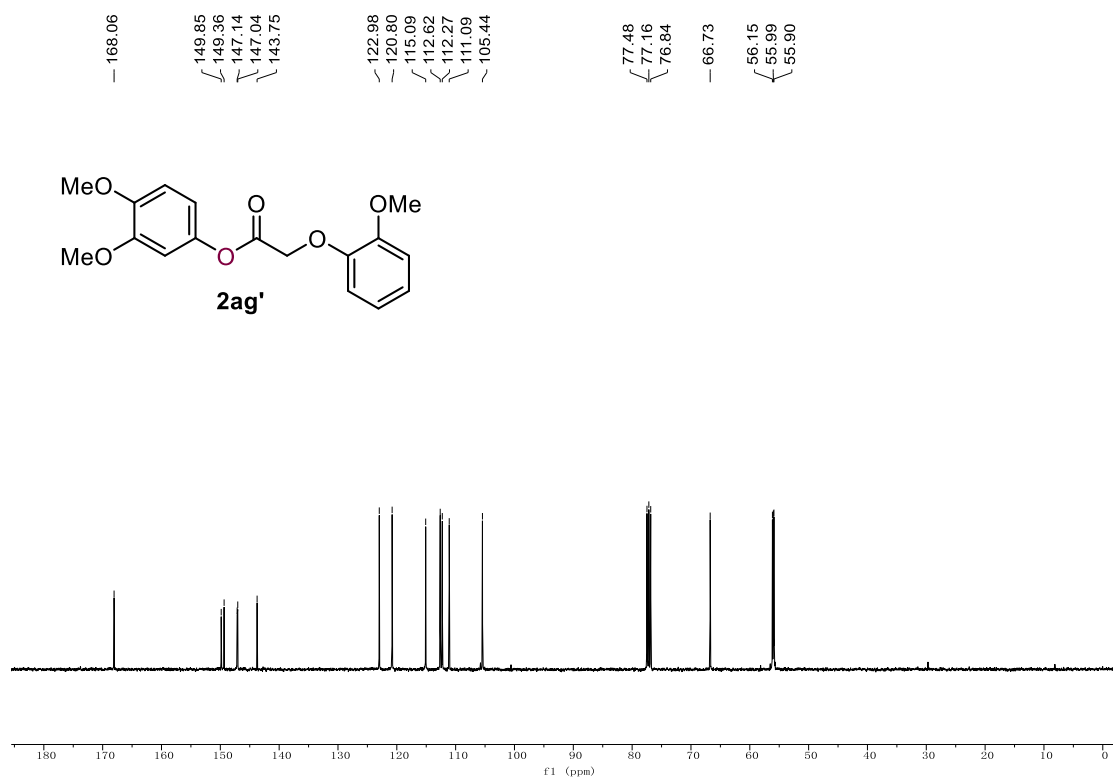

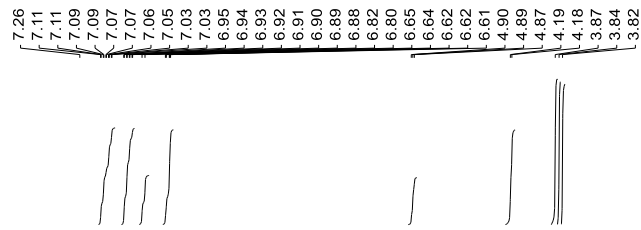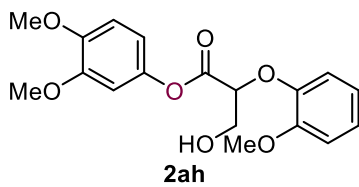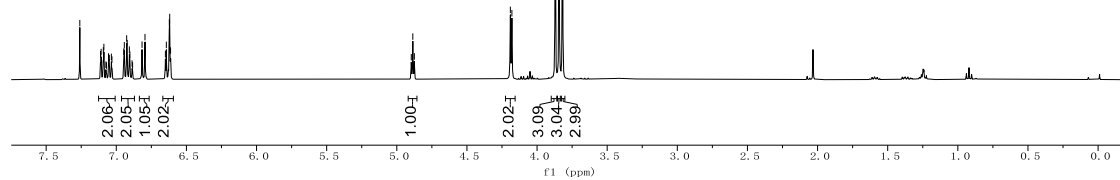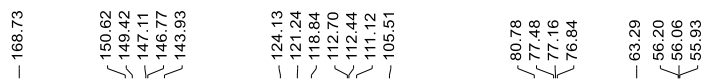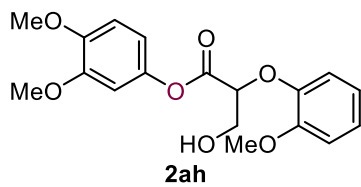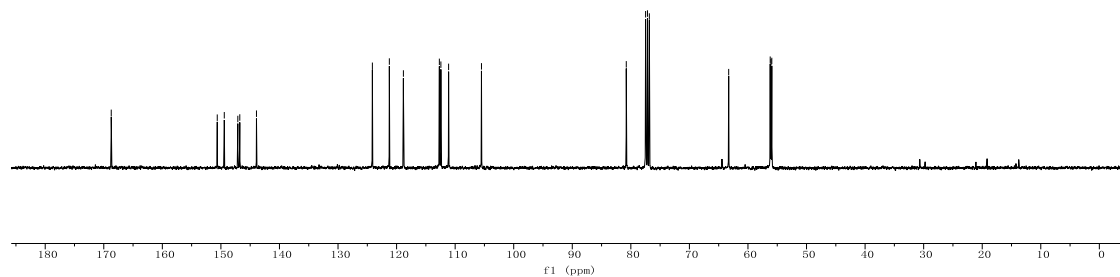

7.74  
7.73  
7.72  
7.71  
7.53  
7.26  
7.12  
7.12  
7.10  
7.09  
7.09  
7.07  
7.07  
7.05  
7.05  
6.93  
6.93  
6.91  
6.91  
6.89  
6.87  
6.86  
6.85  
6.84  
6.83  
6.55  
6.54  
6.52  
6.52  
4.05  
4.03  
4.02  
4.00  
3.95  
3.94  
3.93  
3.91  
3.85

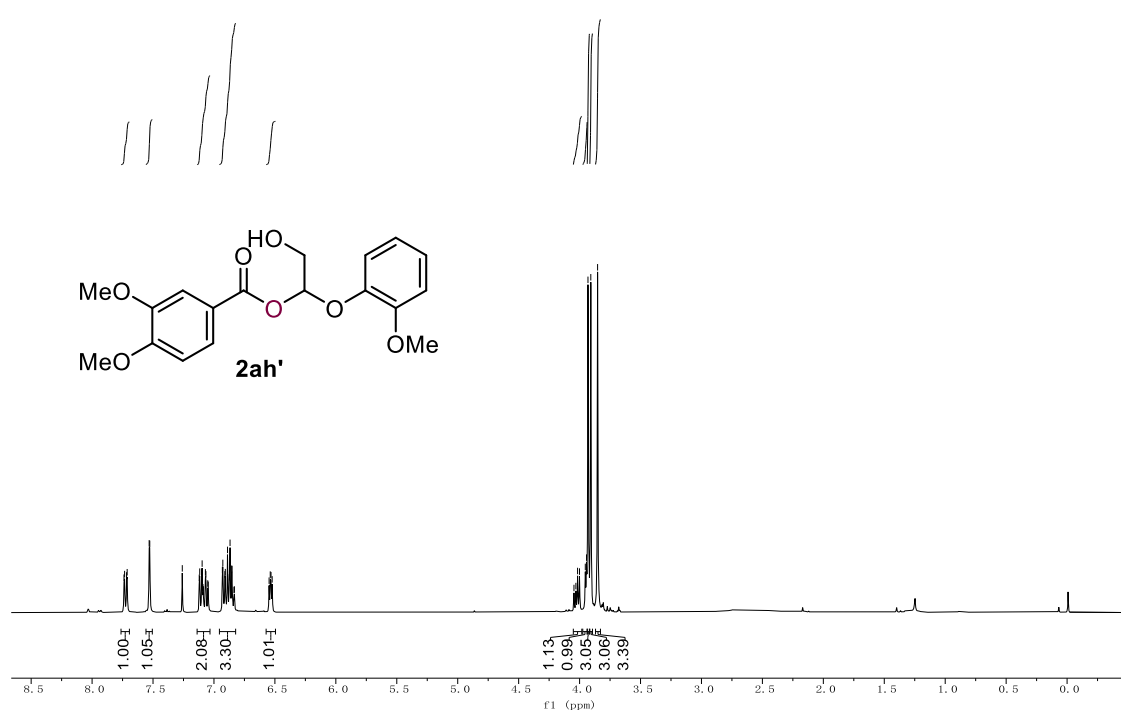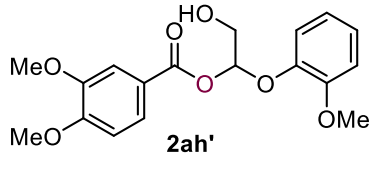

165.15  
 153.62  
 150.96  
 148.80  
 145.32  
 125.09  
 124.33  
 121.71  
 121.28  
 120.64  
 112.33  
 112.22  
 110.37  
 97.70  
 77.48  
 77.16  
 76.84  
 63.35  
 56.18  
 56.15  
 55.94

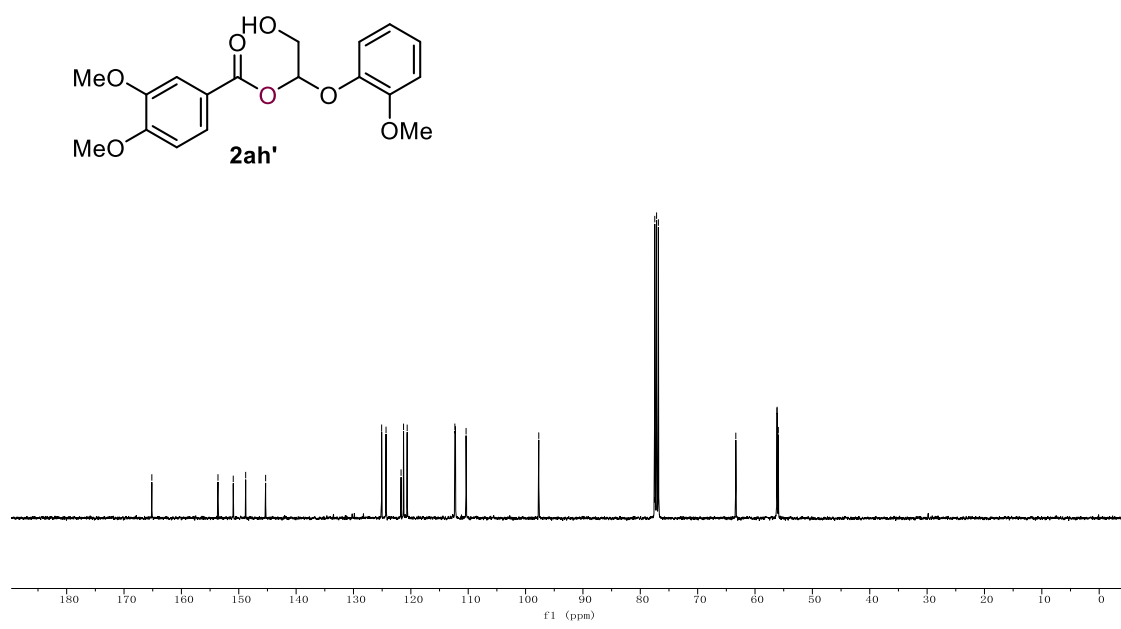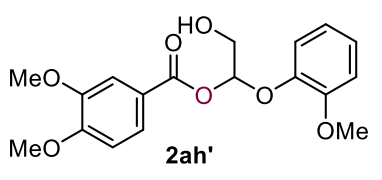

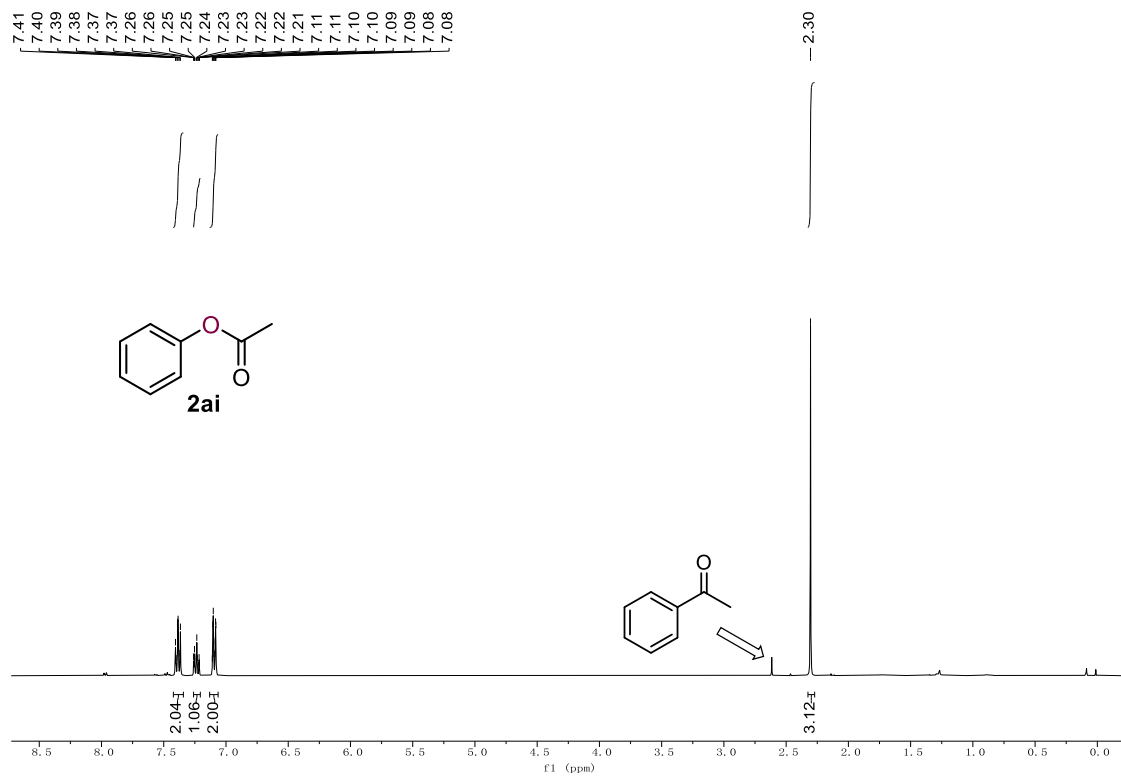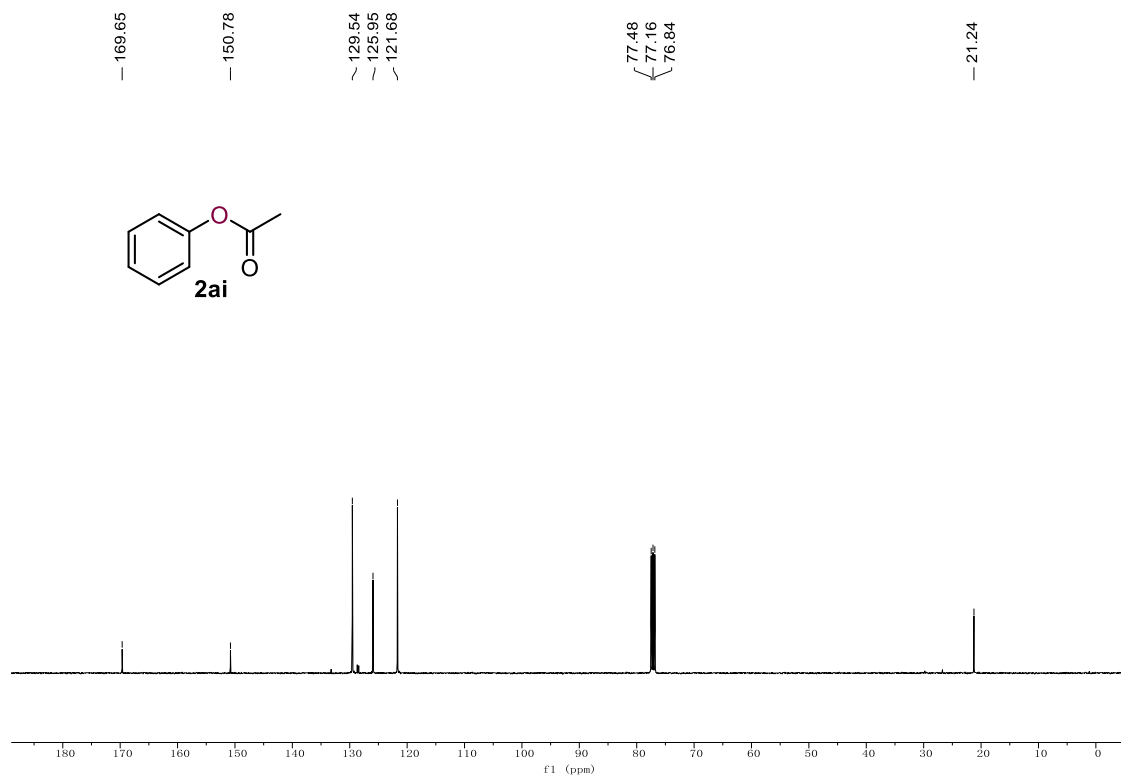

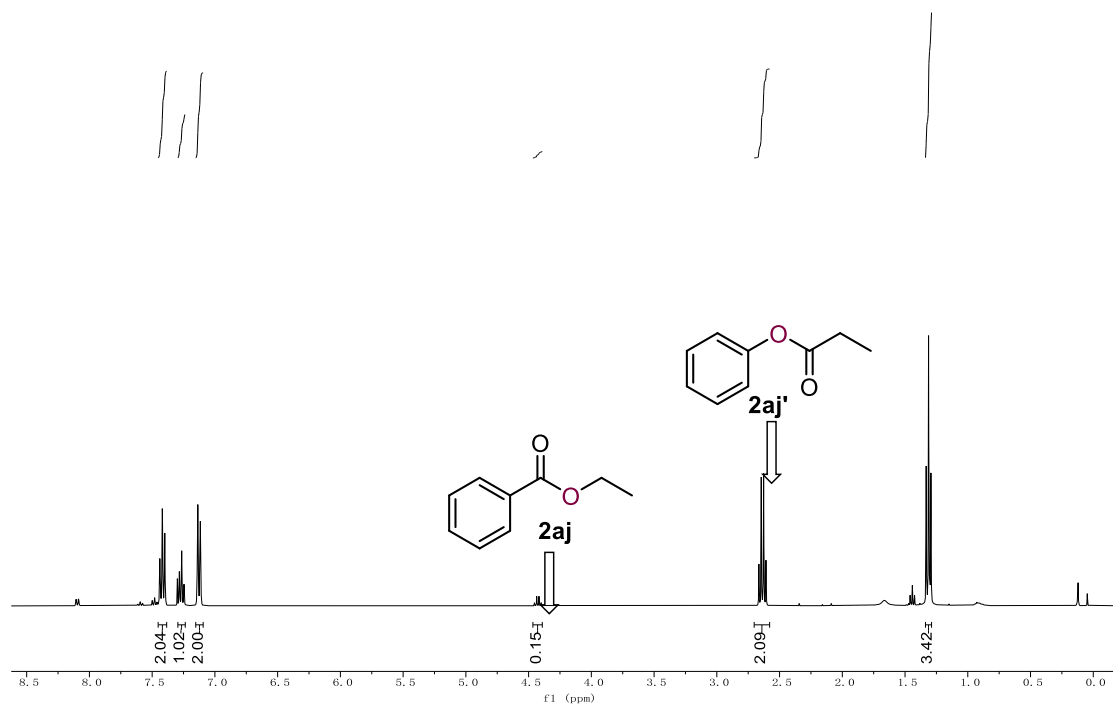

— 173.13      — 150.89      / 129.52  
 \ 125.84  
 \ 121.69      { 77.48  
 { 77.16  
 { 76.84      — 27.87      — 9.20

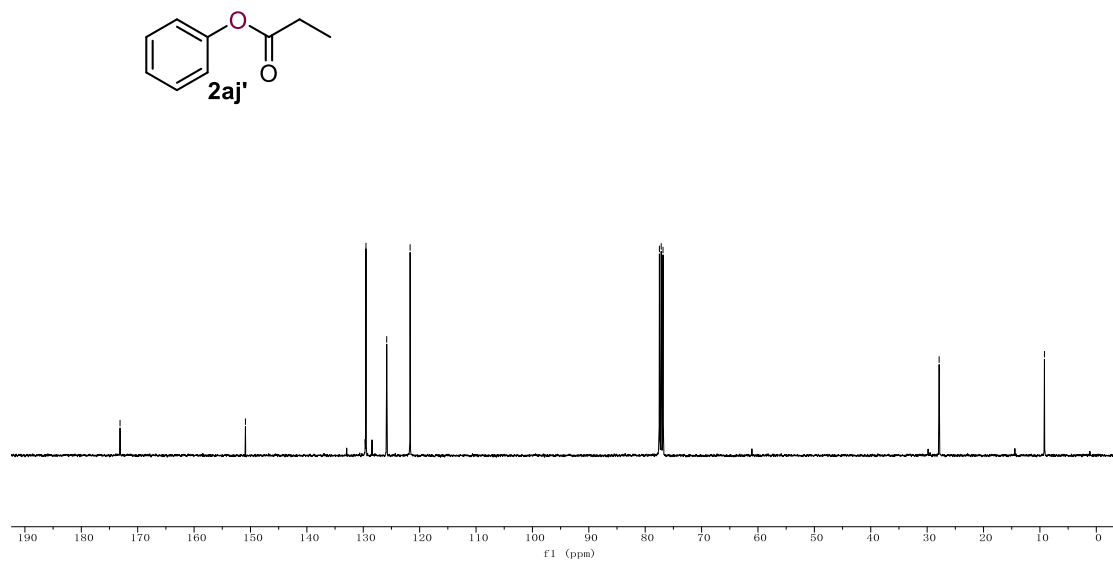



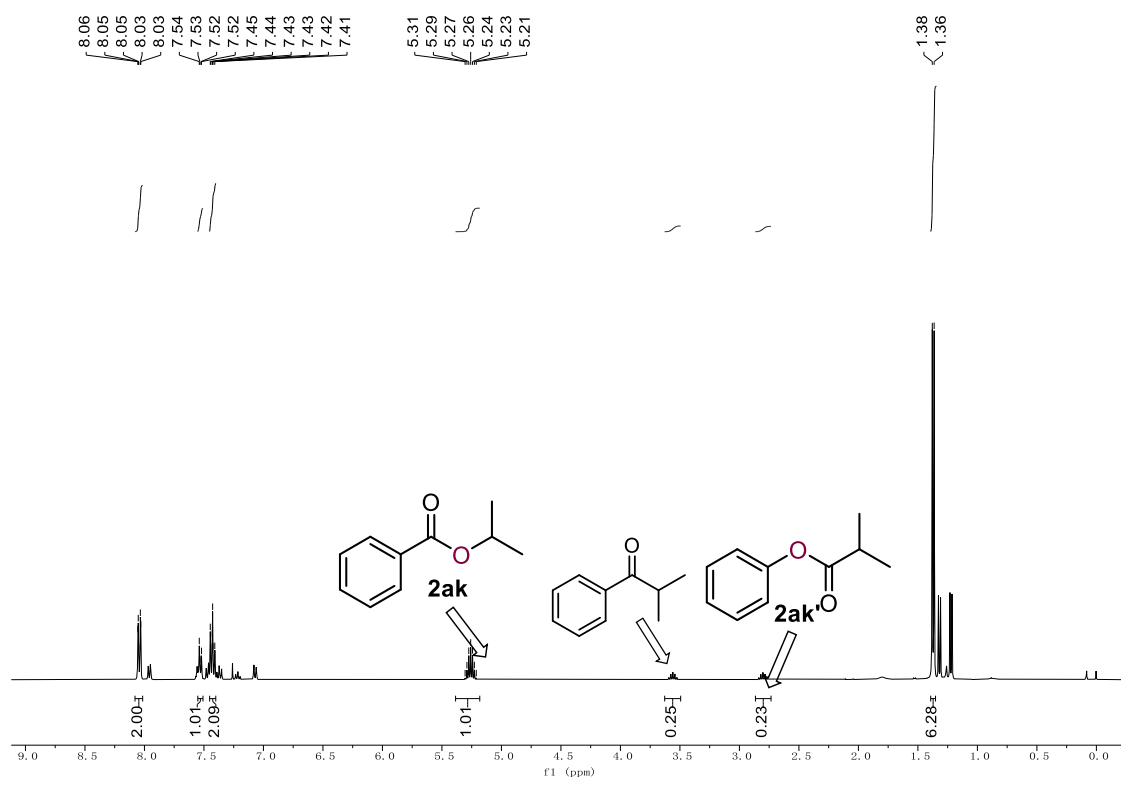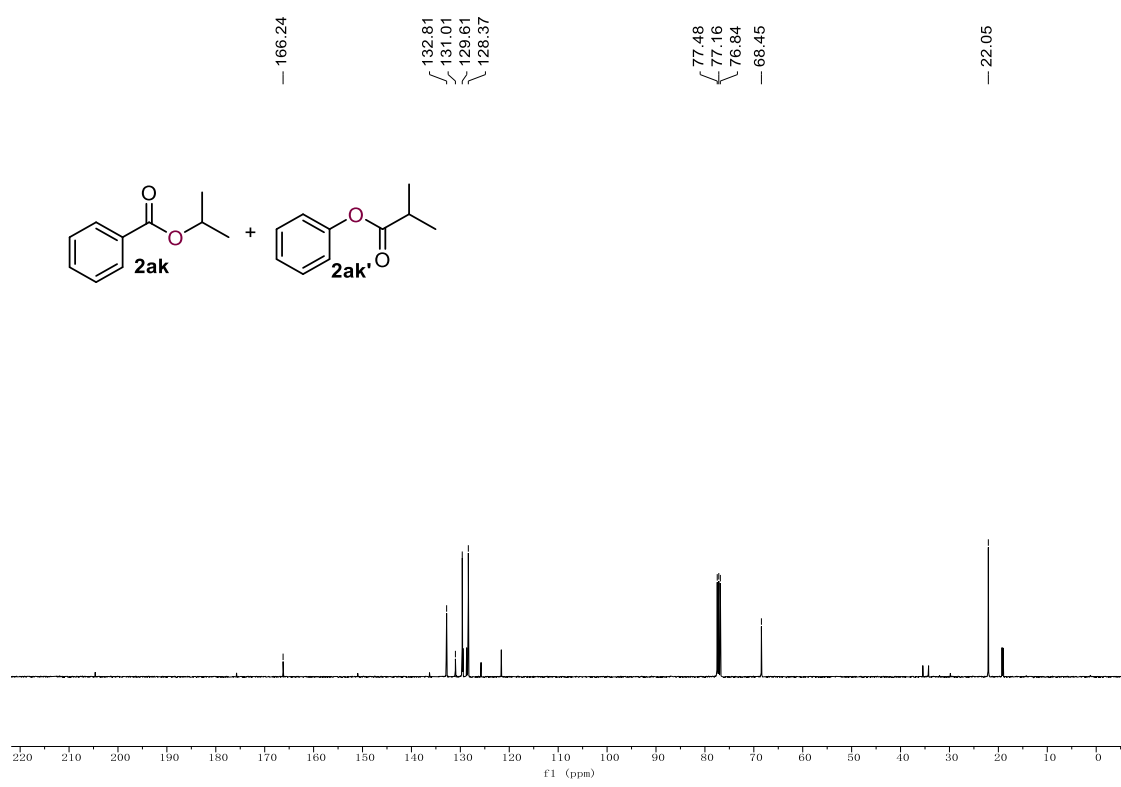

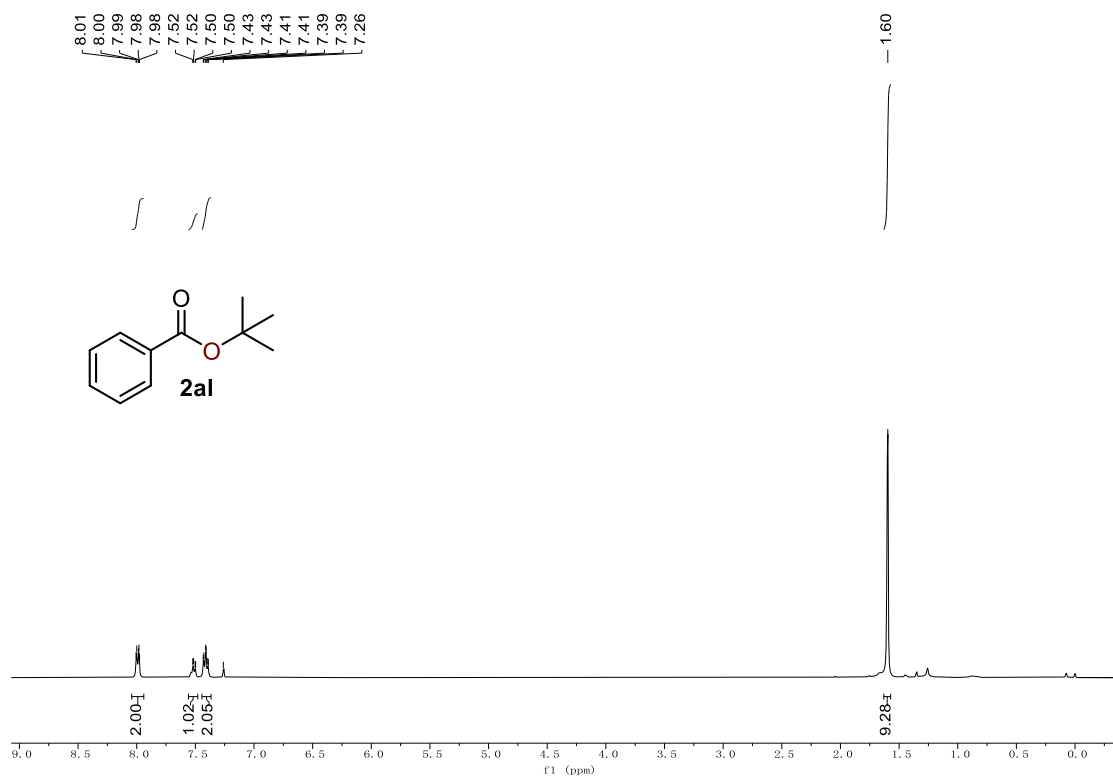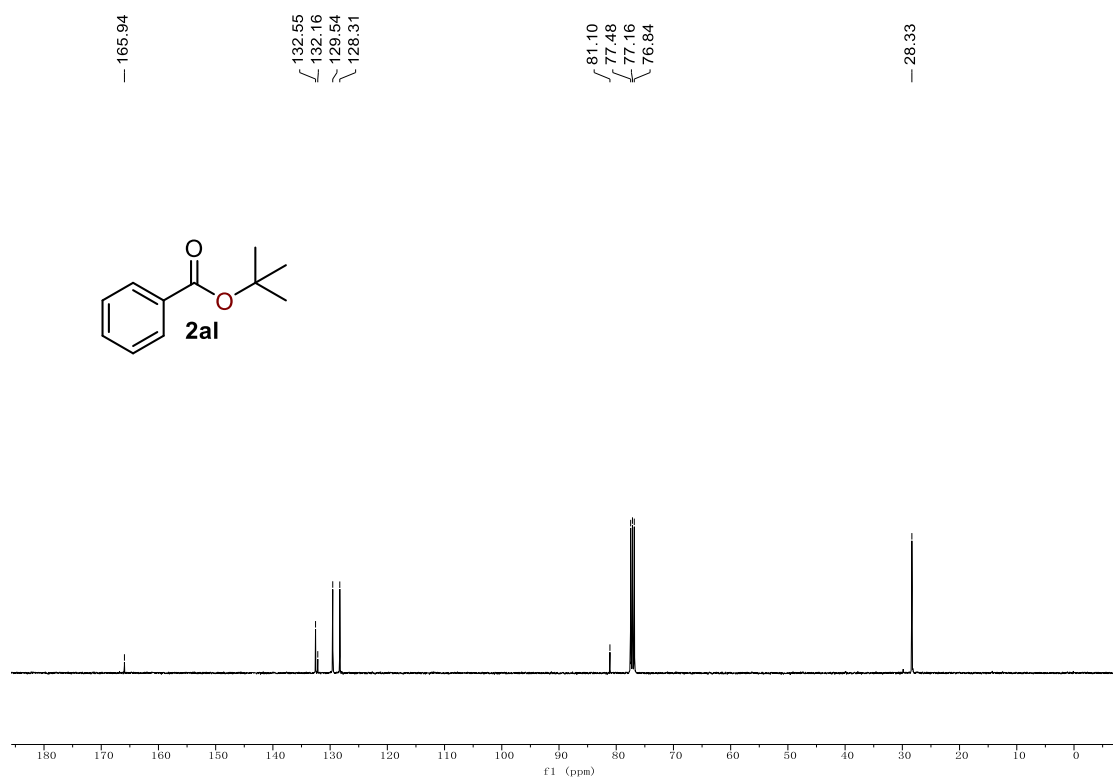

Supplement: d1gc04478h1.pdf [file d1gc04478h1.pdf]
